# Supplementary material for: Alternatives in Education—Evaluation of Rat Simulators in Laboratory Animal Training Courses from Participants’ Perspective
Source: MDPI journal article supplement (doi:10.3390/ani11123462), 2021-12-05
Supplement: s1 [file s1]

**Table S1. Questionnaire for course participants in laboratory animal science courses**

Original PDF document of the two-part paper-based questionnaire on the practical evaluation of currently available rat simulators distributed in LAS (laboratory animal science) courses. Simulator product names were anonymized via codes (Rat simulator A - E) and illustrations were removed. For illustrations of the simulators, see Table 1.

# Welcome to „SimulRATor“!

## We invite you to take part in our survey on simulators in laboratory animal science.

**We are a team of scientists** of the Institutes of Veterinary Anatomy, of Animal Welfare, Animal Behavior and Laboratory Animal Science and of Veterinary Epidemiology and Biometry at the Department of Veterinary Medicine of the Freie Universität Berlin and **are evaluating all currently commercially available rat and mouse simulators in laboratory animal training courses for a research project.**

**Since you as a participant can evaluate best**, how good the training on the simulator and the preparation for the practical exercises on the live animal is, we would kindly ask you for **your personal feedback on the strengths and weaknesses of the simulators** on which you have trained in the course.

**Thank you very much for your participation!**

**The SimulRATor-Team**

Further information can be found at [www.simulrator.de](http://www.simulrator.de) or write to [kontakt@simulrator.de](mailto:kontakt@simulrator.de).

### Part 1 of 2 Rat Simulator A

ID: \_\_\_\_\_

← Please remember your ID for the 2<sup>nd</sup> part.  
**Thank you!**

Privacy Notice: Your participation in the survey is voluntary. The survey data is anonymously stored and managed. Under no circumstances will data be passed on to third parties. We collect no personal information from you. No conclusions on your participation are possible. Only the people involved in the research project have access to the information provided by you within the questionnaire and are obliged to maintain secrecy. The information provided is used for research purposes only. You can cancel the survey at any time without giving reasons.

**1. How well were you able to apply the procedural techniques on the Rat Simulator A?**

| Techniques                                       | Extremely good<br>1 | Quite good<br>2 | Slightly good<br>3 | Slightly bad<br>4 | Quite bad<br>5 | Extremely bad<br>6 | Technique was not trained. |
|--------------------------------------------------|---------------------|-----------------|--------------------|-------------------|----------------|--------------------|----------------------------|
| Handling - transfer from cage to cage            | ○                   | ○               | ○                  | ○                 | ○              | ○                  | ○                          |
| Restraint - scruffing                            | ○                   | ○               | ○                  | ○                 | ○              | ○                  | ○                          |
| Restraint - over the shoulder grip               | ○                   | ○               | ○                  | ○                 | ○              | ○                  | ○                          |
| Restraint - middle shoulder grip                 | ○                   | ○               | ○                  | ○                 | ○              | ○                  | ○                          |
| Restraint - under the shoulder grip              | ○                   | ○               | ○                  | ○                 | ○              | ○                  | ○                          |
| Administration by oral gavage                    | ○                   | ○               | ○                  | ○                 | ○              | ○                  | ○                          |
| Intravenous administration via lateral tail vein | ○                   | ○               | ○                  | ○                 | ○              | ○                  | ○                          |
| Blood sampling from lateral tail vein            | ○                   | ○               | ○                  | ○                 | ○              | ○                  | ○                          |
| Other:<br>_____                                  | ○                   | ○               | ○                  | ○                 | ○              | ○                  | ○                          |
| _____                                            | ○                   | ○               | ○                  | ○                 | ○              | ○                  | ○                          |

**2. How well do the following statements about the training with the Rat Simulator A apply?**

[illegible]

3. If there were material related difficulties using the Rat Simulator A, please give us a brief description of these.

**Technique:** \_\_\_\_\_

**Description of the complication:** \_\_\_\_\_

**Technique:** \_\_\_\_\_

**Description of the complication:** \_\_\_\_\_

**Do you have any recommendations, praise or criticism? We highly appreciate your feedback!**

**Thank you very much for your participation!**

The SimulRATor-Team [kontakt@simulrator.de](mailto:kontakt@simulrator.de)

# Welcome to „SimulRATor“!

## We invite you to take part in our survey on simulators in laboratory animal science.

**We are a team of scientists** of the Institutes of Veterinary Anatomy, of Animal Welfare, Animal Behavior and Laboratory Animal Science and of Veterinary Epidemiology and Biometry at the Department of Veterinary Medicine of the Freie Universität Berlin and **are evaluating all currently commercially available rat and mouse simulators in laboratory animal training courses for a research project.**

**Since you as a participant can evaluate best**, how good the training on the simulator and the preparation for the practical exercises on the live animal is, we would kindly ask you for **your personal feedback on the strengths and weaknesses of the simulators** on which you have trained in the course.

**Thank you very much for your participation!**

### **The SimulRATor-Team**

Further information can be found at [www.simulrator.de](http://www.simulrator.de) or write to [kontakt@simulrator.de](mailto:kontakt@simulrator.de).

### Part 2 of 2 Rat Simulator A

ID: \_\_\_\_\_

Privacy Notice: Your participation in the survey is voluntary. The survey data is anonymously stored and managed. Under no circumstances will data be passed on to third parties. We collect no personal information from you. No conclusions on your participation are possible. Only the people involved in the research project have access to the information provided by you within the questionnaire and are obliged to maintain secrecy. The information provided is used for research purposes only. You can cancel the survey at any time without giving reasons.

| 1. How well were you able to manage handling, restraint, and ear punching on the live rat? |                       |                       |                       |                       |                       |                       |                            |
|--------------------------------------------------------------------------------------------|-----------------------|-----------------------|-----------------------|-----------------------|-----------------------|-----------------------|----------------------------|
| Techniques                                                                                 | Extremely good<br>1   | Quite good<br>2       | Slightly good<br>3    | Slightly bad<br>4     | Quite bad<br>5        | Extremely bad<br>6    | Technique was not trained. |
| Handling - transfer from cage to cage                                                      | <input type="radio"/>      |
| Restraint - scruffing                                                                      | <input type="radio"/>      |
| Restraint - over the shoulder grip                                                         | <input type="radio"/>      |
| Restraint - middle shoulder grip                                                           | <input type="radio"/>      |
| Restraint – under the shoulder grip                                                        | <input type="radio"/>      |
| Ear punching                                                                               | <input type="radio"/>      |
| Other:                                                                                     | <input type="radio"/>      |
|                                                                                            | <input type="radio"/>      |

| 2. How well were you able to manage the following procedural techniques on the live rat? |                       |                       |                       |                       |                       |                       |                       |                          |
|------------------------------------------------------------------------------------------|-----------------------|-----------------------|-----------------------|-----------------------|-----------------------|-----------------------|-----------------------|--------------------------|
| Please also tick the box in the last column if the rat was anesthetized for the method.  |                       |                       |                       |                       |                       |                       |                       |                          |
| Techniques                                                                               | Extremely good<br>1   | Quite good<br>2       | Slightly good<br>3    | Slightly bad<br>4     | Quite bad<br>5        | Extremely bad<br>6    | Not trained.          | Rat in anesthesia.       |
| Feeding the rat                                                                          | <input type="radio"/> | <input type="checkbox"/> |
| Administration by oral gavage                                                            | <input type="radio"/> | <input type="checkbox"/> |
| Subcutaneous administration under skin over the neck                                     | <input type="radio"/> | <input type="checkbox"/> |
| Subcutaneous administration under skin over the flank                                    | <input type="radio"/> | <input type="checkbox"/> |
| Intramuscular administration                                                             | <input type="radio"/> | <input type="checkbox"/> |
| Intraperitoneal administration                                                           | <input type="radio"/> | <input type="checkbox"/> |
| Intravenous administration via dorsal penis vein                                         | <input type="radio"/> | <input type="checkbox"/> |
| Intravenous administration via lateral tail vein                                         | <input type="radio"/> | <input type="checkbox"/> |
| Blood sampling from sublingual vein                                                      | <input type="radio"/> | <input type="checkbox"/> |
| Blood sampling from retro-orbital plexus                                                 | <input type="radio"/> | <input type="checkbox"/> |
| Blood sampling from saphenous vein                                                       | <input type="radio"/> | <input type="checkbox"/> |
| Blood sampling from lateral tail vein                                                    | <input type="radio"/> | <input type="checkbox"/> |
| Blood sampling from heart                                                                | <input type="radio"/> | <input type="checkbox"/> |
| Other:                                                                                   | <input type="radio"/> | <input type="checkbox"/> |
|                                                                                          | <input type="radio"/> | <input type="checkbox"/> |

| 3. Which <u>3 techniques</u> on the live rat are in your opinion particularly demanding for the performer?                                |       |
|-------------------------------------------------------------------------------------------------------------------------------------------|-------|
| Please name 3 techniques from <u>1<sup>st</sup></u> and <u>2<sup>nd</sup></u> question. Please specify the techniques <u>completely</u> . |       |
| 1.                                                                                                                                        | _____ |
| 2.                                                                                                                                        | _____ |
| 3.                                                                                                                                        | _____ |

| 4. Please select from the list below <u>the 5 techniques</u> on the live rat, for which you consider a preparatory training on simulators to be particularly useful. |                                                       |
|----------------------------------------------------------------------------------------------------------------------------------------------------------------------|-------------------------------------------------------|
| <u>Max. 5 techniques</u> can be chosen.                                                                                                                              |                                                       |
| <input type="checkbox"/>                                                                                                                                             | Handling - transfer from cage to cage                 |
| <input type="checkbox"/>                                                                                                                                             | Restraint (different techniques)                      |
| <input type="checkbox"/>                                                                                                                                             | Ear punching                                          |
| <input type="checkbox"/>                                                                                                                                             | Feeding the rat                                       |
| <input type="checkbox"/>                                                                                                                                             | Administration by oral gavage                         |
| <input type="checkbox"/>                                                                                                                                             | Subcutaneous administration under skin over the neck  |
| <input type="checkbox"/>                                                                                                                                             | Subcutaneous administration under skin over the flank |
| <input type="checkbox"/>                                                                                                                                             | Intramuscular administration                          |
| <input type="checkbox"/>                                                                                                                                             | Intraperitoneal administration                        |
| <input type="checkbox"/>                                                                                                                                             | Intravenous administration via dorsal penis vein      |
| <input type="checkbox"/>                                                                                                                                             | Intravenous administration via lateral tail vein      |
| <input type="checkbox"/>                                                                                                                                             | Blood sampling from sublingual vein                   |
| <input type="checkbox"/>                                                                                                                                             | Blood sampling from retro-orbital plexus              |
| <input type="checkbox"/>                                                                                                                                             | Blood sampling from saphenous vein                    |
| <input type="checkbox"/>                                                                                                                                             | Blood sampling from lateral tail vein                 |
| <input type="checkbox"/>                                                                                                                                             | Blood sampling from heart                             |

| 5. Would you also like to have a simulator training for <u>other</u> methods on the rat? |  |
|------------------------------------------------------------------------------------------|--|
| If so, please describe which technique(s) is/are important to you.                       |  |
|                                                                                          |  |

## Your personal feedback about the Rat Simulator A

### 6. How realistic are the following features of the Rat Simulator A in comparison to a live rat?

| Features                                                                                  | Extremely realistic<br>1 | Quite realistic<br>2  | Slightly realistic<br>3 | Slightly unrealistic<br>4 | Quite unrealistic<br>5 | Extremely unrealistic<br>6 |
|-------------------------------------------------------------------------------------------|--------------------------|-----------------------|-------------------------|---------------------------|------------------------|----------------------------|
| General appearance                                                                        | <input type="radio"/>    | <input type="radio"/> | <input type="radio"/>   | <input type="radio"/>     | <input type="radio"/>  | <input type="radio"/>      |
| Haptics  | <input type="radio"/>    | <input type="radio"/> | <input type="radio"/>   | <input type="radio"/>     | <input type="radio"/>  | <input type="radio"/>      |
| Movability of skin over neck                                                              | <input type="radio"/>    | <input type="radio"/> | <input type="radio"/>   | <input type="radio"/>     | <input type="radio"/>  | <input type="radio"/>      |
| Movability of skin over flank                                                             | <input type="radio"/>    | <input type="radio"/> | <input type="radio"/>   | <input type="radio"/>     | <input type="radio"/>  | <input type="radio"/>      |
| Consistency of skin surface                                                               | <input type="radio"/>    | <input type="radio"/> | <input type="radio"/>   | <input type="radio"/>     | <input type="radio"/>  | <input type="radio"/>      |
| Body height                                                                               | <input type="radio"/>    | <input type="radio"/> | <input type="radio"/>   | <input type="radio"/>     | <input type="radio"/>  | <input type="radio"/>      |
| Body weight                                                                               | <input type="radio"/>    | <input type="radio"/> | <input type="radio"/>   | <input type="radio"/>     | <input type="radio"/>  | <input type="radio"/>      |
| Body shape                                                                                | <input type="radio"/>    | <input type="radio"/> | <input type="radio"/>   | <input type="radio"/>     | <input type="radio"/>  | <input type="radio"/>      |
| Proportions                                                                               | <input type="radio"/>    | <input type="radio"/> | <input type="radio"/>   | <input type="radio"/>     | <input type="radio"/>  | <input type="radio"/>      |

### 7. How realistic was the training with the Rat Simulator A in comparison to a live rat for you?

| Techniques                                       | Extremely realistic<br>1 | Quite realistic<br>2  | Slightly realistic<br>3 | Slightly unrealistic<br>4 | Quite unrealistic<br>5 | Extremely unrealistic<br>6 | Technique was not trained. |
|--------------------------------------------------|--------------------------|-----------------------|-------------------------|---------------------------|------------------------|----------------------------|----------------------------|
| Handling - transfer from cage to cage            | <input type="radio"/>    | <input type="radio"/> | <input type="radio"/>   | <input type="radio"/>     | <input type="radio"/>  | <input type="radio"/>      | <input type="radio"/>      |
| Restraint - scruffing                            | <input type="radio"/>    | <input type="radio"/> | <input type="radio"/>   | <input type="radio"/>     | <input type="radio"/>  | <input type="radio"/>      | <input type="radio"/>      |
| Restraint - over the shoulder grip               | <input type="radio"/>    | <input type="radio"/> | <input type="radio"/>   | <input type="radio"/>     | <input type="radio"/>  | <input type="radio"/>      | <input type="radio"/>      |
| Restraint - middle shoulder grip                 | <input type="radio"/>    | <input type="radio"/> | <input type="radio"/>   | <input type="radio"/>     | <input type="radio"/>  | <input type="radio"/>      | <input type="radio"/>      |
| Restraint - under the shoulder grip              | <input type="radio"/>    | <input type="radio"/> | <input type="radio"/>   | <input type="radio"/>     | <input type="radio"/>  | <input type="radio"/>      | <input type="radio"/>      |
| Administration by oral gavage                    | <input type="radio"/>    | <input type="radio"/> | <input type="radio"/>   | <input type="radio"/>     | <input type="radio"/>  | <input type="radio"/>      | <input type="radio"/>      |
| Intravenous administration via lateral tail vein | <input type="radio"/>    | <input type="radio"/> | <input type="radio"/>   | <input type="radio"/>     | <input type="radio"/>  | <input type="radio"/>      | <input type="radio"/>      |
| Blood sampling from lateral tail vein            | <input type="radio"/>    | <input type="radio"/> | <input type="radio"/>   | <input type="radio"/>     | <input type="radio"/>  | <input type="radio"/>      | <input type="radio"/>      |
| Other:<br>_____                                  | <input type="radio"/>    | <input type="radio"/> | <input type="radio"/>   | <input type="radio"/>     | <input type="radio"/>  | <input type="radio"/>      | <input type="radio"/>      |
| _____                                            | <input type="radio"/>    | <input type="radio"/> | <input type="radio"/>   | <input type="radio"/>     | <input type="radio"/>  | <input type="radio"/>      | <input type="radio"/>      |

### 8. How well do the following statements about the training with the Rat Simulator A apply?

|                                                                                 | Completely applies<br>1 | Largely applies<br>2  | Slightly applies<br>3 | Slightly does not apply<br>4 | Largely does not apply<br>5 | Does not apply at all<br>6 |
|---------------------------------------------------------------------------------|-------------------------|-----------------------|-----------------------|------------------------------|-----------------------------|----------------------------|
| I felt more secure in performing <b>handling and restraint</b> on the live rat. | <input type="radio"/>   | <input type="radio"/> | <input type="radio"/> | <input type="radio"/>        | <input type="radio"/>       | <input type="radio"/>      |
| I felt more secure in performing <b>procedural techniques</b> on the live rat.  | <input type="radio"/>   | <input type="radio"/> | <input type="radio"/> | <input type="radio"/>        | <input type="radio"/>       | <input type="radio"/>      |

| 9. How well did the Rat Simulator A prepare you for the entire course training on the live rat? |                       |                       |                       |                       |                       |
|-------------------------------------------------------------------------------------------------|-----------------------|-----------------------|-----------------------|-----------------------|-----------------------|
| Extremely good                                                                                  | Quite good            | Slightly good         | Slightly bad          | Quite bad             | Extremely bad         |
| 1                                                                                               | 2                     | 3                     | 4                     | 5                     | 6                     |
| <input type="radio"/>                                                                           | <input type="radio"/> | <input type="radio"/> | <input type="radio"/> | <input type="radio"/> | <input type="radio"/> |

| 10. How well did the Rat Simulator A prepare you for the following techniques in the course training on the live rat? |                       |                       |                       |                       |                       |                       |                            |
|-----------------------------------------------------------------------------------------------------------------------|-----------------------|-----------------------|-----------------------|-----------------------|-----------------------|-----------------------|----------------------------|
| Techniques                                                                                                            | Extremely good<br>1   | Quite good<br>2       | Slightly good<br>3    | Slightly bad<br>4     | Quite bad<br>5        | Extremely bad<br>6    | Technique was not trained. |
| Handling - transfer from cage to cage                                                                                 | <input type="radio"/>      |
| Restraint - scruffing                                                                                                 | <input type="radio"/>      |
| Restraint - over the shoulder grip                                                                                    | <input type="radio"/>      |
| Restraint - middle shoulder grip                                                                                      | <input type="radio"/>      |
| Restraint - under the shoulder grip                                                                                   | <input type="radio"/>      |
| Administration by oral gavage                                                                                         | <input type="radio"/>      |
| Intravenous administration via lateral tail vein                                                                      | <input type="radio"/>      |
| Blood sampling from lateral tail vein                                                                                 | <input type="radio"/>      |
| Other:                                                                                                                | <input type="radio"/>      |
|                                                                                                                       | <input type="radio"/>      |

| 11. What did you particularly like about the Rat Simulator A? |
|---------------------------------------------------------------|
| <br><br><br><br><br><br><br><br><br><br>                      |

| 12. What did you <u>not</u> like about the Rat Simulator A? |
|-------------------------------------------------------------|
| <br><br><br><br><br><br><br><br><br><br>                    |

| 13. What would you like to improve about the Rat Simulator A? |
|---------------------------------------------------------------|
| <br><br><br><br><br><br><br><br><br><br>                      |

14. Which species are you expecting to work with for scientific reasons in the next 6 months after you have passed the course?

Multiple answers for species are possible.

- |                                     |                                |                                          |
|-------------------------------------|--------------------------------|------------------------------------------|
| <input type="checkbox"/> Rat        | <input type="checkbox"/> Pig   | <input type="checkbox"/> Dog             |
| <input type="checkbox"/> Mouse      | <input type="checkbox"/> Sheep | <input type="checkbox"/> Cat             |
| <input type="checkbox"/> Rabbit     | <input type="checkbox"/> Goat  | <input type="checkbox"/> Other _____     |
| <input type="checkbox"/> Guinea pig | <input type="checkbox"/> Cow   | <input type="checkbox"/> None            |
| <input type="checkbox"/> Hamster    | <input type="checkbox"/> Horse | <input type="checkbox"/> I cannot judge. |

15. How old are you?

\_\_\_\_\_ years

**16. What is your gender?**

- ☐ Male
- ☐ Female
- ☐ Other
- ☐ No answer

**17. Please mark your highest educational degree you have achieved.**

Only one answer is possible.

- ☐ (Still) no qualification (yet)
- ☐ Apprenticeship/Vocational training
- ☐ Technical college qualification
- ☐ University of Applied Sciences Degree
- ☐ Bachelor's Degree
- ☐ Master's Degree, diploma or state examination
- ☐ Ph.D. /Doctoral degree
- ☐ Other: \_\_\_\_\_

**18. Please complete the sentence below.**

Only one answer is possible.

**I am participating in the course as ...**

- ☐ ...an academic employee.
- ☐ ...a technical assistant.
- ☐ ...an apprentice.
- ☐ ...a student.
- ☐ ...other: \_\_\_\_\_.

**19. What is your discipline?**

Only one answer is possible.

- ☐ Human Medicine
- ☐ Veterinary Medicine
- ☐ Dental Medicine
- ☐ Pharmacology
- ☐ Biology
- ☐ Chemistry
- ☐ Physics
- ☐ Biotechnology
- ☐ Nutritional Science
- ☐ Other: \_\_\_\_\_

**20. Had you already had experience ...**

Only one answer is possible.

**...in handling rats before the course?**

- ☐ Yes, a lot of.
- ☐ Yes, a little bit.
- ☐ No, not at all.

**21. Had you already had experience ...**

Only one answer is possible.

**...in handling mice before the course?**

- ☐ Yes, a lot of.
- ☐ Yes, a little bit.
- ☐ No, not at all.

**22. Had you already worked with other simulator(s) before the course?**

Multiple answers for simulators are possible. Please describe the model in brief.

- ☐ Yes, ...
  - ☐ ...with rat simulators: Model: \_\_\_\_\_
  - ☐ ...with mouse simulators: Model: \_\_\_\_\_
  - ☐ ...with other simulators: Model: \_\_\_\_\_
- ☐ No.

**Do you have any recommendations, praise or criticism? We highly appreciate your feedback!**

**Thank you very much for your participation!**

**The SimulRATor-Team**

**[web: www.simulator.de](http://www.simulator.de) mail: [kontakt@simulator.de](mailto:kontakt@simulator.de)**



# Welcome to „SimulRATor“!

## We invite you to take part in our survey on simulators in laboratory animal science.

**We are a team of scientists** of the Institutes of Veterinary Anatomy, of Animal Welfare, Animal Behavior and Laboratory Animal Science and of Veterinary Epidemiology and Biometry at the Department of Veterinary Medicine of the Freie Universität Berlin and **are evaluating all currently commercially available rat and mouse simulators in laboratory animal training courses for a research project.**

**Since you as a participant can evaluate best**, how good the training on the simulator and the preparation for the practical exercises on the live animal is, we would kindly ask you for **your personal feedback on the strengths and weaknesses of the simulators** on which you have trained in the course.

**Thank you very much for your participation!**

### **The SimulRATor-Team**

Further information can be found at [www.simulrator.de](http://www.simulrator.de) or write to [kontakt@simulrator.de](mailto:kontakt@simulrator.de).

### **Part 1 of 2 Rat Simulator B**

ID: \_\_\_\_\_

← Please remember your ID for the 2<sup>nd</sup> part.  
**Thank you!**

Privacy Notice: Your participation in the survey is voluntary. The survey data is anonymously stored and managed. Under no circumstances will data be passed on to third parties. We collect no personal information from you. No conclusions on your participation are possible. Only the people involved in the research project have access to the information provided by you within the questionnaire and are obliged to maintain secrecy. The information provided is used for research purposes only. You can cancel the survey at any time without giving reasons.

**1. How well were you able to apply the procedural techniques on the Rat Simulator B?**

| Techniques                                       | Extremely good<br>1 | Quite good<br>2 | Slightly good<br>3 | Slightly bad<br>4 | Quite bad<br>5 | Extremely bad<br>6 | Technique was not trained. |
|--------------------------------------------------|---------------------|-----------------|--------------------|-------------------|----------------|--------------------|----------------------------|
| Handling - transfer from cage to cage            | ○                   | ○               | ○                  | ○                 | ○              | ○                  | ○                          |
| Restraint - scruffing                            | ○                   | ○               | ○                  | ○                 | ○              | ○                  | ○                          |
| Restraint - over the shoulder grip               | ○                   | ○               | ○                  | ○                 | ○              | ○                  | ○                          |
| Restraint - middle shoulder grip                 | ○                   | ○               | ○                  | ○                 | ○              | ○                  | ○                          |
| Restraint - under the shoulder grip              | ○                   | ○               | ○                  | ○                 | ○              | ○                  | ○                          |
| Administration by oral gavage                    | ○                   | ○               | ○                  | ○                 | ○              | ○                  | ○                          |
| Intravenous administration via lateral tail vein | ○                   | ○               | ○                  | ○                 | ○              | ○                  | ○                          |
| Blood sampling from lateral tail vein            | ○                   | ○               | ○                  | ○                 | ○              | ○                  | ○                          |
| Other:<br>_____                                  | ○                   | ○               | ○                  | ○                 | ○              | ○                  | ○                          |
| _____                                            | ○                   | ○               | ○                  | ○                 | ○              | ○                  | ○                          |

**2. How well do the following statements about the training with the Rat Simulator B apply?**

[illegible]

3. If there were material related difficulties using the Rat Simulator B, please give us a brief description of these.

| Technique                        |  |
|----------------------------------|--|
| Technique:                       |  |
| Description of the complication: |  |
|                                  |  |
|                                  |  |
| Technique:                       |  |
| Description of the complication: |  |
|                                  |  |
|                                  |  |

**Do you have any recommendations, praise or criticism? We highly appreciate your feedback!**

[illegible]

**Thank you very much for your participation!**

The SimulRATor-Team [kontakt@simulator.de](mailto:kontakt@simulator.de)

# Welcome to „SimulRATor“!

## We invite you to take part in our survey on simulators in laboratory animal science.

**We are a team of scientists** of the Institutes of Veterinary Anatomy, of Animal Welfare, Animal Behavior and Laboratory Animal Science and of Veterinary Epidemiology and Biometry at the Department of Veterinary Medicine of the Freie Universität Berlin and **are evaluating all currently commercially available rat and mouse simulators in laboratory animal training courses for a research project.**

**Since you as a participant can evaluate best**, how good the training on the simulator and the preparation for the practical exercises on the live animal is, we would kindly ask you for **your personal feedback on the strengths and weaknesses of the simulators** on which you have trained in the course.

**Thank you very much for your participation!**

### **The SimulRATor-Team**

Further information can be found at [www.simulrator.de](http://www.simulrator.de) or write to [kontakt@simulrator.de](mailto:kontakt@simulrator.de).

### **Part 2 of 2 Rat Simulator B**

ID: \_\_\_\_\_

Privacy Notice: Your participation in the survey is voluntary. The survey data is anonymously stored and managed. Under no circumstances will data be passed on to third parties. We collect no personal information from you. No conclusions on your participation are possible. Only the people involved in the research project have access to the information provided by you within the questionnaire and are obliged to maintain secrecy. The information provided is used for research purposes only. You can cancel the survey at any time without giving reasons.

| 1. How well were you able to manage handling, restraint, and ear punching on the live rat? |                       |                       |                       |                       |                       |                       |                            |
|--------------------------------------------------------------------------------------------|-----------------------|-----------------------|-----------------------|-----------------------|-----------------------|-----------------------|----------------------------|
| Techniques                                                                                 | Extremely good<br>1   | Quite good<br>2       | Slightly good<br>3    | Slightly bad<br>4     | Quite bad<br>5        | Extremely bad<br>6    | Technique was not trained. |
| Handling - transfer from cage to cage                                                      | <input type="radio"/>      |
| Restraint - scruffing                                                                      | <input type="radio"/>      |
| Restraint - over the shoulder grip                                                         | <input type="radio"/>      |
| Restraint - middle shoulder grip                                                           | <input type="radio"/>      |
| Restraint – under the shoulder grip                                                        | <input type="radio"/>      |
| Ear punching                                                                               | <input type="radio"/>      |
| Other:                                                                                     | <input type="radio"/>      |
|                                                                                            | <input type="radio"/>      |

| 2. How well were you able to manage the following procedural techniques on the live rat? |                       |                       |                       |                       |                       |                       |                       |                          |
|------------------------------------------------------------------------------------------|-----------------------|-----------------------|-----------------------|-----------------------|-----------------------|-----------------------|-----------------------|--------------------------|
| Please also tick the box in the last column if the rat was anesthetized for the method.  |                       |                       |                       |                       |                       |                       |                       |                          |
| Techniques                                                                               | Extremely good<br>1   | Quite good<br>2       | Slightly good<br>3    | Slightly bad<br>4     | Quite bad<br>5        | Extremely bad<br>6    | Not trained.          | Rat in anesthesia.       |
| Feeding the rat                                                                          | <input type="radio"/> | <input type="checkbox"/> |
| Administration by oral gavage                                                            | <input type="radio"/> | <input type="checkbox"/> |
| Subcutaneous administration under skin over the neck                                     | <input type="radio"/> | <input type="checkbox"/> |
| Subcutaneous administration under skin over the flank                                    | <input type="radio"/> | <input type="checkbox"/> |
| Intramuscular administration                                                             | <input type="radio"/> | <input type="checkbox"/> |
| Intraperitoneal administration                                                           | <input type="radio"/> | <input type="checkbox"/> |
| Intravenous administration via dorsal penis vein                                         | <input type="radio"/> | <input type="checkbox"/> |
| Intravenous administration via lateral tail vein                                         | <input type="radio"/> | <input type="checkbox"/> |
| Blood sampling from sublingual vein                                                      | <input type="radio"/> | <input type="checkbox"/> |
| Blood sampling from retro-orbital plexus                                                 | <input type="radio"/> | <input type="checkbox"/> |
| Blood sampling from saphenous vein                                                       | <input type="radio"/> | <input type="checkbox"/> |
| Blood sampling from lateral tail vein                                                    | <input type="radio"/> | <input type="checkbox"/> |
| Blood sampling from heart                                                                | <input type="radio"/> | <input type="checkbox"/> |
| Other:                                                                                   | <input type="radio"/> | <input type="checkbox"/> |
|                                                                                          | <input type="radio"/> | <input type="checkbox"/> |

| 3. Which 3 techniques on the live rat are in your opinion particularly demanding for the performer?                           |       |
|-------------------------------------------------------------------------------------------------------------------------------|-------|
| Please name 3 techniques from 1 <sup>st</sup> and 2 <sup>nd</sup> question. Please specify the techniques <u>completely</u> . |       |
| 1.                                                                                                                            | _____ |
| 2.                                                                                                                            | _____ |
| 3.                                                                                                                            | _____ |

| 4. Please select from the list below the 5 techniques on the live rat, for which you consider a preparatory training on simulators to be particularly useful. |                                                       |
|---------------------------------------------------------------------------------------------------------------------------------------------------------------|-------------------------------------------------------|
| <b>Max. 5 techniques can be chosen.</b>                                                                                                                       |                                                       |
| <input type="checkbox"/>                                                                                                                                      | Handling - transfer from cage to cage                 |
| <input type="checkbox"/>                                                                                                                                      | Restraint (different techniques)                      |
| <input type="checkbox"/>                                                                                                                                      | Ear punching                                          |
| <input type="checkbox"/>                                                                                                                                      | Feeding the rat                                       |
| <input type="checkbox"/>                                                                                                                                      | Administration by oral gavage                         |
| <input type="checkbox"/>                                                                                                                                      | Subcutaneous administration under skin over the neck  |
| <input type="checkbox"/>                                                                                                                                      | Subcutaneous administration under skin over the flank |
| <input type="checkbox"/>                                                                                                                                      | Intramuscular administration                          |
| <input type="checkbox"/>                                                                                                                                      | Intraperitoneal administration                        |
| <input type="checkbox"/>                                                                                                                                      | Intravenous administration via dorsal penis vein      |
| <input type="checkbox"/>                                                                                                                                      | Intravenous administration via lateral tail vein      |
| <input type="checkbox"/>                                                                                                                                      | Blood sampling from sublingual vein                   |
| <input type="checkbox"/>                                                                                                                                      | Blood sampling from retro-orbital plexus              |
| <input type="checkbox"/>                                                                                                                                      | Blood sampling from saphenous vein                    |
| <input type="checkbox"/>                                                                                                                                      | Blood sampling from lateral tail vein                 |
| <input type="checkbox"/>                                                                                                                                      | Blood sampling from heart                             |

| 5. Would you also like to have a simulator training for <u>other</u> methods on the rat? |  |
|------------------------------------------------------------------------------------------|--|
| If so, please describe which technique(s) is/are important to you.                       |  |
|                                                                                          |  |

## Your personal feedback about the Rat Simulator B

### 6. How realistic are the following features of the Rat Simulator B in comparison to a live rat?

| Features                                                                                 | Extremely realistic<br>1 | Quite realistic<br>2  | Slightly realistic<br>3 | Slightly unrealistic<br>4 | Quite unrealistic<br>5 | Extremely unrealistic<br>6 |
|------------------------------------------------------------------------------------------|--------------------------|-----------------------|-------------------------|---------------------------|------------------------|----------------------------|
| General appearance                                                                       | <input type="radio"/>    | <input type="radio"/> | <input type="radio"/>   | <input type="radio"/>     | <input type="radio"/>  | <input type="radio"/>      |
| Haptic  | <input type="radio"/>    | <input type="radio"/> | <input type="radio"/>   | <input type="radio"/>     | <input type="radio"/>  | <input type="radio"/>      |
| Movability of skin over neck                                                             | <input type="radio"/>    | <input type="radio"/> | <input type="radio"/>   | <input type="radio"/>     | <input type="radio"/>  | <input type="radio"/>      |
| Movability of skin over flank                                                            | <input type="radio"/>    | <input type="radio"/> | <input type="radio"/>   | <input type="radio"/>     | <input type="radio"/>  | <input type="radio"/>      |
| Consistency of skin surface                                                              | <input type="radio"/>    | <input type="radio"/> | <input type="radio"/>   | <input type="radio"/>     | <input type="radio"/>  | <input type="radio"/>      |
| Body height                                                                              | <input type="radio"/>    | <input type="radio"/> | <input type="radio"/>   | <input type="radio"/>     | <input type="radio"/>  | <input type="radio"/>      |
| Body weight                                                                              | <input type="radio"/>    | <input type="radio"/> | <input type="radio"/>   | <input type="radio"/>     | <input type="radio"/>  | <input type="radio"/>      |
| Body shape                                                                               | <input type="radio"/>    | <input type="radio"/> | <input type="radio"/>   | <input type="radio"/>     | <input type="radio"/>  | <input type="radio"/>      |
| Proportions                                                                              | <input type="radio"/>    | <input type="radio"/> | <input type="radio"/>   | <input type="radio"/>     | <input type="radio"/>  | <input type="radio"/>      |

### 7. How realistic was the training with the Rat Simulator B in comparison to a live rat for you?

| Techniques                                       | Extremely realistic<br>1 | Quite realistic<br>2  | Slightly realistic<br>3 | Slightly unrealistic<br>4 | Quite unrealistic<br>5 | Extremely unrealistic<br>6 | Technique was not trained. |
|--------------------------------------------------|--------------------------|-----------------------|-------------------------|---------------------------|------------------------|----------------------------|----------------------------|
| Handling - transfer from cage to cage            | <input type="radio"/>    | <input type="radio"/> | <input type="radio"/>   | <input type="radio"/>     | <input type="radio"/>  | <input type="radio"/>      | <input type="radio"/>      |
| Restraint - scruffing                            | <input type="radio"/>    | <input type="radio"/> | <input type="radio"/>   | <input type="radio"/>     | <input type="radio"/>  | <input type="radio"/>      | <input type="radio"/>      |
| Restraint - over the shoulder grip               | <input type="radio"/>    | <input type="radio"/> | <input type="radio"/>   | <input type="radio"/>     | <input type="radio"/>  | <input type="radio"/>      | <input type="radio"/>      |
| Restraint - middle shoulder grip                 | <input type="radio"/>    | <input type="radio"/> | <input type="radio"/>   | <input type="radio"/>     | <input type="radio"/>  | <input type="radio"/>      | <input type="radio"/>      |
| Restraint - under the shoulder grip              | <input type="radio"/>    | <input type="radio"/> | <input type="radio"/>   | <input type="radio"/>     | <input type="radio"/>  | <input type="radio"/>      | <input type="radio"/>      |
| Administration by oral gavage                    | <input type="radio"/>    | <input type="radio"/> | <input type="radio"/>   | <input type="radio"/>     | <input type="radio"/>  | <input type="radio"/>      | <input type="radio"/>      |
| Intravenous administration via lateral tail vein | <input type="radio"/>    | <input type="radio"/> | <input type="radio"/>   | <input type="radio"/>     | <input type="radio"/>  | <input type="radio"/>      | <input type="radio"/>      |
| Blood sampling from lateral tail vein            | <input type="radio"/>    | <input type="radio"/> | <input type="radio"/>   | <input type="radio"/>     | <input type="radio"/>  | <input type="radio"/>      | <input type="radio"/>      |
| Other:<br>_____                                  | <input type="radio"/>    | <input type="radio"/> | <input type="radio"/>   | <input type="radio"/>     | <input type="radio"/>  | <input type="radio"/>      | <input type="radio"/>      |
| _____                                            | <input type="radio"/>    | <input type="radio"/> | <input type="radio"/>   | <input type="radio"/>     | <input type="radio"/>  | <input type="radio"/>      | <input type="radio"/>      |

### 8. How well do the following statements about the training with the Rat Simulator B apply?

|                                                                                 | Completely applies<br>1 | Largely applies<br>2  | Slightly applies<br>3 | Slightly does not apply<br>4 | Largely does not apply<br>5 | Does not apply at all<br>6 |
|---------------------------------------------------------------------------------|-------------------------|-----------------------|-----------------------|------------------------------|-----------------------------|----------------------------|
| I felt more secure in performing <b>handling and restraint</b> on the live rat. | <input type="radio"/>   | <input type="radio"/> | <input type="radio"/> | <input type="radio"/>        | <input type="radio"/>       | <input type="radio"/>      |
| I felt more secure in performing <b>procedural techniques</b> on the live rat.  | <input type="radio"/>   | <input type="radio"/> | <input type="radio"/> | <input type="radio"/>        | <input type="radio"/>       | <input type="radio"/>      |

| 9. How well did the Rat Simulator B prepare you for the entire course training on the live rat? |                       |                       |                       |                       |                       |
|-------------------------------------------------------------------------------------------------|-----------------------|-----------------------|-----------------------|-----------------------|-----------------------|
| Extremely good                                                                                  | Quite good            | Slightly good         | Slightly bad          | Quite bad             | Extremely bad         |
| 1                                                                                               | 2                     | 3                     | 4                     | 5                     | 6                     |
| <input type="radio"/>                                                                           | <input type="radio"/> | <input type="radio"/> | <input type="radio"/> | <input type="radio"/> | <input type="radio"/> |

| 10. How well did the Rat Simulator B prepare you for the following techniques in the course training on the live rat? |                       |                       |                       |                       |                       |                       |                            |
|-----------------------------------------------------------------------------------------------------------------------|-----------------------|-----------------------|-----------------------|-----------------------|-----------------------|-----------------------|----------------------------|
| Techniques                                                                                                            | Extremely good<br>1   | Quite good<br>2       | Slightly good<br>3    | Slightly bad<br>4     | Quite bad<br>5        | Extremely bad<br>6    | Technique was not trained. |
| Handling - transfer from cage to cage                                                                                 | <input type="radio"/>      |
| Restraint - scruffing                                                                                                 | <input type="radio"/>      |
| Restraint - over the shoulder grip                                                                                    | <input type="radio"/>      |
| Restraint - middle shoulder grip                                                                                      | <input type="radio"/>      |
| Restraint - under the shoulder grip                                                                                   | <input type="radio"/>      |
| Administration by oral gavage                                                                                         | <input type="radio"/>      |
| Intravenous administration via lateral tail vein                                                                      | <input type="radio"/>      |
| Blood sampling from lateral tail vein                                                                                 | <input type="radio"/>      |
| Other:                                                                                                                | <input type="radio"/>      |
|                                                                                                                       | <input type="radio"/>      |

| 11. What did you particularly like about the Rat Simulator B? |
|---------------------------------------------------------------|
| <br><br><br><br><br><br><br><br><br><br>                      |

| 12. What did you <u>not</u> like about the Rat Simulator B? |
|-------------------------------------------------------------|
| <br><br><br><br><br><br><br><br><br><br>                    |

| 13. What would you like to improve about the Rat Simulator B? |
|---------------------------------------------------------------|
| <br><br><br><br><br><br><br><br><br><br>                      |

14. Which species are you expecting to work with for scientific reasons in the next 6 months after you have passed the course?

Multiple answers for species are possible.

- |                                     |                                |                                          |
|-------------------------------------|--------------------------------|------------------------------------------|
| <input type="checkbox"/> Rat        | <input type="checkbox"/> Pig   | <input type="checkbox"/> Dog             |
| <input type="checkbox"/> Mouse      | <input type="checkbox"/> Sheep | <input type="checkbox"/> Cat             |
| <input type="checkbox"/> Rabbit     | <input type="checkbox"/> Goat  | <input type="checkbox"/> Other _____     |
| <input type="checkbox"/> Guinea pig | <input type="checkbox"/> Cow   | <input type="checkbox"/> None            |
| <input type="checkbox"/> Hamster    | <input type="checkbox"/> Horse | <input type="checkbox"/> I cannot judge. |

15. How old are you?

\_\_\_\_\_ years

**16. What is your gender?**

- ☐ Male
- ☐ Female
- ☐ Other
- ☐ No answer

**17. Please mark your highest educational degree you have achieved.**

Only one answer is possible.

- ☐ (Still) no qualification (yet)
- ☐ Apprenticeship/Vocational training
- ☐ Technical college qualification
- ☐ University of Applied Sciences Degree
- ☐ Bachelor's Degree
- ☐ Master's Degree, diploma or state examination
- ☐ Ph.D. /Doctoral degree
- ☐ Other: \_\_\_\_\_

**18. Please complete the sentence below.**

Only one answer is possible.

**I am participating in the course as ...**

- ☐ ...an academic employee.
- ☐ ...a technical assistant.
- ☐ ...an apprentice.
- ☐ ...a student.
- ☐ ...other: \_\_\_\_\_.

**19. What is your discipline?**

Only one answer is possible.

- ☐ Human Medicine
- ☐ Veterinary Medicine
- ☐ Dental Medicine
- ☐ Pharmacology
- ☐ Biology
- ☐ Chemistry
- ☐ Physics
- ☐ Biotechnology
- ☐ Nutritional Science
- ☐ Other: \_\_\_\_\_

**20. Had you already had experience ...**

Only one answer is possible.

**...in handling rats before the course?**

- ☐ Yes, a lot of.
- ☐ Yes, a little bit.
- ☐ No, not at all.

**21. Had you already had experience ...**

Only one answer is possible.

**...in handling mice before the course?**

- ☐ Yes, a lot of.
- ☐ Yes, a little bit.
- ☐ No, not at all.

**22. Had you already worked with other simulator(s) before the course?**

Multiple answers for simulators are possible. Please describe the model in brief.

- ☐ Yes, ...
  - ☐ ...with rat simulators: Model: \_\_\_\_\_
  - ☐ ...with mouse simulators: Model: \_\_\_\_\_
  - ☐ ...with other simulators: Model: \_\_\_\_\_
- ☐ No.

**Do you have any recommendations, praise or criticism? We highly appreciate your feedback!**

**Thank you very much for your participation!**

**The SimulRATor-Team**

**[web: www.simulator.de](http://www.simulator.de) mail: [kontakt@simulator.de](mailto:kontakt@simulator.de)**

# Welcome to „SimulRATor“!

## We invite you to take part in our survey on simulators in laboratory animal science.

**We are a team of scientists** of the Institutes of Veterinary Anatomy, of Animal Welfare, Animal Behavior and Laboratory Animal Science and of Veterinary Epidemiology and Biometry at the Department of Veterinary Medicine of the Freie Universität Berlin and **are evaluating all currently commercially available rat and mouse simulators in laboratory animal training courses for a research project.**

**Since you as a participant can evaluate best**, how good the training on the simulator and the preparation for the practical exercises on the live animal is, we would kindly ask you for **your personal feedback on the strengths and weaknesses of the simulators** on which you have trained in the course.

**Thank you very much for your participation!**

**The SimulRATor-Team**

Further information can be found at [www.simulrator.de](http://www.simulrator.de) or write to [kontakt@simulrator.de](mailto:kontakt@simulrator.de).

### Part 1 of 2 Rat Simulator C

ID: \_\_\_\_\_

← Please remember your ID for the 2<sup>nd</sup> part.  
**Thank you!**

Privacy Notice: Your participation in the survey is voluntary. The survey data is anonymously stored and managed. Under no circumstances will data be passed on to third parties. We collect no personal information from you. No conclusions on your participation are possible. Only the people involved in the research project have access to the information provided by you within the questionnaire and are obliged to maintain secrecy. The information provided is used for research purposes only. You can cancel the survey at any time without giving reasons.



| 1. How well were you able to apply the procedural techniques on the Rat Simulator C? |                       |                       |                       |                       |                       |                       |                            |
|--------------------------------------------------------------------------------------|-----------------------|-----------------------|-----------------------|-----------------------|-----------------------|-----------------------|----------------------------|
|                                                                                      | Extremely good        | Quite good            | Slightly good         | Slightly bad          | Quite bad             | Extremely bad         | Technique was not trained. |
| Techniques                                                                           | 1                     | 2                     | 3                     | 4                     | 5                     | 6                     |                            |
| Handling - transfer from cage to cage                                                | <input type="radio"/>      |
| Restraint - scruffing                                                                | <input type="radio"/>      |
| Restraint - over the shoulder grip                                                   | <input type="radio"/>      |
| Restraint - middle shoulder grip                                                     | <input type="radio"/>      |
| Restraint - under the shoulder grip                                                  | <input type="radio"/>      |
| Intravenous administration via lateral tail vein                                     | <input type="radio"/>      |
| Blood sampling from saphenous vein                                                   | <input type="radio"/>      |
| Blood sampling from lateral tail vein                                                | <input type="radio"/>      |
| Blood sampling from heart                                                            | <input type="radio"/>      |
| Other: _____                                                                         | <input type="radio"/>      |
| _____                                                                                | <input type="radio"/>      |

| 2. How well do the following statements about the training with the Rat Simulator C apply?        |                       |                       |                       |                         |                        |                       |
|---------------------------------------------------------------------------------------------------|-----------------------|-----------------------|-----------------------|-------------------------|------------------------|-----------------------|
|                                                                                                   | Completely applies    | Largely applies       | Slightly applies      | Slightly does not apply | Largely does not apply | Does not apply at all |
|                                                                                                   | 1                     | 2                     | 3                     | 4                       | 5                      | 6                     |
| The number of participants per Rat Simulator C was appropriate.                                   | <input type="radio"/> | <input type="radio"/> | <input type="radio"/> | <input type="radio"/>   | <input type="radio"/>  | <input type="radio"/> |
| The training duration on the Rat Simulator C was sufficient.                                      | <input type="radio"/> | <input type="radio"/> | <input type="radio"/> | <input type="radio"/>   | <input type="radio"/>  | <input type="radio"/> |
| The Rat Simulator C provides satisfactory training for the techniques.                            | <input type="radio"/> | <input type="radio"/> | <input type="radio"/> | <input type="radio"/>   | <input type="radio"/>  | <input type="radio"/> |
| By training with the Rat Simulator C, I feel better prepared for course training on the live rat. | <input type="radio"/> | <input type="radio"/> | <input type="radio"/> | <input type="radio"/>   | <input type="radio"/>  | <input type="radio"/> |

| 3. If there were material related difficulties using the Rat Simulator C, please give us a brief description of these. |
|------------------------------------------------------------------------------------------------------------------------|
| Technique: _____                                                                                                       |
| Description of the complication: _____                                                                                 |
| _____                                                                                                                  |
| Technique: _____                                                                                                       |
| Description of the complication: _____                                                                                 |
| _____                                                                                                                  |
| _____                                                                                                                  |

| Do you have any recommendations, praise or criticism? We highly appreciate your feedback! |
|-------------------------------------------------------------------------------------------|
| _____                                                                                     |
| _____                                                                                     |
| _____                                                                                     |
| _____                                                                                     |
| _____                                                                                     |

Thank you very much for your participation!

The SimulRATor-Team [kontakt@simulator.de](mailto:kontakt@simulator.de)

# Welcome to „SimulRATor“!

## We invite you to take part in our survey on simulators in laboratory animal science.

**We are a team of scientists** of the Institutes of Veterinary Anatomy, of Animal Welfare, Animal Behavior and Laboratory Animal Science and of Veterinary Epidemiology and Biometry at the Department of Veterinary Medicine of the Freie Universität Berlin and **are evaluating all currently commercially available rat and mouse simulators in laboratory animal training courses for a research project.**

**Since you as a participant can evaluate best**, how good the training on the simulator and the preparation for the practical exercises on the live animal is, we would kindly ask you for **your personal feedback on the strengths and weaknesses of the simulators** on which you have trained in the course.

**Thank you very much for your participation!**

### **The SimulRATor-Team**

Further information can be found at [www.simulrator.de](http://www.simulrator.de) or write to [kontakt@simulrator.de](mailto:kontakt@simulrator.de).

### Part 2 of 2 Rat Simulator C

ID: \_\_\_\_\_

Privacy Notice: Your participation in the survey is voluntary. The survey data is anonymously stored and managed. Under no circumstances will data be passed on to third parties. We collect no personal information from you. No conclusions on your participation are possible. Only the people involved in the research project have access to the information provided by you within the questionnaire and are obliged to maintain secrecy. The information provided is used for research purposes only. You can cancel the survey at any time without giving reasons.

| 1. How well were you able to manage handling, restraint, and ear punching on the live rat? |                       |                       |                       |                       |                       |                       |                            |
|--------------------------------------------------------------------------------------------|-----------------------|-----------------------|-----------------------|-----------------------|-----------------------|-----------------------|----------------------------|
| Techniques                                                                                 | Extremely good<br>1   | Quite good<br>2       | Slightly good<br>3    | Slightly bad<br>4     | Quite bad<br>5        | Extremely bad<br>6    | Technique was not trained. |
| Handling - transfer from cage to cage                                                      | <input type="radio"/>      |
| Restraint - scruffing                                                                      | <input type="radio"/>      |
| Restraint - over the shoulder grip                                                         | <input type="radio"/>      |
| Restraint - middle shoulder grip                                                           | <input type="radio"/>      |
| Restraint – under the shoulder grip                                                        | <input type="radio"/>      |
| Ear punching                                                                               | <input type="radio"/>      |
| Other:                                                                                     | <input type="radio"/>      |
|                                                                                            | <input type="radio"/>      |

| 2. How well were you able to manage the following procedural techniques on the live rat? |                       |                       |                       |                       |                       |                       |                       |                          |
|------------------------------------------------------------------------------------------|-----------------------|-----------------------|-----------------------|-----------------------|-----------------------|-----------------------|-----------------------|--------------------------|
| Please also tick the box in the last column if the rat was anesthetized for the method.  |                       |                       |                       |                       |                       |                       |                       |                          |
| Techniques                                                                               | Extremely good<br>1   | Quite good<br>2       | Slightly good<br>3    | Slightly bad<br>4     | Quite bad<br>5        | Extremely bad<br>6    | Not trained.          | Rat in anesthesia.       |
| Feeding the rat                                                                          | <input type="radio"/> | <input type="checkbox"/> |
| Administration by oral gavage                                                            | <input type="radio"/> | <input type="checkbox"/> |
| Subcutaneous administration under skin over the neck                                     | <input type="radio"/> | <input type="checkbox"/> |
| Subcutaneous administration under skin over the flank                                    | <input type="radio"/> | <input type="checkbox"/> |
| Intramuscular administration                                                             | <input type="radio"/> | <input type="checkbox"/> |
| Intraperitoneal administration                                                           | <input type="radio"/> | <input type="checkbox"/> |
| Intravenous administration via dorsal penis vein                                         | <input type="radio"/> | <input type="checkbox"/> |
| Intravenous administration via lateral tail vein                                         | <input type="radio"/> | <input type="checkbox"/> |
| Blood sampling from sublingual vein                                                      | <input type="radio"/> | <input type="checkbox"/> |
| Blood sampling from retro-orbital plexus                                                 | <input type="radio"/> | <input type="checkbox"/> |
| Blood sampling from saphenous vein                                                       | <input type="radio"/> | <input type="checkbox"/> |
| Blood sampling from lateral tail vein                                                    | <input type="radio"/> | <input type="checkbox"/> |
| Blood sampling from heart                                                                | <input type="radio"/> | <input type="checkbox"/> |
| Other:                                                                                   | <input type="radio"/> | <input type="checkbox"/> |
|                                                                                          | <input type="radio"/> | <input type="checkbox"/> |

| 3. Which <u>3 techniques</u> on the live rat are in your opinion particularly demanding for the performer?                                |       |
|-------------------------------------------------------------------------------------------------------------------------------------------|-------|
| Please name 3 techniques from <u>1<sup>st</sup></u> and <u>2<sup>nd</sup></u> question. Please specify the techniques <u>completely</u> . |       |
| 1.                                                                                                                                        | _____ |
| 2.                                                                                                                                        | _____ |
| 3.                                                                                                                                        | _____ |

| 4. Please select from the list below <u>the 5 techniques</u> on the live rat, for which you consider a preparatory training on simulators to be particularly useful. |                                                       |
|----------------------------------------------------------------------------------------------------------------------------------------------------------------------|-------------------------------------------------------|
| <u>Max. 5 techniques</u> can be chosen.                                                                                                                              |                                                       |
| <input type="checkbox"/>                                                                                                                                             | Handling - transfer from cage to cage                 |
| <input type="checkbox"/>                                                                                                                                             | Restraint (different techniques)                      |
| <input type="checkbox"/>                                                                                                                                             | Ear punching                                          |
| <input type="checkbox"/>                                                                                                                                             | Feeding the rat                                       |
| <input type="checkbox"/>                                                                                                                                             | Administration by oral gavage                         |
| <input type="checkbox"/>                                                                                                                                             | Subcutaneous administration under skin over the neck  |
| <input type="checkbox"/>                                                                                                                                             | Subcutaneous administration under skin over the flank |
| <input type="checkbox"/>                                                                                                                                             | Intramuscular administration                          |
| <input type="checkbox"/>                                                                                                                                             | Intraperitoneal administration                        |
| <input type="checkbox"/>                                                                                                                                             | Intravenous administration via dorsal penis vein      |
| <input type="checkbox"/>                                                                                                                                             | Intravenous administration via lateral tail vein      |
| <input type="checkbox"/>                                                                                                                                             | Blood sampling from sublingual vein                   |
| <input type="checkbox"/>                                                                                                                                             | Blood sampling from retro-orbital plexus              |
| <input type="checkbox"/>                                                                                                                                             | Blood sampling from saphenous vein                    |
| <input type="checkbox"/>                                                                                                                                             | Blood sampling from lateral tail vein                 |
| <input type="checkbox"/>                                                                                                                                             | Blood sampling from heart                             |

| 5. Would you also like to have a simulator training for <u>other</u> methods on the rat? |  |
|------------------------------------------------------------------------------------------|--|
| If so, please describe which technique(s) is/are important to you.                       |  |
|                                                                                          |  |

## Your personal feedback about the Rat Simulator C

### 6. How realistic are the following features of the Rat Simulator C in comparison to a live rat?

| Features                                                                                  | Extremely realistic<br>1 | Quite realistic<br>2  | Slightly realistic<br>3 | Slightly unrealistic<br>4 | Quite unrealistic<br>5 | Extremely unrealistic<br>6 |
|-------------------------------------------------------------------------------------------|--------------------------|-----------------------|-------------------------|---------------------------|------------------------|----------------------------|
| General appearance                                                                        | <input type="radio"/>    | <input type="radio"/> | <input type="radio"/>   | <input type="radio"/>     | <input type="radio"/>  | <input type="radio"/>      |
| Haptics  | <input type="radio"/>    | <input type="radio"/> | <input type="radio"/>   | <input type="radio"/>     | <input type="radio"/>  | <input type="radio"/>      |
| Movability of skin over neck                                                              | <input type="radio"/>    | <input type="radio"/> | <input type="radio"/>   | <input type="radio"/>     | <input type="radio"/>  | <input type="radio"/>      |
| Movability of skin over flank                                                             | <input type="radio"/>    | <input type="radio"/> | <input type="radio"/>   | <input type="radio"/>     | <input type="radio"/>  | <input type="radio"/>      |
| Consistency of skin surface                                                               | <input type="radio"/>    | <input type="radio"/> | <input type="radio"/>   | <input type="radio"/>     | <input type="radio"/>  | <input type="radio"/>      |
| Body height                                                                               | <input type="radio"/>    | <input type="radio"/> | <input type="radio"/>   | <input type="radio"/>     | <input type="radio"/>  | <input type="radio"/>      |
| Body weight                                                                               | <input type="radio"/>    | <input type="radio"/> | <input type="radio"/>   | <input type="radio"/>     | <input type="radio"/>  | <input type="radio"/>      |
| Body shape                                                                                | <input type="radio"/>    | <input type="radio"/> | <input type="radio"/>   | <input type="radio"/>     | <input type="radio"/>  | <input type="radio"/>      |
| Proportions                                                                               | <input type="radio"/>    | <input type="radio"/> | <input type="radio"/>   | <input type="radio"/>     | <input type="radio"/>  | <input type="radio"/>      |

### 7. How realistic was the training with the Rat Simulator C in comparison to a live rat for you?

| Techniques                                       | Extremely realistic<br>1 | Quite realistic<br>2  | Slightly realistic<br>3 | Slightly unrealistic<br>4 | Quite unrealistic<br>5 | Extremely unrealistic<br>6 | Technique was not trained. |
|--------------------------------------------------|--------------------------|-----------------------|-------------------------|---------------------------|------------------------|----------------------------|----------------------------|
| Handling - transfer from cage to cage            | <input type="radio"/>    | <input type="radio"/> | <input type="radio"/>   | <input type="radio"/>     | <input type="radio"/>  | <input type="radio"/>      | <input type="radio"/>      |
| Restraint - scruffing                            | <input type="radio"/>    | <input type="radio"/> | <input type="radio"/>   | <input type="radio"/>     | <input type="radio"/>  | <input type="radio"/>      | <input type="radio"/>      |
| Restraint - over the shoulder grip               | <input type="radio"/>    | <input type="radio"/> | <input type="radio"/>   | <input type="radio"/>     | <input type="radio"/>  | <input type="radio"/>      | <input type="radio"/>      |
| Restraint - middle shoulder grip                 | <input type="radio"/>    | <input type="radio"/> | <input type="radio"/>   | <input type="radio"/>     | <input type="radio"/>  | <input type="radio"/>      | <input type="radio"/>      |
| Restraint - under the shoulder grip              | <input type="radio"/>    | <input type="radio"/> | <input type="radio"/>   | <input type="radio"/>     | <input type="radio"/>  | <input type="radio"/>      | <input type="radio"/>      |
| Intravenous administration via lateral tail vein | <input type="radio"/>    | <input type="radio"/> | <input type="radio"/>   | <input type="radio"/>     | <input type="radio"/>  | <input type="radio"/>      | <input type="radio"/>      |
| Blood sampling from saphenous vein               | <input type="radio"/>    | <input type="radio"/> | <input type="radio"/>   | <input type="radio"/>     | <input type="radio"/>  | <input type="radio"/>      | <input type="radio"/>      |
| Blood sampling from lateral tail vein            | <input type="radio"/>    | <input type="radio"/> | <input type="radio"/>   | <input type="radio"/>     | <input type="radio"/>  | <input type="radio"/>      | <input type="radio"/>      |
| Blood sampling from heart                        | <input type="radio"/>    | <input type="radio"/> | <input type="radio"/>   | <input type="radio"/>     | <input type="radio"/>  | <input type="radio"/>      | <input type="radio"/>      |
| Other:<br>_____                                  | <input type="radio"/>    | <input type="radio"/> | <input type="radio"/>   | <input type="radio"/>     | <input type="radio"/>  | <input type="radio"/>      | <input type="radio"/>      |
| _____                                            | <input type="radio"/>    | <input type="radio"/> | <input type="radio"/>   | <input type="radio"/>     | <input type="radio"/>  | <input type="radio"/>      | <input type="radio"/>      |

### 8. How well do the following statements about the training with the Rat Simulator C apply?

|                                                                                 | Completely applies<br>1 | Largely applies<br>2  | Slightly applies<br>3 | Slightly does not apply<br>4 | Largely does not apply<br>5 | Does not apply at all<br>6 |
|---------------------------------------------------------------------------------|-------------------------|-----------------------|-----------------------|------------------------------|-----------------------------|----------------------------|
| I felt more secure in performing <b>handling and restraint</b> on the live rat. | <input type="radio"/>   | <input type="radio"/> | <input type="radio"/> | <input type="radio"/>        | <input type="radio"/>       | <input type="radio"/>      |
| I felt more secure in performing <b>procedural techniques</b> on the live rat.  | <input type="radio"/>   | <input type="radio"/> | <input type="radio"/> | <input type="radio"/>        | <input type="radio"/>       | <input type="radio"/>      |

| 9. How well did the Rat Simulator C prepare you for the entire course training on the live rat? |            |               |              |           |               |
|-------------------------------------------------------------------------------------------------|------------|---------------|--------------|-----------|---------------|
| Extremely good                                                                                  | Quite good | Slightly good | Slightly bad | Quite bad | Extremely bad |
| 1                                                                                               | 2          | 3             | 4            | 5         | 6             |
| ○                                                                                               | ○          | ○             | ○            | ○         | ○             |

| 10. How well did the Rat Simulator C prepare you for the following techniques in the course training on the live rat? |                     |                 |                    |                   |                |                    |                            |
|-----------------------------------------------------------------------------------------------------------------------|---------------------|-----------------|--------------------|-------------------|----------------|--------------------|----------------------------|
| Techniques                                                                                                            | Extremely good<br>1 | Quite good<br>2 | Slightly good<br>3 | Slightly bad<br>4 | Quite bad<br>5 | Extremely bad<br>6 | Technique was not trained. |
| Handling - transfer from cage to cage                                                                                 | ○                   | ○               | ○                  | ○                 | ○              | ○                  | ○                          |
| Restraint - scruffing                                                                                                 | ○                   | ○               | ○                  | ○                 | ○              | ○                  | ○                          |
| Restraint - over the shoulder grip                                                                                    | ○                   | ○               | ○                  | ○                 | ○              | ○                  | ○                          |
| Restraint - middle shoulder grip                                                                                      | ○                   | ○               | ○                  | ○                 | ○              | ○                  | ○                          |
| Restraint - under the shoulder grip                                                                                   | ○                   | ○               | ○                  | ○                 | ○              | ○                  | ○                          |
| Intravenous administration via lateral tail vein                                                                      | ○                   | ○               | ○                  | ○                 | ○              | ○                  | ○                          |
| Blood sampling from saphenous vein                                                                                    | ○                   | ○               | ○                  | ○                 | ○              | ○                  | ○                          |
| Blood sampling from lateral tail vein                                                                                 | ○                   | ○               | ○                  | ○                 | ○              | ○                  | ○                          |
| Blood sampling from heart                                                                                             | ○                   | ○               | ○                  | ○                 | ○              | ○                  | ○                          |
| Other:                                                                                                                | ○                   | ○               | ○                  | ○                 | ○              | ○                  | ○                          |
|                                                                                                                       | ○                   | ○               | ○                  | ○                 | ○              | ○                  | ○                          |

| 11. What did you particularly like about the Rat Simulator C? |
|---------------------------------------------------------------|
|                                                               |

| 12. What did you <u>not</u> like about the Rat Simulator C? |
|-------------------------------------------------------------|
|                                                             |

| 13. What would you like to improve about the Rat Simulator C? |
|---------------------------------------------------------------|
|                                                               |

14. Which species are you expecting to work with for scientific reasons in the next 6 months after you have passed the course?

Multiple answers for species are possible.

- |                                     |                                |                                          |
|-------------------------------------|--------------------------------|------------------------------------------|
| <input type="checkbox"/> Rat        | <input type="checkbox"/> Pig   | <input type="checkbox"/> Dog             |
| <input type="checkbox"/> Mouse      | <input type="checkbox"/> Sheep | <input type="checkbox"/> Cat             |
| <input type="checkbox"/> Rabbit     | <input type="checkbox"/> Goat  | <input type="checkbox"/> Other _____     |
| <input type="checkbox"/> Guinea pig | <input type="checkbox"/> Cow   | <input type="checkbox"/> None            |
| <input type="checkbox"/> Hamster    | <input type="checkbox"/> Horse | <input type="checkbox"/> I cannot judge. |

15. How old are you?

\_\_\_\_\_ years

**16. What is your gender?**

- ☐ Male
- ☐ Female
- ☐ Other
- ☐ No answer

**17. Please mark your highest educational degree you have achieved.**

Only one answer is possible.

- ☐ (Still) no qualification (yet)
- ☐ Apprenticeship/Vocational training
- ☐ Technical college qualification
- ☐ University of Applied Sciences Degree
- ☐ Bachelor's Degree
- ☐ Master's Degree, diploma or state examination
- ☐ Ph.D. /Doctoral degree
- ☐ Other: \_\_\_\_\_

**18. Please complete the sentence below.**

Only one answer is possible.

**I am participating in the course as ...**

- ☐ ...an academic employee.
- ☐ ...a technical assistant.
- ☐ ...an apprentice.
- ☐ ...a student.
- ☐ ...other: \_\_\_\_\_.

**19. What is your discipline?**

Only one answer is possible.

- ☐ Human Medicine
- ☐ Veterinary Medicine
- ☐ Dental Medicine
- ☐ Pharmacology
- ☐ Biology
- ☐ Chemistry
- ☐ Physics
- ☐ Biotechnology
- ☐ Nutritional Science
- ☐ Other: \_\_\_\_\_

**20. Had you already had experience ...**

Only one answer is possible.

**...in handling rats before the course?**

- ☐ Yes, a lot of.
- ☐ Yes, a little bit.
- ☐ No, not at all.

**21. Had you already had experience ...**

Only one answer is possible.

**...in handling mice before the course?**

- ☐ Yes, a lot of.
- ☐ Yes, a little bit.
- ☐ No, not at all.

**22. Had you already worked with other simulator(s) before the course?**

Multiple answers for simulators are possible. Please describe the model in brief.

- ☐ Yes, ...
  - ☐ ...with rat simulators: Model: \_\_\_\_\_
  - ☐ ...with mouse simulators: Model: \_\_\_\_\_
  - ☐ ...with other simulators: Model: \_\_\_\_\_
- ☐ No.

**Do you have any recommendations, praise or criticism? We highly appreciate your feedback!**

**Thank you very much for your participation!**

**The SimulRATor-Team**

**[web: www.simulator.de](http://www.simulator.de) mail: [kontakt@simulator.de](mailto:kontakt@simulator.de)**

# Welcome to „SimulRATor“!

## We invite you to take part in our survey on simulators in laboratory animal science.

**We are a team of scientists** of the Institutes of Veterinary Anatomy, of Animal Welfare, Animal Behavior and Laboratory Animal Science and of Veterinary Epidemiology and Biometry at the Department of Veterinary Medicine of the Freie Universität Berlin and **are evaluating all currently commercially available rat and mouse simulators in laboratory animal training courses for a research project.**

**Since you as a participant can evaluate best**, how good the training on the simulator and the preparation for the practical exercises on the live animal is, we would kindly ask you for **your personal feedback on the strengths and weaknesses of the simulators** on which you have trained in the course.

**Thank you very much for your participation!**

**The SimulRATor-Team**

Further information can be found at [www.simulrator.de](http://www.simulrator.de) or write to [kontakt@simulrator.de](mailto:kontakt@simulrator.de).

### Part 1 of 2 Rat Simulator D

ID: \_\_\_\_\_

← Please remember your ID for the 2<sup>nd</sup> part.  
**Thank you!**

Privacy Notice: Your participation in the survey is voluntary. The survey data is anonymously stored and managed. Under no circumstances will data be passed on to third parties. We collect no personal information from you. No conclusions on your participation are possible. Only the people involved in the research project have access to the information provided by you within the questionnaire and are obliged to maintain secrecy. The information provided is used for research purposes only. You can cancel the survey at any time without giving reasons.

**1. How well were you able to apply the procedural techniques on the Rat Simulator D?**

| Techniques                                       | Extremely good<br>1 | Quite good<br>2 | Slightly good<br>3 | Slightly bad<br>4 | Quite bad<br>5 | Extremely bad<br>6 | Technique was not trained. |
|--------------------------------------------------|---------------------|-----------------|--------------------|-------------------|----------------|--------------------|----------------------------|
| Handling - transfer from cage to cage            | O                   | O               | O                  | O                 | O              | O                  | O                          |
| Restraint - scruffing                            | O                   | O               | O                  | O                 | O              | O                  | O                          |
| Restraint - over the shoulder grip               | O                   | O               | O                  | O                 | O              | O                  | O                          |
| Restraint - middle shoulder grip                 | O                   | O               | O                  | O                 | O              | O                  | O                          |
| Restraint - under the shoulder grip              | O                   | O               | O                  | O                 | O              | O                  | O                          |
| Ear punching                                     | O                   | O               | O                  | O                 | O              | O                  | O                          |
| Intravenous administration via lateral tail vein | O                   | O               | O                  | O                 | O              | O                  | O                          |
| Blood sampling from lateral tail vein            | O                   | O               | O                  | O                 | O              | O                  | O                          |
| Other:                                           | O                   | O               | O                  | O                 | O              | O                  | O                          |
|                                                  | O                   | O               | O                  | O                 | O              | O                  | O                          |

**2. How well do the following statements about the training with the Rat Simulator D apply?**

[illegible]

3. If there were material related difficulties using the Rat Simulator D, please give us a brief description of these.

**Technique:** \_\_\_\_\_

**Description of the complication:** \_\_\_\_\_

**Technique:** \_\_\_\_\_

**Description of the complication:** \_\_\_\_\_

**Do you have any recommendations, praise or criticism? We highly appreciate your feedback!**

**Thank you very much for your participation!**

The SimulRATor-Team [kontakt@simulator.de](mailto:kontakt@simulator.de)



# Welcome to „SimulRATor“!

## We invite you to take part in our survey on simulators in laboratory animal science.

**We are a team of scientists** of the Institutes of Veterinary Anatomy, of Animal Welfare, Animal Behavior and Laboratory Animal Science and of Veterinary Epidemiology and Biometry at the Department of Veterinary Medicine of the Freie Universität Berlin and **are evaluating all currently commercially available rat and mouse simulators in laboratory animal training courses for a research project.**

**Since you as a participant can evaluate best**, how good the training on the simulator and the preparation for the practical exercises on the live animal is, we would kindly ask you for **your personal feedback on the strengths and weaknesses of the simulators** on which you have trained in the course.

**Thank you very much for your participation!**

### **The SimulRATor-Team**

Further information can be found at [www.simulrator.de](http://www.simulrator.de) or write to [kontakt@simulrator.de](mailto:kontakt@simulrator.de).

### Part 2 of 2 Rat Simulator D

ID: \_\_\_\_\_

Privacy Notice: Your participation in the survey is voluntary. The survey data is anonymously stored and managed. Under no circumstances will data be passed on to third parties. We collect no personal information from you. No conclusions on your participation are possible. Only the people involved in the research project have access to the information provided by you within the questionnaire and are obliged to maintain secrecy. The information provided is used for research purposes only. You can cancel the survey at any time without giving reasons.

| 1. How well were you able to manage handling, restraint, and ear punching on the live rat? |                       |                       |                       |                       |                       |                       |                            |
|--------------------------------------------------------------------------------------------|-----------------------|-----------------------|-----------------------|-----------------------|-----------------------|-----------------------|----------------------------|
| Techniques                                                                                 | Extremely good<br>1   | Quite good<br>2       | Slightly good<br>3    | Slightly bad<br>4     | Quite bad<br>5        | Extremely bad<br>6    | Technique was not trained. |
| Handling - transfer from cage to cage                                                      | <input type="radio"/>      |
| Restraint - scruffing                                                                      | <input type="radio"/>      |
| Restraint - over the shoulder grip                                                         | <input type="radio"/>      |
| Restraint - middle shoulder grip                                                           | <input type="radio"/>      |
| Restraint – under the shoulder grip                                                        | <input type="radio"/>      |
| Ear punching                                                                               | <input type="radio"/>      |
| Other:                                                                                     | <input type="radio"/>      |
|                                                                                            | <input type="radio"/>      |

| 2. How well were you able to manage the following procedural techniques on the live rat? |                       |                       |                       |                       |                       |                       |                       |                          |
|------------------------------------------------------------------------------------------|-----------------------|-----------------------|-----------------------|-----------------------|-----------------------|-----------------------|-----------------------|--------------------------|
| Please also tick the box in the last column if the rat was anesthetized for the method.  |                       |                       |                       |                       |                       |                       |                       |                          |
| Techniques                                                                               | Extremely good<br>1   | Quite good<br>2       | Slightly good<br>3    | Slightly bad<br>4     | Quite bad<br>5        | Extremely bad<br>6    | Not trained.          | Rat in anesthesia.       |
| Feeding the rat                                                                          | <input type="radio"/> | <input type="checkbox"/> |
| Administration by oral gavage                                                            | <input type="radio"/> | <input type="checkbox"/> |
| Subcutaneous administration under skin over the neck                                     | <input type="radio"/> | <input type="checkbox"/> |
| Subcutaneous administration under skin over the flank                                    | <input type="radio"/> | <input type="checkbox"/> |
| Intramuscular administration                                                             | <input type="radio"/> | <input type="checkbox"/> |
| Intraperitoneal administration                                                           | <input type="radio"/> | <input type="checkbox"/> |
| Intravenous administration via dorsal penis vein                                         | <input type="radio"/> | <input type="checkbox"/> |
| Intravenous administration via lateral tail vein                                         | <input type="radio"/> | <input type="checkbox"/> |
| Blood sampling from sublingual vein                                                      | <input type="radio"/> | <input type="checkbox"/> |
| Blood sampling from retro-orbital plexus                                                 | <input type="radio"/> | <input type="checkbox"/> |
| Blood sampling from saphenous vein                                                       | <input type="radio"/> | <input type="checkbox"/> |
| Blood sampling from lateral tail vein                                                    | <input type="radio"/> | <input type="checkbox"/> |
| Blood sampling from heart                                                                | <input type="radio"/> | <input type="checkbox"/> |
| Other:                                                                                   | <input type="radio"/> | <input type="checkbox"/> |
|                                                                                          | <input type="radio"/> | <input type="checkbox"/> |

| 3. Which <u>3 techniques</u> on the live rat are in your opinion particularly demanding for the performer?                                |       |
|-------------------------------------------------------------------------------------------------------------------------------------------|-------|
| Please name 3 techniques from <u>1<sup>st</sup></u> and <u>2<sup>nd</sup></u> question. Please specify the techniques <u>completely</u> . |       |
| 1.                                                                                                                                        | _____ |
| 2.                                                                                                                                        | _____ |
| 3.                                                                                                                                        | _____ |

| 4. Please select from the list below <u>the 5 techniques</u> on the live rat, for which you consider a preparatory training on simulators to be particularly useful. |                                                       |
|----------------------------------------------------------------------------------------------------------------------------------------------------------------------|-------------------------------------------------------|
| <u>Max. 5 techniques</u> can be chosen.                                                                                                                              |                                                       |
| <input type="checkbox"/>                                                                                                                                             | Handling - transfer from cage to cage                 |
| <input type="checkbox"/>                                                                                                                                             | Restraint (different techniques)                      |
| <input type="checkbox"/>                                                                                                                                             | Ear punching                                          |
| <input type="checkbox"/>                                                                                                                                             | Feeding the rat                                       |
| <input type="checkbox"/>                                                                                                                                             | Administration by oral gavage                         |
| <input type="checkbox"/>                                                                                                                                             | Subcutaneous administration under skin over the neck  |
| <input type="checkbox"/>                                                                                                                                             | Subcutaneous administration under skin over the flank |
| <input type="checkbox"/>                                                                                                                                             | Intramuscular administration                          |
| <input type="checkbox"/>                                                                                                                                             | Intraperitoneal administration                        |
| <input type="checkbox"/>                                                                                                                                             | Intravenous administration via dorsal penis vein      |
| <input type="checkbox"/>                                                                                                                                             | Intravenous administration via lateral tail vein      |
| <input type="checkbox"/>                                                                                                                                             | Blood sampling from sublingual vein                   |
| <input type="checkbox"/>                                                                                                                                             | Blood sampling from retro-orbital plexus              |
| <input type="checkbox"/>                                                                                                                                             | Blood sampling from saphenous vein                    |
| <input type="checkbox"/>                                                                                                                                             | Blood sampling from lateral tail vein                 |
| <input type="checkbox"/>                                                                                                                                             | Blood sampling from heart                             |

| 5. Would you also like to have a simulator training for <u>other</u> methods on the rat? |  |
|------------------------------------------------------------------------------------------|--|
| If so, please describe which technique(s) is/are important to you.                       |  |
|                                                                                          |  |

## Your personal feedback about the Rat Simulator D

### 6. How realistic are the following features of the Rat Simulator D in comparison to a live rat?

| Features                                                                                  | Extremely realistic<br>1 | Quite realistic<br>2  | Slightly realistic<br>3 | Slightly unrealistic<br>4 | Quite unrealistic<br>5 | Extremely unrealistic<br>6 |
|-------------------------------------------------------------------------------------------|--------------------------|-----------------------|-------------------------|---------------------------|------------------------|----------------------------|
| General appearance                                                                        | <input type="radio"/>    | <input type="radio"/> | <input type="radio"/>   | <input type="radio"/>     | <input type="radio"/>  | <input type="radio"/>      |
| Haptics  | <input type="radio"/>    | <input type="radio"/> | <input type="radio"/>   | <input type="radio"/>     | <input type="radio"/>  | <input type="radio"/>      |
| Movability of skin over neck                                                              | <input type="radio"/>    | <input type="radio"/> | <input type="radio"/>   | <input type="radio"/>     | <input type="radio"/>  | <input type="radio"/>      |
| Movability of skin over flank                                                             | <input type="radio"/>    | <input type="radio"/> | <input type="radio"/>   | <input type="radio"/>     | <input type="radio"/>  | <input type="radio"/>      |
| Consistency of skin surface                                                               | <input type="radio"/>    | <input type="radio"/> | <input type="radio"/>   | <input type="radio"/>     | <input type="radio"/>  | <input type="radio"/>      |
| Body height                                                                               | <input type="radio"/>    | <input type="radio"/> | <input type="radio"/>   | <input type="radio"/>     | <input type="radio"/>  | <input type="radio"/>      |
| Body weight                                                                               | <input type="radio"/>    | <input type="radio"/> | <input type="radio"/>   | <input type="radio"/>     | <input type="radio"/>  | <input type="radio"/>      |
| Body shape                                                                                | <input type="radio"/>    | <input type="radio"/> | <input type="radio"/>   | <input type="radio"/>     | <input type="radio"/>  | <input type="radio"/>      |
| Proportions                                                                               | <input type="radio"/>    | <input type="radio"/> | <input type="radio"/>   | <input type="radio"/>     | <input type="radio"/>  | <input type="radio"/>      |

### 7. How realistic was the training with the Rat Simulator D in comparison to a live rat for you?

| Techniques                                       | Extremely realistic<br>1 | Quite realistic<br>2  | Slightly realistic<br>3 | Slightly unrealistic<br>4 | Quite unrealistic<br>5 | Extremely unrealistic<br>6 | Technique was not trained. |
|--------------------------------------------------|--------------------------|-----------------------|-------------------------|---------------------------|------------------------|----------------------------|----------------------------|
| Handling - transfer from cage to cage            | <input type="radio"/>    | <input type="radio"/> | <input type="radio"/>   | <input type="radio"/>     | <input type="radio"/>  | <input type="radio"/>      | <input type="radio"/>      |
| Restraint - scruffing                            | <input type="radio"/>    | <input type="radio"/> | <input type="radio"/>   | <input type="radio"/>     | <input type="radio"/>  | <input type="radio"/>      | <input type="radio"/>      |
| Restraint - over the shoulder grip               | <input type="radio"/>    | <input type="radio"/> | <input type="radio"/>   | <input type="radio"/>     | <input type="radio"/>  | <input type="radio"/>      | <input type="radio"/>      |
| Restraint - middle shoulder grip                 | <input type="radio"/>    | <input type="radio"/> | <input type="radio"/>   | <input type="radio"/>     | <input type="radio"/>  | <input type="radio"/>      | <input type="radio"/>      |
| Restraint - under the shoulder grip              | <input type="radio"/>    | <input type="radio"/> | <input type="radio"/>   | <input type="radio"/>     | <input type="radio"/>  | <input type="radio"/>      | <input type="radio"/>      |
| Ear punching                                     | <input type="radio"/>    | <input type="radio"/> | <input type="radio"/>   | <input type="radio"/>     | <input type="radio"/>  | <input type="radio"/>      | <input type="radio"/>      |
| Intravenous administration via lateral tail vein | <input type="radio"/>    | <input type="radio"/> | <input type="radio"/>   | <input type="radio"/>     | <input type="radio"/>  | <input type="radio"/>      | <input type="radio"/>      |
| Blood sampling from lateral tail vein            | <input type="radio"/>    | <input type="radio"/> | <input type="radio"/>   | <input type="radio"/>     | <input type="radio"/>  | <input type="radio"/>      | <input type="radio"/>      |
| Other:<br>_____                                  | <input type="radio"/>    | <input type="radio"/> | <input type="radio"/>   | <input type="radio"/>     | <input type="radio"/>  | <input type="radio"/>      | <input type="radio"/>      |
| _____                                            | <input type="radio"/>    | <input type="radio"/> | <input type="radio"/>   | <input type="radio"/>     | <input type="radio"/>  | <input type="radio"/>      | <input type="radio"/>      |

### 8. How well do the following statements about the training with the Rat Simulator D apply?

|                                                                                 | Completely applies<br>1 | Largely applies<br>2  | Slightly applies<br>3 | Slightly does not apply<br>4 | Largely does not apply<br>5 | Does not apply at all<br>6 |
|---------------------------------------------------------------------------------|-------------------------|-----------------------|-----------------------|------------------------------|-----------------------------|----------------------------|
| I felt more secure in performing <b>handling and restraint</b> on the live rat. | <input type="radio"/>   | <input type="radio"/> | <input type="radio"/> | <input type="radio"/>        | <input type="radio"/>       | <input type="radio"/>      |
| I felt more secure in performing <b>procedural techniques</b> on the live rat.  | <input type="radio"/>   | <input type="radio"/> | <input type="radio"/> | <input type="radio"/>        | <input type="radio"/>       | <input type="radio"/>      |

| 9. How well did the Rat Simulator D prepare you for the entire course training on the live rat? |                       |                       |                       |                       |                       |
|-------------------------------------------------------------------------------------------------|-----------------------|-----------------------|-----------------------|-----------------------|-----------------------|
| Extremely good                                                                                  | Quite good            | Slightly good         | Slightly bad          | Quite bad             | Extremely bad         |
| 1                                                                                               | 2                     | 3                     | 4                     | 5                     | 6                     |
| <input type="radio"/>                                                                           | <input type="radio"/> | <input type="radio"/> | <input type="radio"/> | <input type="radio"/> | <input type="radio"/> |

| 10. How well did the Rat Simulator D prepare you for the following techniques in the course training on the live rat? |                       |                       |                       |                       |                       |                       |                            |
|-----------------------------------------------------------------------------------------------------------------------|-----------------------|-----------------------|-----------------------|-----------------------|-----------------------|-----------------------|----------------------------|
| Techniques                                                                                                            | Extremely good<br>1   | Quite good<br>2       | Slightly good<br>3    | Slightly bad<br>4     | Quite bad<br>5        | Extremely bad<br>6    | Technique was not trained. |
| Handling - transfer from cage to cage                                                                                 | <input type="radio"/>      |
| Restraint - scruffing                                                                                                 | <input type="radio"/>      |
| Restraint - over the shoulder grip                                                                                    | <input type="radio"/>      |
| Restraint - middle shoulder grip                                                                                      | <input type="radio"/>      |
| Restraint - under the shoulder grip                                                                                   | <input type="radio"/>      |
| Ear punching                                                                                                          | <input type="radio"/>      |
| Intravenous administration via lateral tail vein                                                                      | <input type="radio"/>      |
| Blood sampling from lateral tail vein                                                                                 | <input type="radio"/>      |
| Other:                                                                                                                | <input type="radio"/>      |
|                                                                                                                       | <input type="radio"/>      |

| 11. What did you particularly like about the Rat Simulator D? |
|---------------------------------------------------------------|
| <br><br><br><br><br><br><br><br><br><br>                      |

| 12. What did you <u>not</u> like about the Rat Simulator D? |
|-------------------------------------------------------------|
| <br><br><br><br><br><br><br><br><br><br>                    |

| 13. What would you like to improve about the Rat Simulator D? |
|---------------------------------------------------------------|
| <br><br><br><br><br><br><br><br><br><br>                      |

14. Which species are you expecting to work with for scientific reasons in the next 6 months after you have passed the course?

Multiple answers for species are possible.

- |                                     |                                |                                          |
|-------------------------------------|--------------------------------|------------------------------------------|
| <input type="checkbox"/> Rat        | <input type="checkbox"/> Pig   | <input type="checkbox"/> Dog             |
| <input type="checkbox"/> Mouse      | <input type="checkbox"/> Sheep | <input type="checkbox"/> Cat             |
| <input type="checkbox"/> Rabbit     | <input type="checkbox"/> Goat  | <input type="checkbox"/> Other _____     |
| <input type="checkbox"/> Guinea pig | <input type="checkbox"/> Cow   | <input type="checkbox"/> None            |
| <input type="checkbox"/> Hamster    | <input type="checkbox"/> Horse | <input type="checkbox"/> I cannot judge. |

15. How old are you?

\_\_\_\_\_ years

**16. What is your gender?**

- ☐ Male
- ☐ Female
- ☐ Other
- ☐ No answer

**17. Please mark your highest educational degree you have achieved.**

Only one answer is possible.

- ☐ (Still) no qualification (yet)
- ☐ Apprenticeship/Vocational training
- ☐ Technical college qualification
- ☐ University of Applied Sciences Degree
- ☐ Bachelor's Degree
- ☐ Master's Degree, diploma or state examination
- ☐ Ph.D. /Doctoral degree
- ☐ Other: \_\_\_\_\_

**18. Please complete the sentence below.**

Only one answer is possible.

**I am participating in the course as ...**

- ☐ ...an academic employee.
- ☐ ...a technical assistant.
- ☐ ...an apprentice.
- ☐ ...a student.
- ☐ ...other: \_\_\_\_\_.

**19. What is your discipline?**

Only one answer is possible.

- ☐ Human Medicine
- ☐ Veterinary Medicine
- ☐ Dental Medicine
- ☐ Pharmacology
- ☐ Biology
- ☐ Chemistry
- ☐ Physics
- ☐ Biotechnology
- ☐ Nutritional Science
- ☐ Other: \_\_\_\_\_

**20. Had you already had experience ...**

Only one answer is possible.

**...in handling rats before the course?**

- ☐ Yes, a lot of.
- ☐ Yes, a little bit.
- ☐ No, not at all.

**21. Had you already had experience ...**

Only one answer is possible.

**...in handling mice before the course?**

- ☐ Yes, a lot of.
- ☐ Yes, a little bit.
- ☐ No, not at all.

**22. Had you already worked with other simulator(s) before the course?**

Multiple answers for simulators are possible. Please describe the model in brief.

- ☐ Yes, ...
  - ☐ ...with rat simulators: Model: \_\_\_\_\_
  - ☐ ...with mouse simulators: Model: \_\_\_\_\_
  - ☐ ...with other simulators: Model: \_\_\_\_\_
- ☐ No.

**Do you have any recommendations, praise or criticism? We highly appreciate your feedback!**

**Thank you very much for your participation!**

**The SimulRATor-Team**

**[web: www.simulator.de](http://www.simulator.de) mail: [kontakt@simulator.de](mailto:kontakt@simulator.de)**

# Welcome to „SimulRATor“!

## We invite you to take part in our survey on simulators in laboratory animal science.

**We are a team of scientists** of the Institutes of Veterinary Anatomy, of Animal Welfare, Animal Behavior and Laboratory Animal Science and of Veterinary Epidemiology and Biometry at the Department of Veterinary Medicine of the Freie Universität Berlin and **are evaluating all currently commercially available rat and mouse simulators in laboratory animal training courses for a research project.**

**Since you as a participant can evaluate best**, how good the training on the simulator and the preparation for the practical exercises on the live animal is, we would kindly ask you for **your personal feedback on the strengths and weaknesses of the simulators** on which you have trained in the course.

**Thank you very much for your participation!**

**The SimulRATor-Team**

Further information can be found at [www.simulrator.de](http://www.simulrator.de) or write to [kontakt@simulrator.de](mailto:kontakt@simulrator.de).

### Part 1 of 2 Rat Simulator E

ID: \_\_\_\_\_

← Please remember your ID for the 2<sup>nd</sup> part.  
**Thank you!**

Privacy Notice: Your participation in the survey is voluntary. The survey data is anonymously stored and managed. Under no circumstances will data be passed on to third parties. We collect no personal information from you. No conclusions on your participation are possible. Only the people involved in the research project have access to the information provided by you within the questionnaire and are obliged to maintain secrecy. The information provided is used for research purposes only. You can cancel the survey at any time without giving reasons.

| 1. How well were you able to apply the procedural techniques on the Rat Simulator E? |                       |                       |                       |                       |                       |                       |                            |
|--------------------------------------------------------------------------------------|-----------------------|-----------------------|-----------------------|-----------------------|-----------------------|-----------------------|----------------------------|
|                                                                                      | Extremely good        | Quite good            | Slightly good         | Slightly bad          | Quite bad             | Extremely bad         | Technique was not trained. |
| Techniques                                                                           | 1                     | 2                     | 3                     | 4                     | 5                     | 6                     |                            |
| Handling - transfer from cage to cage                                                | <input type="radio"/>      |
| Restraint - scruffing                                                                | <input type="radio"/>      |
| Restraint - over the shoulder grip                                                   | <input type="radio"/>      |
| Restraint - middle shoulder grip                                                     | <input type="radio"/>      |
| Restraint - under the shoulder grip                                                  | <input type="radio"/>      |
| Administration by oral gavage                                                        | <input type="radio"/>      |
| Subcutaneous administration under skin over the neck                                 | <input type="radio"/>      |
| Subcutaneous administration under skin over the flank                                | <input type="radio"/>      |
| Intramuscular administration                                                         | <input type="radio"/>      |
| Intravenous administration via lateral tail vein                                     | <input type="radio"/>      |
| Blood sampling from lateral tail vein                                                | <input type="radio"/>      |
| Other:                                                                               | <input type="radio"/>      |
|                                                                                      | <input type="radio"/>      |

| 2. How well do the following statements about the training with the Rat Simulator E apply?        |                       |                       |                       |                         |                        |                       |
|---------------------------------------------------------------------------------------------------|-----------------------|-----------------------|-----------------------|-------------------------|------------------------|-----------------------|
|                                                                                                   | Completely applies    | Largely applies       | Slightly applies      | Slightly does not apply | Largely does not apply | Does not apply at all |
|                                                                                                   | 1                     | 2                     | 3                     | 4                       | 5                      | 6                     |
| The number of participants per Rat Simulator E was appropriate.                                   | <input type="radio"/> | <input type="radio"/> | <input type="radio"/> | <input type="radio"/>   | <input type="radio"/>  | <input type="radio"/> |
| The training duration on the Rat Simulator E was sufficient.                                      | <input type="radio"/> | <input type="radio"/> | <input type="radio"/> | <input type="radio"/>   | <input type="radio"/>  | <input type="radio"/> |
| The Rat Simulator E provides satisfactory training for the techniques.                            | <input type="radio"/> | <input type="radio"/> | <input type="radio"/> | <input type="radio"/>   | <input type="radio"/>  | <input type="radio"/> |
| By training with the Rat Simulator E, I feel better prepared for course training on the live rat. | <input type="radio"/> | <input type="radio"/> | <input type="radio"/> | <input type="radio"/>   | <input type="radio"/>  | <input type="radio"/> |

| 3. If there were material related difficulties using the Rat Simulator E, please give us a brief description of these. |
|------------------------------------------------------------------------------------------------------------------------|
| Technique: _____                                                                                                       |
| Description of the complication: _____                                                                                 |
| _____                                                                                                                  |
| Technique: _____                                                                                                       |
| Description of the complication: _____                                                                                 |
| _____                                                                                                                  |
| _____                                                                                                                  |

| Do you have any recommendations, praise or criticism? We highly appreciate your feedback! |
|-------------------------------------------------------------------------------------------|
| _____                                                                                     |
| _____                                                                                     |
| _____                                                                                     |
| _____                                                                                     |
| _____                                                                                     |

Thank you very much for your participation!

The SimulRATor-Team [kontakt@simulator.de](mailto:kontakt@simulator.de)

# Welcome to „SimulRATor“!

## We invite you to take part in our survey on simulators in laboratory animal science.

**We are a team of scientists** of the Institutes of Veterinary Anatomy, of Animal Welfare, Animal Behavior and Laboratory Animal Science and of Veterinary Epidemiology and Biometry at the Department of Veterinary Medicine of the Freie Universität Berlin and **are evaluating all currently commercially available rat and mouse simulators in laboratory animal training courses for a research project.**

**Since you as a participant can evaluate best**, how good the training on the simulator and the preparation for the practical exercises on the live animal is, we would kindly ask you for **your personal feedback on the strengths and weaknesses of the simulators** on which you have trained in the course.

**Thank you very much for your participation!**

**The SimulRATor-Team**

Further information can be found at [www.simulrator.de](http://www.simulrator.de) or write to [kontakt@simulrator.de](mailto:kontakt@simulrator.de).

### Part 2 of 2 Rat Simulator E

ID: \_\_\_\_\_

Privacy Notice: Your participation in the survey is voluntary. The survey data is anonymously stored and managed. Under no circumstances will data be passed on to third parties. We collect no personal information from you. No conclusions on your participation are possible. Only the people involved in the research project have access to the information provided by you within the questionnaire and are obliged to maintain secrecy. The information provided is used for research purposes only. You can cancel the survey at any time without giving reasons.



| 1. How well were you able to manage handling, restraint, and ear punching on the live rat? |                       |                       |                       |                       |                       |                       |                            |
|--------------------------------------------------------------------------------------------|-----------------------|-----------------------|-----------------------|-----------------------|-----------------------|-----------------------|----------------------------|
| Techniques                                                                                 | Extremely good<br>1   | Quite good<br>2       | Slightly good<br>3    | Slightly bad<br>4     | Quite bad<br>5        | Extremely bad<br>6    | Technique was not trained. |
| Handling - transfer from cage to cage                                                      | <input type="radio"/>      |
| Restraint - scruffing                                                                      | <input type="radio"/>      |
| Restraint - over the shoulder grip                                                         | <input type="radio"/>      |
| Restraint - middle shoulder grip                                                           | <input type="radio"/>      |
| Restraint – under the shoulder grip                                                        | <input type="radio"/>      |
| Ear punching                                                                               | <input type="radio"/>      |
| Other:                                                                                     | <input type="radio"/>      |
|                                                                                            | <input type="radio"/>      |

| 2. How well were you able to manage the following procedural techniques on the live rat? |                       |                       |                       |                       |                       |                       |                       |                          |
|------------------------------------------------------------------------------------------|-----------------------|-----------------------|-----------------------|-----------------------|-----------------------|-----------------------|-----------------------|--------------------------|
| Please also tick the box in the last column if the rat was anesthetized for the method.  |                       |                       |                       |                       |                       |                       |                       |                          |
| Techniques                                                                               | Extremely good<br>1   | Quite good<br>2       | Slightly good<br>3    | Slightly bad<br>4     | Quite bad<br>5        | Extremely bad<br>6    | Not trained.          | Rat in anesthesia.       |
| Feeding the rat                                                                          | <input type="radio"/> | <input type="checkbox"/> |
| Administration by oral gavage                                                            | <input type="radio"/> | <input type="checkbox"/> |
| Subcutaneous administration under skin over the neck                                     | <input type="radio"/> | <input type="checkbox"/> |
| Subcutaneous administration under skin over the flank                                    | <input type="radio"/> | <input type="checkbox"/> |
| Intramuscular administration                                                             | <input type="radio"/> | <input type="checkbox"/> |
| Intraperitoneal administration                                                           | <input type="radio"/> | <input type="checkbox"/> |
| Intravenous administration via dorsal penis vein                                         | <input type="radio"/> | <input type="checkbox"/> |
| Intravenous administration via lateral tail vein                                         | <input type="radio"/> | <input type="checkbox"/> |
| Blood sampling from sublingual vein                                                      | <input type="radio"/> | <input type="checkbox"/> |
| Blood sampling from retro-orbital plexus                                                 | <input type="radio"/> | <input type="checkbox"/> |
| Blood sampling from saphenous vein                                                       | <input type="radio"/> | <input type="checkbox"/> |
| Blood sampling from lateral tail vein                                                    | <input type="radio"/> | <input type="checkbox"/> |
| Blood sampling from heart                                                                | <input type="radio"/> | <input type="checkbox"/> |
| Other:                                                                                   | <input type="radio"/> | <input type="checkbox"/> |
|                                                                                          | <input type="radio"/> | <input type="checkbox"/> |

| 3. Which <u>3 techniques</u> on the live rat are in your opinion particularly demanding for the performer?                                |       |
|-------------------------------------------------------------------------------------------------------------------------------------------|-------|
| Please name 3 techniques from <u>1<sup>st</sup></u> and <u>2<sup>nd</sup></u> question. Please specify the techniques <u>completely</u> . |       |
| 1.                                                                                                                                        | _____ |
| 2.                                                                                                                                        | _____ |
| 3.                                                                                                                                        | _____ |

| 4. Please select from the list below <u>the 5 techniques</u> on the live rat, for which you consider a preparatory training on simulators to be particularly useful. |                                                       |
|----------------------------------------------------------------------------------------------------------------------------------------------------------------------|-------------------------------------------------------|
| <b>Max. 5 techniques can be chosen.</b>                                                                                                                              |                                                       |
| <input type="checkbox"/>                                                                                                                                             | Handling - transfer from cage to cage                 |
| <input type="checkbox"/>                                                                                                                                             | Restraint (different techniques)                      |
| <input type="checkbox"/>                                                                                                                                             | Ear punching                                          |
| <input type="checkbox"/>                                                                                                                                             | Feeding the rat                                       |
| <input type="checkbox"/>                                                                                                                                             | Administration by oral gavage                         |
| <input type="checkbox"/>                                                                                                                                             | Subcutaneous administration under skin over the neck  |
| <input type="checkbox"/>                                                                                                                                             | Subcutaneous administration under skin over the flank |
| <input type="checkbox"/>                                                                                                                                             | Intramuscular administration                          |
| <input type="checkbox"/>                                                                                                                                             | Intraperitoneal administration                        |
| <input type="checkbox"/>                                                                                                                                             | Intravenous administration via dorsal penis vein      |
| <input type="checkbox"/>                                                                                                                                             | Intravenous administration via lateral tail vein      |
| <input type="checkbox"/>                                                                                                                                             | Blood sampling from sublingual vein                   |
| <input type="checkbox"/>                                                                                                                                             | Blood sampling from retro-orbital plexus              |
| <input type="checkbox"/>                                                                                                                                             | Blood sampling from saphenous vein                    |
| <input type="checkbox"/>                                                                                                                                             | Blood sampling from lateral tail vein                 |
| <input type="checkbox"/>                                                                                                                                             | Blood sampling from heart                             |

| 5. Would you also like to have a simulator training for <u>other</u> methods on the rat? |  |
|------------------------------------------------------------------------------------------|--|
| If so, please describe which technique(s) is/are important to you.                       |  |
| <div style="border: 1px solid black; height: 60px; width: 100%;"></div>                  |  |

## Your personal feedback about the Rat Simulator E

| 6. How realistic are the following features of the Rat Simulator E in comparison to a live rat? |                          |                       |                         |                           |                        |                            |
|-------------------------------------------------------------------------------------------------|--------------------------|-----------------------|-------------------------|---------------------------|------------------------|----------------------------|
| Features                                                                                        | Extremely realistic<br>1 | Quite realistic<br>2  | Slightly realistic<br>3 | Slightly unrealistic<br>4 | Quite unrealistic<br>5 | Extremely unrealistic<br>6 |
| General appearance                                                                              | <input type="radio"/>    | <input type="radio"/> | <input type="radio"/>   | <input type="radio"/>     | <input type="radio"/>  | <input type="radio"/>      |
| Haptics        | <input type="radio"/>    | <input type="radio"/> | <input type="radio"/>   | <input type="radio"/>     | <input type="radio"/>  | <input type="radio"/>      |
| Movability of skin over neck                                                                    | <input type="radio"/>    | <input type="radio"/> | <input type="radio"/>   | <input type="radio"/>     | <input type="radio"/>  | <input type="radio"/>      |
| Movability of skin over flank                                                                   | <input type="radio"/>    | <input type="radio"/> | <input type="radio"/>   | <input type="radio"/>     | <input type="radio"/>  | <input type="radio"/>      |
| Consistency of skin surface                                                                     | <input type="radio"/>    | <input type="radio"/> | <input type="radio"/>   | <input type="radio"/>     | <input type="radio"/>  | <input type="radio"/>      |
| Body height                                                                                     | <input type="radio"/>    | <input type="radio"/> | <input type="radio"/>   | <input type="radio"/>     | <input type="radio"/>  | <input type="radio"/>      |
| Body weight                                                                                     | <input type="radio"/>    | <input type="radio"/> | <input type="radio"/>   | <input type="radio"/>     | <input type="radio"/>  | <input type="radio"/>      |
| Body shape                                                                                      | <input type="radio"/>    | <input type="radio"/> | <input type="radio"/>   | <input type="radio"/>     | <input type="radio"/>  | <input type="radio"/>      |
| Proportions                                                                                     | <input type="radio"/>    | <input type="radio"/> | <input type="radio"/>   | <input type="radio"/>     | <input type="radio"/>  | <input type="radio"/>      |

| 7. How realistic was the training with the Rat Simulator E in comparison to a live rat for you? |                          |                       |                         |                           |                        |                            |                            |
|-------------------------------------------------------------------------------------------------|--------------------------|-----------------------|-------------------------|---------------------------|------------------------|----------------------------|----------------------------|
| Techniques                                                                                      | Extremely realistic<br>1 | Quite realistic<br>2  | Slightly realistic<br>3 | Slightly unrealistic<br>4 | Quite unrealistic<br>5 | Extremely unrealistic<br>6 | Technique was not trained. |
| Handling - transfer from cage to cage                                                           | <input type="radio"/>    | <input type="radio"/> | <input type="radio"/>   | <input type="radio"/>     | <input type="radio"/>  | <input type="radio"/>      | <input type="radio"/>      |
| Restraint - scruffing                                                                           | <input type="radio"/>    | <input type="radio"/> | <input type="radio"/>   | <input type="radio"/>     | <input type="radio"/>  | <input type="radio"/>      | <input type="radio"/>      |
| Restraint - over the shoulder grip                                                              | <input type="radio"/>    | <input type="radio"/> | <input type="radio"/>   | <input type="radio"/>     | <input type="radio"/>  | <input type="radio"/>      | <input type="radio"/>      |
| Restraint - middle shoulder grip                                                                | <input type="radio"/>    | <input type="radio"/> | <input type="radio"/>   | <input type="radio"/>     | <input type="radio"/>  | <input type="radio"/>      | <input type="radio"/>      |
| Restraint - under the shoulder grip                                                             | <input type="radio"/>    | <input type="radio"/> | <input type="radio"/>   | <input type="radio"/>     | <input type="radio"/>  | <input type="radio"/>      | <input type="radio"/>      |
| Administration by oral gavage                                                                   | <input type="radio"/>    | <input type="radio"/> | <input type="radio"/>   | <input type="radio"/>     | <input type="radio"/>  | <input type="radio"/>      | <input type="radio"/>      |
| Subcutaneous administration under skin over the neck                                            | <input type="radio"/>    | <input type="radio"/> | <input type="radio"/>   | <input type="radio"/>     | <input type="radio"/>  | <input type="radio"/>      | <input type="radio"/>      |
| Subcutaneous administration under skin over the flank                                           | <input type="radio"/>    | <input type="radio"/> | <input type="radio"/>   | <input type="radio"/>     | <input type="radio"/>  | <input type="radio"/>      | <input type="radio"/>      |
| Intramuscular administration                                                                    | <input type="radio"/>    | <input type="radio"/> | <input type="radio"/>   | <input type="radio"/>     | <input type="radio"/>  | <input type="radio"/>      | <input type="radio"/>      |
| Intravenous administration via lateral tail vein                                                | <input type="radio"/>    | <input type="radio"/> | <input type="radio"/>   | <input type="radio"/>     | <input type="radio"/>  | <input type="radio"/>      | <input type="radio"/>      |
| Blood sampling from lateral tail vein                                                           | <input type="radio"/>    | <input type="radio"/> | <input type="radio"/>   | <input type="radio"/>     | <input type="radio"/>  | <input type="radio"/>      | <input type="radio"/>      |
| Other:                                                                                          | <input type="radio"/>    | <input type="radio"/> | <input type="radio"/>   | <input type="radio"/>     | <input type="radio"/>  | <input type="radio"/>      | <input type="radio"/>      |
|                                                                                                 | <input type="radio"/>    | <input type="radio"/> | <input type="radio"/>   | <input type="radio"/>     | <input type="radio"/>  | <input type="radio"/>      | <input type="radio"/>      |

| 8. How well do the following statements about the training with the Rat Simulator E apply? |                         |                       |                       |                              |                             |                            |
|--------------------------------------------------------------------------------------------|-------------------------|-----------------------|-----------------------|------------------------------|-----------------------------|----------------------------|
|                                                                                            | Completely applies<br>1 | Largely applies<br>2  | Slightly applies<br>3 | Slightly does not apply<br>4 | Largely does not apply<br>5 | Does not apply at all<br>6 |
| I felt more secure in performing <b>handling and restraint</b> on the live rat.            | <input type="radio"/>   | <input type="radio"/> | <input type="radio"/> | <input type="radio"/>        | <input type="radio"/>       | <input type="radio"/>      |
| I felt more secure in performing <b>procedural techniques</b> on the live rat.             | <input type="radio"/>   | <input type="radio"/> | <input type="radio"/> | <input type="radio"/>        | <input type="radio"/>       | <input type="radio"/>      |

**9. How well did the Rat Simulator E prepare you for the entire course training on the live rat?**

|                |            |               |              |           |               |
|----------------|------------|---------------|--------------|-----------|---------------|
| Extremely good | Quite good | Slightly good | Slightly bad | Quite bad | Extremely bad |
| 1              | 2          | 3             | 4            | 5         | 6             |
| ○              | ○          | ○             | ○            | ○         | ○             |

10. How well did the Rat Simulator E prepare you for the following techniques in the course training on the live rat?

[illegible]

**11. What did you particularly like about the Rat Simulator E?**

|  |
|--|
|  |
|--|

**12. What did you not like about the Rat Simulator E?**

|  |
|--|
|  |
|--|

**13. What would you like to improve about the Rat Simulator E?**

|  |
|--|
|  |
|--|

14. Which species are you expecting to work with for scientific reasons in the next 6 months after you have passed the course?

Multiple answers for species are possible.

- |                                     |                                |                                          |
|-------------------------------------|--------------------------------|------------------------------------------|
| <input type="checkbox"/> Rat        | <input type="checkbox"/> Pig   | <input type="checkbox"/> Dog             |
| <input type="checkbox"/> Mouse      | <input type="checkbox"/> Sheep | <input type="checkbox"/> Cat             |
| <input type="checkbox"/> Rabbit     | <input type="checkbox"/> Goat  | <input type="checkbox"/> Other _____     |
| <input type="checkbox"/> Guinea pig | <input type="checkbox"/> Cow   | <input type="checkbox"/> None            |
| <input type="checkbox"/> Hamster    | <input type="checkbox"/> Horse | <input type="checkbox"/> I cannot judge. |

15. How old are you?

\_\_\_\_\_ years

**16. What is your gender?**

- ☐ Male
- ☐ Female
- ☐ Other
- ☐ No answer

**17. Please mark your highest educational degree you have achieved.**

Only one answer is possible.

- ☐ (Still) no qualification (yet)
- ☐ Apprenticeship/Vocational training
- ☐ Technical college qualification
- ☐ University of Applied Sciences Degree
- ☐ Bachelor's Degree
- ☐ Master's Degree, diploma or state examination
- ☐ Ph.D. /Doctoral degree
- ☐ Other: \_\_\_\_\_

**18. Please complete the sentence below.**

Only one answer is possible.

**I am participating in the course as ...**

- ☐ ...an academic employee.
- ☐ ...a technical assistant.
- ☐ ...an apprentice.
- ☐ ...a student.
- ☐ ...other: \_\_\_\_\_.

**19. What is your discipline?**

Only one answer is possible.

- ☐ Human Medicine
- ☐ Veterinary Medicine
- ☐ Dental Medicine
- ☐ Pharmacology
- ☐ Biology
- ☐ Chemistry
- ☐ Physics
- ☐ Biotechnology
- ☐ Nutritional Science
- ☐ Other: \_\_\_\_\_

Please turn over.

**20. Had you already had experience ...**

Only one answer is possible.

**...in handling rats before the course?**

- ☐ Yes, a lot of.
- ☐ Yes, a little bit.
- ☐ No, not at all.

**21. Had you already had experience ...**

Only one answer is possible.

**...in handling mice before the course?**

- ☐ Yes, a lot of.
- ☐ Yes, a little bit.
- ☐ No, not at all.

**22. Had you already worked with other simulator(s) before the course?**

Multiple answers for simulators are possible. Please describe the model in brief.

- ☐ Yes, ...
  - ☐ ...with rat simulators: Model: \_\_\_\_\_
  - ☐ ...with mouse simulators: Model: \_\_\_\_\_
  - ☐ ...with other simulators: Model: \_\_\_\_\_
- ☐ No.

**Do you have any recommendations, praise or criticism? We highly appreciate your feedback!**

**Thank you very much for your participation!**

**The SimulRATor-Team**

**[web: www.simulator.de](http://www.simulator.de) mail: [kontakt@simulator.de](mailto:kontakt@simulator.de)**

# Herzlich willkommen bei „SimulRATor“

## Wir laden Sie ein, an unserer Umfrage über versuchstierkundliche Simulatoren teilzunehmen.

Wir sind ein Team aus Wissenschaftler/innen der Institute für Veterinär-Anatomie, für Tierschutz, Tierverhalten und Versuchstierkunde und für Veterinär-Epidemiologie und Biometrie am Fachbereich Veterinärmedizin der Freien Universität Berlin und **evaluieren in einem Forschungsprojekt alle derzeit kommerziell erhältlichen Ratten- und Maussimulatoren** in versuchstierkundlichen Kursen.

Da Sie als Kursteilnehmer/in am besten bewerten können, wie gut man an einem Simulator trainieren und sich auf die praktischen Übungen am Tier im Kurs vorbereiten kann, bitten wir Sie um Ihr **persönliches Feedback über die Stärken und Schwächen der Simulatoren** mit denen Sie im Kurs trainiert haben.

**Danke für Ihre Unterstützung!**

### **Das SimulRATor-Team**

Weitere Informationen finden Sie auf [www.simulrator.de](http://www.simulrator.de) oder schreiben Sie uns auf [kontakt@simulrator.de](mailto:kontakt@simulrator.de).

### Teil 1 von 2 Rat Simulator A

ID: \_\_\_\_\_

➔ **Bitte merken Sie sich Ihre ID für Teil 2.**  
**Danke!**

Hinweis zum Datenschutz: Ihre Teilnahme an der Umfrage ist freiwillig. Die Umfragedaten werden anonymisiert gespeichert und verwaltet. Keinesfalls werden Daten an Dritte weitergegeben. Wir erheben keine personenbezogenen Daten von Ihnen. Es sind keine Rückschlüsse auf Ihre Teilnahme möglich. Nur Projektbeteiligte haben Zugriff auf die von Ihnen innerhalb des Fragebogens gemachten Angaben und sind zur Verschwiegenheit verpflichtet. Die gemachten Angaben werden ausschließlich für Forschungszwecke genutzt. Sie können die Umfrage jederzeit ohne Angabe von Gründen abbrechen.

| 1. Wie gut gelangen Ihnen die versuchstierkundlichen Methoden an der Rat Simulator A? |                       |                           |                       |                       |                       |                       |                                |
|---------------------------------------------------------------------------------------|-----------------------|---------------------------|-----------------------|-----------------------|-----------------------|-----------------------|--------------------------------|
|                                                                                       | Sehr<br>schlecht<br>1 | Ziemlich<br>schlecht<br>2 | Eher<br>schlecht<br>3 | Eher<br>gut<br>4      | Ziemlich<br>gut<br>5  | Sehr<br>gut<br>6      | Methode<br>nicht<br>trainiert. |
| Versuchstierkundliche Methoden                                                        |                       |                           |                       |                       |                       |                       |                                |
| Handling - Transfer von Käfig zu Käfig                                                | <input type="radio"/> | <input type="radio"/>     | <input type="radio"/> | <input type="radio"/> | <input type="radio"/> | <input type="radio"/> | <input type="radio"/>          |
| Fixieren mit Nackengriff                                                              | <input type="radio"/> | <input type="radio"/>     | <input type="radio"/> | <input type="radio"/> | <input type="radio"/> | <input type="radio"/> | <input type="radio"/>          |
| Fixieren mit oberem Schultergriff                                                     | <input type="radio"/> | <input type="radio"/>     | <input type="radio"/> | <input type="radio"/> | <input type="radio"/> | <input type="radio"/> | <input type="radio"/>          |
| Fixieren mit mittlerem Schultergriff                                                  | <input type="radio"/> | <input type="radio"/>     | <input type="radio"/> | <input type="radio"/> | <input type="radio"/> | <input type="radio"/> | <input type="radio"/>          |
| Fixieren mit unterem Schultergriff                                                    | <input type="radio"/> | <input type="radio"/>     | <input type="radio"/> | <input type="radio"/> | <input type="radio"/> | <input type="radio"/> | <input type="radio"/>          |
| Applikation per os mit Sonde                                                          | <input type="radio"/> | <input type="radio"/>     | <input type="radio"/> | <input type="radio"/> | <input type="radio"/> | <input type="radio"/> | <input type="radio"/>          |
| Applikation intravenös in die laterale Schwanzvene                                    | <input type="radio"/> | <input type="radio"/>     | <input type="radio"/> | <input type="radio"/> | <input type="radio"/> | <input type="radio"/> | <input type="radio"/>          |
| Blutentnahme aus der lateralen Schwanzvene                                            | <input type="radio"/> | <input type="radio"/>     | <input type="radio"/> | <input type="radio"/> | <input type="radio"/> | <input type="radio"/> | <input type="radio"/>          |
| Sonstiges:                                                                            | <input type="radio"/> | <input type="radio"/>     | <input type="radio"/> | <input type="radio"/> | <input type="radio"/> | <input type="radio"/> | <input type="radio"/>          |
|                                                                                       | <input type="radio"/> | <input type="radio"/>     | <input type="radio"/> | <input type="radio"/> | <input type="radio"/> | <input type="radio"/> | <input type="radio"/>          |

| 2. Wie gut treffen folgenden Aussagen über das Training an der Rat Simulator A zu?                                      |                                 |                              |                        |                                 |                                       |                                         |
|-------------------------------------------------------------------------------------------------------------------------|---------------------------------|------------------------------|------------------------|---------------------------------|---------------------------------------|-----------------------------------------|
|                                                                                                                         | Trifft<br>voll und ganz zu<br>1 | Trifft<br>weitgehend zu<br>2 | Trifft<br>eher zu<br>3 | Trifft<br>eher<br>nicht zu<br>4 | Trifft<br>weitgehend<br>nicht zu<br>5 | Trifft<br>ganz und gar<br>nicht zu<br>6 |
| Die Anzahl an Teilnehmer/innen pro Rat Simulator A war angemessen.                                                      | <input type="radio"/>           | <input type="radio"/>        | <input type="radio"/>  | <input type="radio"/>           | <input type="radio"/>                 | <input type="radio"/>                   |
| Die Trainingsdauer an der Rat Simulator A war ausreichend.                                                              | <input type="radio"/>           | <input type="radio"/>        | <input type="radio"/>  | <input type="radio"/>           | <input type="radio"/>                 | <input type="radio"/>                   |
| Die Methoden lassen sich an der Rat Simulator A zufriedenstellend trainieren.                                           | <input type="radio"/>           | <input type="radio"/>        | <input type="radio"/>  | <input type="radio"/>           | <input type="radio"/>                 | <input type="radio"/>                   |
| Durch das Training an der Rat Simulator A fühle ich mich für das Kurstraining an der lebenden Ratte besser vorbereitet. | <input type="radio"/>           | <input type="radio"/>        | <input type="radio"/>  | <input type="radio"/>           | <input type="radio"/>                 | <input type="radio"/>                   |

| 3. Falls es zu materialbedingten Schwierigkeiten bei der Verwendung der Rat Simulator A kam, bitte nennen Sie uns diese. |       |
|--------------------------------------------------------------------------------------------------------------------------|-------|
| Versuchstierkundliche Methode:                                                                                           | _____ |
| Beschreibung der Komplikation:                                                                                           | _____ |
|                                                                                                                          | _____ |
|                                                                                                                          | _____ |
| Versuchstierkundliche Methode:                                                                                           | _____ |
| Beschreibung der Komplikation:                                                                                           | _____ |
|                                                                                                                          | _____ |
|                                                                                                                          | _____ |

| Haben Sie weitere Anmerkungen, Lob oder Kritik? Wir freuen uns über Ihr Feedback! |
|-----------------------------------------------------------------------------------|
|                                                                                   |

Herzlichen Dank für Ihre Teilnahme!

Das SimulRATor-Team [kontakt@simulrator.de](mailto:kontakt@simulrator.de)

# Herzlich willkommen bei „SimulRATor“

## Wir laden Sie ein, an unserer Umfrage über versuchstierkundliche Simulatoren teilzunehmen.

**Wir sind ein Team aus Wissenschaftler/innen** der Institute für Veterinär-Anatomie, für Tierschutz, Tierverhalten und Versuchstierkunde und für Veterinär-Epidemiologie und Biometrie am Fachbereich Veterinärmedizin der Freien Universität Berlin **und evaluieren in einem Forschungsprojekt alle derzeit kommerziell erhältlichen Ratten- und Maussimulatoren** in versuchstierkundlichen Kursen.

**Da Sie als Kursteilnehmer/in am besten bewerten können**, wie gut man an einem Simulator trainieren und sich auf die praktischen Übungen am Tier im Kurs vorbereiten kann, bitten wir Sie um **Ihr persönliches Feedback über die Stärken und Schwächen der Simulatoren** mit denen Sie im Kurs trainiert haben.

**Danke für Ihre Unterstützung!**

**Das SimulRATor-Team**

Weitere Informationen finden Sie auf [www.simulrator.de](http://www.simulrator.de) oder schreiben Sie uns auf [kontakt@simulrator.de](mailto:kontakt@simulrator.de).

### Teil 2 von 2 Rat Simulator A

ID: \_\_\_\_\_

Hinweis zum Datenschutz: Ihre Teilnahme an der Umfrage ist freiwillig. Die Umfragedaten werden anonymisiert gespeichert und verwaltet. Keinesfalls werden Daten an Dritte weitergegeben. Wir erheben keine personenbezogenen Daten von Ihnen. Es sind keine Rückschlüsse auf Ihre Teilnahme möglich. Nur Projektbeteiligte haben Zugriff auf die von Ihnen innerhalb des Fragebogens gemachten Angaben und sind zur Verschwiegenheit verpflichtet. Die gemachten Angaben werden ausschließlich für Forschungszwecke genutzt. Sie können die Umfrage jederzeit ohne Angabe von Gründen abbrechen.

| 1. Wie gut gelangen Ihnen Handling, Fixieren und Markieren an der lebenden Ratte? |                       |                       |                       |                       |                        |                       |                          |
|-----------------------------------------------------------------------------------|-----------------------|-----------------------|-----------------------|-----------------------|------------------------|-----------------------|--------------------------|
|                                                                                   | Sehr gut<br>1         | Ziemlich gut<br>2     | Eher gut<br>3         | Eher schlecht<br>4    | Ziemlich schlecht<br>5 | Sehr schlecht<br>6    | Methode nicht trainiert. |
| <b>Versuchstierkundliche Methoden</b>                                             |                       |                       |                       |                       |                        |                       |                          |
| Handling - Transfer von Käfig zu Käfig                                            | <input type="radio"/>  | <input type="radio"/> | <input type="radio"/>    |
| Fixieren mit Nackengriff                                                          | <input type="radio"/>  | <input type="radio"/> | <input type="radio"/>    |
| Fixieren mit oberem Schultergriff                                                 | <input type="radio"/>  | <input type="radio"/> | <input type="radio"/>    |
| Fixieren mit mittlerem Schultergriff                                              | <input type="radio"/>  | <input type="radio"/> | <input type="radio"/>    |
| Fixieren mit unterem Schultergriff                                                | <input type="radio"/>  | <input type="radio"/> | <input type="radio"/>    |
| Ohrlochmarkierung                                                                 | <input type="radio"/>  | <input type="radio"/> | <input type="radio"/>    |
| Sonstiges:                                                                        | <input type="radio"/>  | <input type="radio"/> | <input type="radio"/>    |
|                                                                                   | <input type="radio"/>  | <input type="radio"/> | <input type="radio"/>    |

| 2. Wie gut gelangen Ihnen die folgenden versuchstierkundlichen Methoden an der lebenden Ratte?                    |                       |                       |                       |                       |                        |                       |                       |                          |
|-------------------------------------------------------------------------------------------------------------------|-----------------------|-----------------------|-----------------------|-----------------------|------------------------|-----------------------|-----------------------|--------------------------|
| Bitte kreuzen Sie zusätzlich das Kästchen der letzten Spalte an, wenn die Ratte für die Methode narkotisiert war. |                       |                       |                       |                       |                        |                       |                       |                          |
|                                                                                                                   | Sehr gut<br>1         | Ziemlich gut<br>2     | Eher gut<br>3         | Eher schlecht<br>4    | Ziemlich schlecht<br>5 | Sehr schlecht<br>6    | Nicht trainiert.      | Ratte in Narkose.        |
| <b>Versuchstierkundliche Methoden</b>                                                                             |                       |                       |                       |                       |                        |                       |                       |                          |
| Applikation per os ohne Sonde                                                                                     | <input type="radio"/>  | <input type="radio"/> | <input type="radio"/> | <input type="checkbox"/> |
| Applikation per os mit Sonde                                                                                      | <input type="radio"/>  | <input type="radio"/> | <input type="radio"/> | <input type="checkbox"/> |
| Applikation subkutan Nackenhautfalte                                                                              | <input type="radio"/>  | <input type="radio"/> | <input type="radio"/> | <input type="checkbox"/> |
| Applikation subkutan seitliche Bauchhautfalte (Flanke)                                                            | <input type="radio"/>  | <input type="radio"/> | <input type="radio"/> | <input type="checkbox"/> |
| Applikation intramuskulär                                                                                         | <input type="radio"/>  | <input type="radio"/> | <input type="radio"/> | <input type="checkbox"/> |
| Applikation intraperitoneal                                                                                       | <input type="radio"/>  | <input type="radio"/> | <input type="radio"/> | <input type="checkbox"/> |
| Applikation intravenös in die dorsale Penisvene                                                                   | <input type="radio"/>  | <input type="radio"/> | <input type="radio"/> | <input type="checkbox"/> |
| Applikation intravenös in die laterale Schwanzvene                                                                | <input type="radio"/>  | <input type="radio"/> | <input type="radio"/> | <input type="checkbox"/> |
| Blutentnahme aus der Vena sublingualis                                                                            | <input type="radio"/>  | <input type="radio"/> | <input type="radio"/> | <input type="checkbox"/> |
| Blutentnahme aus retrobulbärem Venenplexus                                                                        | <input type="radio"/>  | <input type="radio"/> | <input type="radio"/> | <input type="checkbox"/> |
| Blutentnahme aus der Vena saphena                                                                                 | <input type="radio"/>  | <input type="radio"/> | <input type="radio"/> | <input type="checkbox"/> |
| Blutentnahme aus der lateralen Schwanzvene                                                                        | <input type="radio"/>  | <input type="radio"/> | <input type="radio"/> | <input type="checkbox"/> |
| Blutentnahme kardial                                                                                              | <input type="radio"/>  | <input type="radio"/> | <input type="radio"/> | <input type="checkbox"/> |
| Sonstiges:                                                                                                        | <input type="radio"/>  | <input type="radio"/> | <input type="radio"/> | <input type="checkbox"/> |
|                                                                                                                   | <input type="radio"/>  | <input type="radio"/> | <input type="radio"/> | <input type="checkbox"/> |

| 3. Welche 3 Methoden an der lebenden Ratte sind Ihrer Meinung nach besonders anspruchsvoll für die/den Durchzuführende(n)? |       |
|----------------------------------------------------------------------------------------------------------------------------|-------|
| Bitte nennen Sie 3 Methoden aus der 1. und 2. Frage. Bitte geben Sie diese vollständig an.                                 |       |
| 1.                                                                                                                         | _____ |
| 2.                                                                                                                         | _____ |
| 3.                                                                                                                         | _____ |

| 4. Bitte wählen Sie aus der unten stehenden Liste die 5 Methoden an der lebenden Ratte, für die Sie ein vorbereitendes Training an Simulatoren für besonders sinnvoll einschätzen. |                                                        |
|------------------------------------------------------------------------------------------------------------------------------------------------------------------------------------|--------------------------------------------------------|
| Sie können bis zu 5 Methoden auswählen.                                                                                                                                            |                                                        |
| <input type="checkbox"/>                                                                                                                                                           | Handling - Transfer von Käfig zu Käfig                 |
| <input type="checkbox"/>                                                                                                                                                           | Fixieren (mit verschiedenen Griffen)                   |
| <input type="checkbox"/>                                                                                                                                                           | Ohrlochmarkierung                                      |
| <input type="checkbox"/>                                                                                                                                                           | Applikation per os ohne Sonde                          |
| <input type="checkbox"/>                                                                                                                                                           | Applikation per os mit Sonde                           |
| <input type="checkbox"/>                                                                                                                                                           | Applikation subkutan Nackenhautfalte                   |
| <input type="checkbox"/>                                                                                                                                                           | Applikation subkutan seitliche Bauchhautfalte (Flanke) |
| <input type="checkbox"/>                                                                                                                                                           | Applikation intramuskulär                              |
| <input type="checkbox"/>                                                                                                                                                           | Applikation intraperitoneal                            |
| <input type="checkbox"/>                                                                                                                                                           | Applikation intravenös in die dorsale Penisvene        |
| <input type="checkbox"/>                                                                                                                                                           | Applikation intravenös in die laterale Schwanzvene     |
| <input type="checkbox"/>                                                                                                                                                           | Blutentnahme aus der Vena sublingualis                 |
| <input type="checkbox"/>                                                                                                                                                           | Blutentnahme aus retrobulbärem Venenplexus             |
| <input type="checkbox"/>                                                                                                                                                           | Blutentnahme aus der Vena saphena                      |
| <input type="checkbox"/>                                                                                                                                                           | Blutentnahme aus der lateralen Schwanzvene             |
| <input type="checkbox"/>                                                                                                                                                           | Blutentnahme kardial                                   |

| 5. Würden Sie sich ein Simulator-Training auch für andere Methoden an der Ratte wünschen? |  |
|-------------------------------------------------------------------------------------------|--|
| Falls ja, beschreiben Sie uns bitte, welche Methode(n) Ihnen wichtig wäre(n).             |  |
| <div style="border: 1px solid black; height: 60px; width: 100%;"></div>                   |  |



## Ihr persönliches Feedback zur Rat Simulator A

### 6. Wie realitätsnah sind folgende Merkmale an der Rat Simulator A im Vergleich zu einer echten Ratte?

| Merkmale                                                                                 | Sehr<br>realistisch<br>1 | Ziemlich<br>realistisch<br>2 | Eher<br>realistisch<br>3 | Eher<br>unrealistisch<br>4 | Ziemlich<br>unrealistisch<br>5 | Sehr<br>unrealistisch<br>6 |
|------------------------------------------------------------------------------------------|--------------------------|------------------------------|--------------------------|----------------------------|--------------------------------|----------------------------|
| Gesamterscheinung                                                                        | <input type="radio"/>    | <input type="radio"/>        | <input type="radio"/>    | <input type="radio"/>      | <input type="radio"/>          | <input type="radio"/>      |
| Haptik  | <input type="radio"/>    | <input type="radio"/>        | <input type="radio"/>    | <input type="radio"/>      | <input type="radio"/>          | <input type="radio"/>      |
| Verschieblichkeit der Haut im Nacken                                                     | <input type="radio"/>    | <input type="radio"/>        | <input type="radio"/>    | <input type="radio"/>      | <input type="radio"/>          | <input type="radio"/>      |
| Verschieblichkeit der Haut an der seitlichen Bauchwand (Flanke)                          | <input type="radio"/>    | <input type="radio"/>        | <input type="radio"/>    | <input type="radio"/>      | <input type="radio"/>          | <input type="radio"/>      |
| Konsistenz der Hautoberfläche                                                            | <input type="radio"/>    | <input type="radio"/>        | <input type="radio"/>    | <input type="radio"/>      | <input type="radio"/>          | <input type="radio"/>      |
| Körpergröße                                                                              | <input type="radio"/>    | <input type="radio"/>        | <input type="radio"/>    | <input type="radio"/>      | <input type="radio"/>          | <input type="radio"/>      |
| Gewicht                                                                                  | <input type="radio"/>    | <input type="radio"/>        | <input type="radio"/>    | <input type="radio"/>      | <input type="radio"/>          | <input type="radio"/>      |
| Körperform                                                                               | <input type="radio"/>    | <input type="radio"/>        | <input type="radio"/>    | <input type="radio"/>      | <input type="radio"/>          | <input type="radio"/>      |
| Proportionen                                                                             | <input type="radio"/>    | <input type="radio"/>        | <input type="radio"/>    | <input type="radio"/>      | <input type="radio"/>          | <input type="radio"/>      |

### 7. Wie realitätsnah war für Sie das Training an der Rat Simulator A im Vergleich zu einer echten Ratte?

| Versuchstierkundliche Methoden                     | Sehr<br>realistisch<br>1 | Ziemlich<br>realistisch<br>2 | Eher<br>realistisch<br>3 | Eher<br>unrealistisch<br>4 | Ziemlich<br>unrealistisch<br>5 | Sehr<br>unrealistisch<br>6 | Methode<br>nicht trainiert. |
|----------------------------------------------------|--------------------------|------------------------------|--------------------------|----------------------------|--------------------------------|----------------------------|-----------------------------|
| Handling - Transfer von Käfig zu Käfig             | <input type="radio"/>    | <input type="radio"/>        | <input type="radio"/>    | <input type="radio"/>      | <input type="radio"/>          | <input type="radio"/>      | <input type="radio"/>       |
| Fixieren mit Nackengriff                           | <input type="radio"/>    | <input type="radio"/>        | <input type="radio"/>    | <input type="radio"/>      | <input type="radio"/>          | <input type="radio"/>      | <input type="radio"/>       |
| Fixieren mit oberem Schultergriff                  | <input type="radio"/>    | <input type="radio"/>        | <input type="radio"/>    | <input type="radio"/>      | <input type="radio"/>          | <input type="radio"/>      | <input type="radio"/>       |
| Fixieren mit mittlerem Schultergriff               | <input type="radio"/>    | <input type="radio"/>        | <input type="radio"/>    | <input type="radio"/>      | <input type="radio"/>          | <input type="radio"/>      | <input type="radio"/>       |
| Fixieren mit unterem Schultergriff                 | <input type="radio"/>    | <input type="radio"/>        | <input type="radio"/>    | <input type="radio"/>      | <input type="radio"/>          | <input type="radio"/>      | <input type="radio"/>       |
| Applikation per os mit Sonde                       | <input type="radio"/>    | <input type="radio"/>        | <input type="radio"/>    | <input type="radio"/>      | <input type="radio"/>          | <input type="radio"/>      | <input type="radio"/>       |
| Applikation intravenös in die laterale Schwanzvene | <input type="radio"/>    | <input type="radio"/>        | <input type="radio"/>    | <input type="radio"/>      | <input type="radio"/>          | <input type="radio"/>      | <input type="radio"/>       |
| Blutentnahme aus der lateralen Schwanzvene         | <input type="radio"/>    | <input type="radio"/>        | <input type="radio"/>    | <input type="radio"/>      | <input type="radio"/>          | <input type="radio"/>      | <input type="radio"/>       |
| Sonstiges:                                         | <input type="radio"/>    | <input type="radio"/>        | <input type="radio"/>    | <input type="radio"/>      | <input type="radio"/>          | <input type="radio"/>      | <input type="radio"/>       |
|                                                    | <input type="radio"/>    | <input type="radio"/>        | <input type="radio"/>    | <input type="radio"/>      | <input type="radio"/>          | <input type="radio"/>      | <input type="radio"/>       |

### 8. Wie gut treffen folgende Aussagen über das Training an der Rat Simulator A zu?

|                                                                                                      | Trifft<br>voll und ganz zu<br>1 | Trifft<br>weitgehend zu<br>2 | Trifft<br>eher zu<br>3 | Trifft<br>eher nicht zu<br>4 | Trifft<br>weitgehend<br>nicht zu<br>5 | Trifft ganz und<br>gar nicht zu<br>6 |
|------------------------------------------------------------------------------------------------------|---------------------------------|------------------------------|------------------------|------------------------------|---------------------------------------|--------------------------------------|
| Ich habe mich beim <b>Handling und Fixieren</b> an der lebenden Ratte sicherer gefühlt.              | <input type="radio"/>           | <input type="radio"/>        | <input type="radio"/>  | <input type="radio"/>        | <input type="radio"/>                 | <input type="radio"/>                |
| Ich habe mich bei den <b>versuchstierkundlichen Methoden</b> an der lebenden Ratte sicherer gefühlt. | <input type="radio"/>           | <input type="radio"/>        | <input type="radio"/>  | <input type="radio"/>        | <input type="radio"/>                 | <input type="radio"/>                |

| 9. Wie gut hat Sie die Rat Simulator A auf das <u>gesamte</u> Kurstraining an der lebenden Ratte vorbereitet? |                       |                       |                       |                       |                       |
|---------------------------------------------------------------------------------------------------------------|-----------------------|-----------------------|-----------------------|-----------------------|-----------------------|
| Sehr gut                                                                                                      | Ziemlich gut          | Eher gut              | Eher schlecht         | Ziemlich schlecht     | Sehr schlecht         |
| 1                                                                                                             | 2                     | 3                     | 4                     | 5                     | 6                     |
| <input type="radio"/>                                                                                         | <input type="radio"/> | <input type="radio"/> | <input type="radio"/> | <input type="radio"/> | <input type="radio"/> |

| 10. Wie gut hat Sie die Rat Simulator A auf die folgenden Methoden im Kurstraining an der lebenden Ratte vorbereitet? |                       |                       |                       |                       |                        |                       |                          |
|-----------------------------------------------------------------------------------------------------------------------|-----------------------|-----------------------|-----------------------|-----------------------|------------------------|-----------------------|--------------------------|
|                                                                                                                       | Sehr gut<br>1         | Ziemlich gut<br>2     | Eher gut<br>3         | Eher schlecht<br>4    | Ziemlich schlecht<br>5 | Sehr schlecht<br>6    | Methode nicht trainiert. |
| <b>Versuchstierkundliche Methoden</b>                                                                                 |                       |                       |                       |                       |                        |                       |                          |
| Handling - Transfer von Käfig zu Käfig                                                                                | <input type="radio"/>  | <input type="radio"/> | <input type="radio"/>    |
| Fixieren mit Nackengriff                                                                                              | <input type="radio"/>  | <input type="radio"/> | <input type="radio"/>    |
| Fixieren mit oberem Schultergriff                                                                                     | <input type="radio"/>  | <input type="radio"/> | <input type="radio"/>    |
| Fixieren mit mittlerem Schultergriff                                                                                  | <input type="radio"/>  | <input type="radio"/> | <input type="radio"/>    |
| Fixieren mit unterem Schultergriff                                                                                    | <input type="radio"/>  | <input type="radio"/> | <input type="radio"/>    |
| Applikation per os mit Sonde                                                                                          | <input type="radio"/>  | <input type="radio"/> | <input type="radio"/>    |
| Applikation intravenös in die laterale Schwanzvene                                                                    | <input type="radio"/>  | <input type="radio"/> | <input type="radio"/>    |
| Blutentnahme aus der lateralen Schwanzvene                                                                            | <input type="radio"/>  | <input type="radio"/> | <input type="radio"/>    |
| Sonstiges:                                                                                                            | <input type="radio"/>  | <input type="radio"/> | <input type="radio"/>    |
|                                                                                                                       | <input type="radio"/>  | <input type="radio"/> | <input type="radio"/>    |

| 11. Was hat Ihnen an der Rat Simulator A besonders gut gefallen? |
|------------------------------------------------------------------|
| <br><br><br><br><br><br><br><br><br><br>                         |

| 12. Was hat Ihnen an der Rat Simulator A <u>nicht</u> gefallen? |
|-----------------------------------------------------------------|
| <br><br><br><br><br><br><br><br><br><br>                        |

| 13. Was würden Sie an der Rat Simulator A gerne verbessern? |
|-------------------------------------------------------------|
| <br><br><br><br><br><br><br><br><br><br>                    |

14. Mit welchen Tierarten werden Sie nach bestandem Kurs in den nächsten 6 Monaten voraussichtlich versuchstierkundlich arbeiten?  
Mehrfachantworten sind bei den Tierarten möglich.

|                                      |                                  |                                                     |
|--------------------------------------|----------------------------------|-----------------------------------------------------|
| <input type="checkbox"/> Ratte       | <input type="checkbox"/> Schwein | <input type="checkbox"/> Hund                       |
| <input type="checkbox"/> Maus        | <input type="checkbox"/> Schaf   | <input type="checkbox"/> Katze                      |
| <input type="checkbox"/> Kaninchen   | <input type="checkbox"/> Ziege   | <input type="checkbox"/> Sonstiges _____            |
| <input type="checkbox"/> Meerschwein | <input type="checkbox"/> Rind    | <input type="checkbox"/> Keine                      |
| <input type="checkbox"/> Hamster     | <input type="checkbox"/> Pferd   | <input type="checkbox"/> Kann ich nicht beurteilen. |

15. Wie alt sind Sie?  
\_\_\_\_\_ Jahre

# Herzlich willkommen bei „SimulRATor“

## Wir laden Sie ein, an unserer Umfrage über versuchstierkundliche Simulatoren teilzunehmen.

**Wir sind ein Team aus Wissenschaftler/innen** der Institute für Veterinär-Anatomie, für Tierschutz, Tierverhalten und Versuchstierkunde und für Veterinär-Epidemiologie und Biometrie am Fachbereich Veterinärmedizin der Freien Universität Berlin **und evaluieren in einem Forschungsprojekt alle derzeit kommerziell erhältlichen Ratten- und Maussimulatoren** in versuchstierkundlichen Kursen.

**Da Sie als Kursteilnehmer/in am besten bewerten können**, wie gut man an einem Simulator trainieren und sich auf die praktischen Übungen am Tier im Kurs vorbereiten kann, bitten wir Sie um **Ihr persönliches Feedback über die Stärken und Schwächen der Simulatoren** mit denen Sie im Kurs trainiert haben.

**Danke für Ihre Unterstützung!**

### **Das SimulRATor-Team**

Weitere Informationen finden Sie auf [www.simulrator.de](http://www.simulrator.de) oder schreiben Sie uns auf [kontakt@simulrator.de](mailto:kontakt@simulrator.de).

### **Teil 1 von 2 Rat Simulator B**

ID: \_\_\_\_\_

→ **Bitte merken Sie sich Ihre ID für Teil 2.**  
**Danke!**

Hinweis zum Datenschutz: Ihre Teilnahme an der Umfrage ist freiwillig. Die Umfragedaten werden anonymisiert gespeichert und verwaltet. Keinesfalls werden Daten an Dritte weitergegeben. Wir erheben keine personenbezogenen Daten von Ihnen. Es sind keine Rückschlüsse auf Ihre Teilnahme möglich. Nur Projektbeteiligte haben Zugriff auf die von Ihnen innerhalb des Fragebogens gemachten Angaben und sind zur Verschwiegenheit verpflichtet. Die gemachten Angaben werden ausschließlich für Forschungszwecke genutzt. Sie können die Umfrage jederzeit ohne Angabe von Gründen abbrechen.

| 1. Wie gut gelangen Ihnen die versuchstierkundlichen Methoden an der Rat Simulator B? |                       |                           |                       |                       |                       |                       |                                |
|---------------------------------------------------------------------------------------|-----------------------|---------------------------|-----------------------|-----------------------|-----------------------|-----------------------|--------------------------------|
|                                                                                       | Sehr<br>schlecht<br>1 | Ziemlich<br>schlecht<br>2 | Eher<br>schlecht<br>3 | Eher<br>gut<br>4      | Ziemlich<br>gut<br>5  | Sehr<br>gut<br>6      | Methode<br>nicht<br>trainiert. |
| Versuchstierkundliche Methoden                                                        |                       |                           |                       |                       |                       |                       |                                |
| Handling - Transfer von Käfig zu Käfig                                                | <input type="radio"/> | <input type="radio"/>     | <input type="radio"/> | <input type="radio"/> | <input type="radio"/> | <input type="radio"/> | <input type="radio"/>          |
| Fixieren mit Nackengriff                                                              | <input type="radio"/> | <input type="radio"/>     | <input type="radio"/> | <input type="radio"/> | <input type="radio"/> | <input type="radio"/> | <input type="radio"/>          |
| Fixieren mit oberem Schultergriff                                                     | <input type="radio"/> | <input type="radio"/>     | <input type="radio"/> | <input type="radio"/> | <input type="radio"/> | <input type="radio"/> | <input type="radio"/>          |
| Fixieren mit mittlerem Schultergriff                                                  | <input type="radio"/> | <input type="radio"/>     | <input type="radio"/> | <input type="radio"/> | <input type="radio"/> | <input type="radio"/> | <input type="radio"/>          |
| Fixieren mit unterem Schultergriff                                                    | <input type="radio"/> | <input type="radio"/>     | <input type="radio"/> | <input type="radio"/> | <input type="radio"/> | <input type="radio"/> | <input type="radio"/>          |
| Applikation per os mit Sonde                                                          | <input type="radio"/> | <input type="radio"/>     | <input type="radio"/> | <input type="radio"/> | <input type="radio"/> | <input type="radio"/> | <input type="radio"/>          |
| Applikation intravenös in die laterale Schwanzvene                                    | <input type="radio"/> | <input type="radio"/>     | <input type="radio"/> | <input type="radio"/> | <input type="radio"/> | <input type="radio"/> | <input type="radio"/>          |
| Blutentnahme aus der lateralen Schwanzvene                                            | <input type="radio"/> | <input type="radio"/>     | <input type="radio"/> | <input type="radio"/> | <input type="radio"/> | <input type="radio"/> | <input type="radio"/>          |
| Sonstiges:                                                                            | <input type="radio"/> | <input type="radio"/>     | <input type="radio"/> | <input type="radio"/> | <input type="radio"/> | <input type="radio"/> | <input type="radio"/>          |
|                                                                                       | <input type="radio"/> | <input type="radio"/>     | <input type="radio"/> | <input type="radio"/> | <input type="radio"/> | <input type="radio"/> | <input type="radio"/>          |

| 2. Wie gut treffen folgenden Aussagen über das Training an der Rat Simulator B zu?                                      |                                 |                              |                        |                                 |                                       |                                         |
|-------------------------------------------------------------------------------------------------------------------------|---------------------------------|------------------------------|------------------------|---------------------------------|---------------------------------------|-----------------------------------------|
|                                                                                                                         | Trifft<br>voll und ganz zu<br>1 | Trifft<br>weitgehend zu<br>2 | Trifft<br>eher zu<br>3 | Trifft<br>eher<br>nicht zu<br>4 | Trifft<br>weitgehend<br>nicht zu<br>5 | Trifft<br>ganz und gar<br>nicht zu<br>6 |
| Die Anzahl an Teilnehmer/innen pro Rat Simulator B war angemessen.                                                      | <input type="radio"/>           | <input type="radio"/>        | <input type="radio"/>  | <input type="radio"/>           | <input type="radio"/>                 | <input type="radio"/>                   |
| Die Trainingsdauer an der Rat Simulator B war ausreichend.                                                              | <input type="radio"/>           | <input type="radio"/>        | <input type="radio"/>  | <input type="radio"/>           | <input type="radio"/>                 | <input type="radio"/>                   |
| Die Methoden lassen sich an der Rat Simulator B zufriedenstellend trainieren.                                           | <input type="radio"/>           | <input type="radio"/>        | <input type="radio"/>  | <input type="radio"/>           | <input type="radio"/>                 | <input type="radio"/>                   |
| Durch das Training an der Rat Simulator B fühle ich mich für das Kurstraining an der lebenden Ratte besser vorbereitet. | <input type="radio"/>           | <input type="radio"/>        | <input type="radio"/>  | <input type="radio"/>           | <input type="radio"/>                 | <input type="radio"/>                   |

| 3. Falls es zu materialbedingten Schwierigkeiten bei der Verwendung der Rat Simulator B kam, bitte nennen Sie uns diese. |       |
|--------------------------------------------------------------------------------------------------------------------------|-------|
| Versuchstierkundliche Methode:                                                                                           | _____ |
| Beschreibung der Komplikation:                                                                                           | _____ |
|                                                                                                                          | _____ |
|                                                                                                                          | _____ |
| Versuchstierkundliche Methode:                                                                                           | _____ |
| Beschreibung der Komplikation:                                                                                           | _____ |
|                                                                                                                          | _____ |
|                                                                                                                          | _____ |

| Haben Sie weitere Anmerkungen, Lob oder Kritik? Wir freuen uns über Ihr Feedback! |
|-----------------------------------------------------------------------------------|
|                                                                                   |

Herzlichen Dank für Ihre Teilnahme!

Das SimulRATor-Team [kontakt@simulrator.de](mailto:kontakt@simulrator.de)

# Herzlich willkommen bei „SimulRATor“

## Wir laden Sie ein, an unserer Umfrage über versuchstierkundliche Simulatoren teilzunehmen.

**Wir sind ein Team aus Wissenschaftler/innen** der Institute für Veterinär-Anatomie, für Tierschutz, Tierverhalten und Versuchstierkunde und für Veterinär-Epidemiologie und Biometrie am Fachbereich Veterinärmedizin der Freien Universität Berlin **und evaluieren in einem Forschungsprojekt alle derzeit kommerziell erhältlichen Ratten- und Maussimulatoren** in versuchstierkundlichen Kursen.

**Da Sie als Kursteilnehmer/in am besten bewerten können**, wie gut man an einem Simulator trainieren und sich auf die praktischen Übungen am Tier im Kurs vorbereiten kann, bitten wir Sie um **Ihr persönliches Feedback über die Stärken und Schwächen der Simulatoren** mit denen Sie im Kurs trainiert haben.

**Danke für Ihre Unterstützung!**

**Das SimulRATor-Team**

Weitere Informationen finden Sie auf [www.simulator.de](http://www.simulator.de) oder schreiben Sie uns auf [kontakt@simulator.de](mailto:kontakt@simulator.de).

### Teil 2 von 2 Rat Simulator B

ID: \_\_\_\_\_

Hinweis zum Datenschutz: Ihre Teilnahme an der Umfrage ist freiwillig. Die Umfragedaten werden anonymisiert gespeichert und verwaltet. Keinesfalls werden Daten an Dritte weitergegeben. Wir erheben keine personenbezogenen Daten von Ihnen. Es sind keine Rückschlüsse auf Ihre Teilnahme möglich. Nur Projektbeteiligte haben Zugriff auf die von Ihnen innerhalb des Fragebogens gemachten Angaben und sind zur Verschwiegenheit verpflichtet. Die gemachten Angaben werden ausschließlich für Forschungszwecke genutzt. Sie können die Umfrage jederzeit ohne Angabe von Gründen abbrechen.

| 1. Wie gut gelangen Ihnen Handling, Fixieren und Markieren an der lebenden Ratte? |                       |                       |                       |                       |                       |                       |                          |
|-----------------------------------------------------------------------------------|-----------------------|-----------------------|-----------------------|-----------------------|-----------------------|-----------------------|--------------------------|
|                                                                                   | Sehr gut              | Ziemlich gut          | Eher gut              | Eher schlecht         | Ziemlich schlecht     | Sehr schlecht         | Methode nicht trainiert. |
| Versuchstierkundliche Methoden                                                    | 1                     | 2                     | 3                     | 4                     | 5                     | 6                     |                          |
| Handling - Transfer von Käfig zu Käfig                                            | <input type="radio"/>    |
| Fixieren mit Nackengriff                                                          | <input type="radio"/>    |
| Fixieren mit oberem Schultergriff                                                 | <input type="radio"/>    |
| Fixieren mit mittlerem Schultergriff                                              | <input type="radio"/>    |
| Fixieren mit unterem Schultergriff                                                | <input type="radio"/>    |
| Ohrlochmarkierung                                                                 | <input type="radio"/>    |
| Sonstiges:                                                                        | <input type="radio"/>    |
|                                                                                   | <input type="radio"/>    |

| 2. Wie gut gelangen Ihnen die folgenden versuchstierkundlichen Methoden an der lebenden Ratte?                    |                       |                       |                       |                       |                       |                       |                       |                          |
|-------------------------------------------------------------------------------------------------------------------|-----------------------|-----------------------|-----------------------|-----------------------|-----------------------|-----------------------|-----------------------|--------------------------|
| Bitte kreuzen Sie zusätzlich das Kästchen der letzten Spalte an, wenn die Ratte für die Methode narkotisiert war. |                       |                       |                       |                       |                       |                       |                       |                          |
|                                                                                                                   | Sehr gut              | Ziemlich gut          | Eher gut              | Eher schlecht         | Ziemlich schlecht     | Sehr schlecht         | Nicht trainiert.      | Ratte in Narkose.        |
| Versuchstierkundliche Methoden                                                                                    | 1                     | 2                     | 3                     | 4                     | 5                     | 6                     |                       |                          |
| Applikation per os ohne Sonde                                                                                     | <input type="radio"/> | <input type="checkbox"/> |
| Applikation per os mit Sonde                                                                                      | <input type="radio"/> | <input type="checkbox"/> |
| Applikation subkutan Nackenhautfalte                                                                              | <input type="radio"/> | <input type="checkbox"/> |
| Applikation subkutan seitliche Bauchhautfalte (Flanke)                                                            | <input type="radio"/> | <input type="checkbox"/> |
| Applikation intramuskulär                                                                                         | <input type="radio"/> | <input type="checkbox"/> |
| Applikation intraperitoneal                                                                                       | <input type="radio"/> | <input type="checkbox"/> |
| Applikation intravenös in die dorsale Penisvene                                                                   | <input type="radio"/> | <input type="checkbox"/> |
| Applikation intravenös in die laterale Schwanzvene                                                                | <input type="radio"/> | <input type="checkbox"/> |
| Blutentnahme aus der Vena sublingualis                                                                            | <input type="radio"/> | <input type="checkbox"/> |
| Blutentnahme aus retrobulbärem Venenplexus                                                                        | <input type="radio"/> | <input type="checkbox"/> |
| Blutentnahme aus der Vena saphena                                                                                 | <input type="radio"/> | <input type="checkbox"/> |
| Blutentnahme aus der lateralen Schwanzvene                                                                        | <input type="radio"/> | <input type="checkbox"/> |
| Blutentnahme kardial                                                                                              | <input type="radio"/> | <input type="checkbox"/> |
| Sonstiges:                                                                                                        | <input type="radio"/> | <input type="checkbox"/> |
|                                                                                                                   | <input type="radio"/> | <input type="checkbox"/> |

| 3. Welche 3 Methoden an der lebenden Ratte sind Ihrer Meinung nach besonders anspruchsvoll für die/den Durchzuführende(n)? |       |
|----------------------------------------------------------------------------------------------------------------------------|-------|
| Bitte nennen Sie 3 Methoden aus der 1. und 2. Frage. Bitte geben Sie diese vollständig an.                                 |       |
| 1.                                                                                                                         | _____ |
| 2.                                                                                                                         | _____ |
| 3.                                                                                                                         | _____ |

| 4. Bitte wählen Sie aus der unten stehenden Liste die 5 Methoden an der lebenden Ratte, für die Sie ein vorbereitendes Training an Simulatoren für besonders sinnvoll einschätzen. |                                                        |
|------------------------------------------------------------------------------------------------------------------------------------------------------------------------------------|--------------------------------------------------------|
| Sie können bis zu 5 Methoden auswählen.                                                                                                                                            |                                                        |
| <input type="checkbox"/>                                                                                                                                                           | Handling - Transfer von Käfig zu Käfig                 |
| <input type="checkbox"/>                                                                                                                                                           | Fixieren (mit verschiedenen Griffen)                   |
| <input type="checkbox"/>                                                                                                                                                           | Ohrlochmarkierung                                      |
| <input type="checkbox"/>                                                                                                                                                           | Applikation per os ohne Sonde                          |
| <input type="checkbox"/>                                                                                                                                                           | Applikation per os mit Sonde                           |
| <input type="checkbox"/>                                                                                                                                                           | Applikation subkutan Nackenhautfalte                   |
| <input type="checkbox"/>                                                                                                                                                           | Applikation subkutan seitliche Bauchhautfalte (Flanke) |
| <input type="checkbox"/>                                                                                                                                                           | Applikation intramuskulär                              |
| <input type="checkbox"/>                                                                                                                                                           | Applikation intraperitoneal                            |
| <input type="checkbox"/>                                                                                                                                                           | Applikation intravenös in die dorsale Penisvene        |
| <input type="checkbox"/>                                                                                                                                                           | Applikation intravenös in die laterale Schwanzvene     |
| <input type="checkbox"/>                                                                                                                                                           | Blutentnahme aus der Vena sublingualis                 |
| <input type="checkbox"/>                                                                                                                                                           | Blutentnahme aus retrobulbärem Venenplexus             |
| <input type="checkbox"/>                                                                                                                                                           | Blutentnahme aus der Vena saphena                      |
| <input type="checkbox"/>                                                                                                                                                           | Blutentnahme aus der lateralen Schwanzvene             |
| <input type="checkbox"/>                                                                                                                                                           | Blutentnahme kardial                                   |

| 5. Würden Sie sich ein Simulator-Training auch für andere Methoden an der Ratte wünschen? |  |
|-------------------------------------------------------------------------------------------|--|
| Falls ja, beschreiben Sie uns bitte, welche Methode(n) Ihnen wichtig wäre(n).             |  |
|                                                                                           |  |

## Ihr persönliches Feedback zur Rat Simulator B

### 6. Wie realitätsnah sind folgende Merkmale an der Rat Simulator B im Vergleich zu einer echten Ratte?

| Merkmale                                                                                 | Sehr<br>realistisch<br>1 | Ziemlich<br>realistisch<br>2 | Eher<br>realistisch<br>3 | Eher<br>unrealistisch<br>4 | Ziemlich<br>unrealistisch<br>5 | Sehr<br>unrealistisch<br>6 |
|------------------------------------------------------------------------------------------|--------------------------|------------------------------|--------------------------|----------------------------|--------------------------------|----------------------------|
| Gesamterscheinung                                                                        | <input type="radio"/>    | <input type="radio"/>        | <input type="radio"/>    | <input type="radio"/>      | <input type="radio"/>          | <input type="radio"/>      |
| Haptik  | <input type="radio"/>    | <input type="radio"/>        | <input type="radio"/>    | <input type="radio"/>      | <input type="radio"/>          | <input type="radio"/>      |
| Verschieblichkeit der Haut im Nacken                                                     | <input type="radio"/>    | <input type="radio"/>        | <input type="radio"/>    | <input type="radio"/>      | <input type="radio"/>          | <input type="radio"/>      |
| Verschieblichkeit der Haut an der seitlichen Bauchwand (Flanke)                          | <input type="radio"/>    | <input type="radio"/>        | <input type="radio"/>    | <input type="radio"/>      | <input type="radio"/>          | <input type="radio"/>      |
| Konsistenz der Hautoberfläche                                                            | <input type="radio"/>    | <input type="radio"/>        | <input type="radio"/>    | <input type="radio"/>      | <input type="radio"/>          | <input type="radio"/>      |
| Körpergröße                                                                              | <input type="radio"/>    | <input type="radio"/>        | <input type="radio"/>    | <input type="radio"/>      | <input type="radio"/>          | <input type="radio"/>      |
| Gewicht                                                                                  | <input type="radio"/>    | <input type="radio"/>        | <input type="radio"/>    | <input type="radio"/>      | <input type="radio"/>          | <input type="radio"/>      |
| Körperform                                                                               | <input type="radio"/>    | <input type="radio"/>        | <input type="radio"/>    | <input type="radio"/>      | <input type="radio"/>          | <input type="radio"/>      |
| Proportionen                                                                             | <input type="radio"/>    | <input type="radio"/>        | <input type="radio"/>    | <input type="radio"/>      | <input type="radio"/>          | <input type="radio"/>      |

### 7. Wie realitätsnah war für Sie das Training an der Rat Simulator B im Vergleich zu einer echten Ratte?

| Versuchstierkundliche Methoden                     | Sehr<br>realistisch<br>1 | Ziemlich<br>realistisch<br>2 | Eher<br>realistisch<br>3 | Eher<br>unrealistisch<br>4 | Ziemlich<br>unrealistisch<br>5 | Sehr<br>unrealistisch<br>6 | Methode<br>nicht trainiert. |
|----------------------------------------------------|--------------------------|------------------------------|--------------------------|----------------------------|--------------------------------|----------------------------|-----------------------------|
| Handling - Transfer von Käfig zu Käfig             | <input type="radio"/>    | <input type="radio"/>        | <input type="radio"/>    | <input type="radio"/>      | <input type="radio"/>          | <input type="radio"/>      | <input type="radio"/>       |
| Fixieren mit Nackengriff                           | <input type="radio"/>    | <input type="radio"/>        | <input type="radio"/>    | <input type="radio"/>      | <input type="radio"/>          | <input type="radio"/>      | <input type="radio"/>       |
| Fixieren mit oberem Schultergriff                  | <input type="radio"/>    | <input type="radio"/>        | <input type="radio"/>    | <input type="radio"/>      | <input type="radio"/>          | <input type="radio"/>      | <input type="radio"/>       |
| Fixieren mit mittlerem Schultergriff               | <input type="radio"/>    | <input type="radio"/>        | <input type="radio"/>    | <input type="radio"/>      | <input type="radio"/>          | <input type="radio"/>      | <input type="radio"/>       |
| Fixieren mit unterem Schultergriff                 | <input type="radio"/>    | <input type="radio"/>        | <input type="radio"/>    | <input type="radio"/>      | <input type="radio"/>          | <input type="radio"/>      | <input type="radio"/>       |
| Applikation per os mit Sonde                       | <input type="radio"/>    | <input type="radio"/>        | <input type="radio"/>    | <input type="radio"/>      | <input type="radio"/>          | <input type="radio"/>      | <input type="radio"/>       |
| Applikation intravenös in die laterale Schwanzvene | <input type="radio"/>    | <input type="radio"/>        | <input type="radio"/>    | <input type="radio"/>      | <input type="radio"/>          | <input type="radio"/>      | <input type="radio"/>       |
| Blutentnahme aus der lateralen Schwanzvene         | <input type="radio"/>    | <input type="radio"/>        | <input type="radio"/>    | <input type="radio"/>      | <input type="radio"/>          | <input type="radio"/>      | <input type="radio"/>       |
| Sonstiges:                                         | <input type="radio"/>    | <input type="radio"/>        | <input type="radio"/>    | <input type="radio"/>      | <input type="radio"/>          | <input type="radio"/>      | <input type="radio"/>       |
|                                                    | <input type="radio"/>    | <input type="radio"/>        | <input type="radio"/>    | <input type="radio"/>      | <input type="radio"/>          | <input type="radio"/>      | <input type="radio"/>       |

### 8. Wie gut treffen folgende Aussagen über das Training an der Rat Simulator B zu?

|                                                                                                      | Trifft<br>voll und ganz zu<br>1 | Trifft<br>weitgehend zu<br>2 | Trifft<br>eher zu<br>3 | Trifft<br>eher <u>nicht</u> zu<br>4 | Trifft<br>weitgehend<br><u>nicht</u> zu<br>5 | Trifft ganz und<br>gar <u>nicht</u> zu<br>6 |
|------------------------------------------------------------------------------------------------------|---------------------------------|------------------------------|------------------------|-------------------------------------|----------------------------------------------|---------------------------------------------|
| Ich habe mich beim <b>Handling und Fixieren</b> an der lebenden Ratte sicherer gefühlt.              | <input type="radio"/>           | <input type="radio"/>        | <input type="radio"/>  | <input type="radio"/>               | <input type="radio"/>                        | <input type="radio"/>                       |
| Ich habe mich bei den <b>versuchstierkundlichen Methoden</b> an der lebenden Ratte sicherer gefühlt. | <input type="radio"/>           | <input type="radio"/>        | <input type="radio"/>  | <input type="radio"/>               | <input type="radio"/>                        | <input type="radio"/>                       |

| 9. Wie gut hat Sie die Rat Simulator B auf das <u>gesamte</u> Kurstraining an der lebenden Ratte vorbereitet? |                       |                       |                       |                       |                       |
|---------------------------------------------------------------------------------------------------------------|-----------------------|-----------------------|-----------------------|-----------------------|-----------------------|
| Sehr gut                                                                                                      | Ziemlich gut          | Eher gut              | Eher schlecht         | Ziemlich schlecht     | Sehr schlecht         |
| 1                                                                                                             | 2                     | 3                     | 4                     | 5                     | 6                     |
| <input type="radio"/>                                                                                         | <input type="radio"/> | <input type="radio"/> | <input type="radio"/> | <input type="radio"/> | <input type="radio"/> |

10. Wie gut hat Sie die Rat Simulator B auf die folgenden Methoden im Kurstraining an der lebenden Ratte vorbereitet?

|                                                    | Sehr gut<br>1         | Ziemlich gut<br>2     | Eher gut<br>3         | Eher schlecht<br>4    | Ziemlich schlecht<br>5 | Sehr schlecht<br>6    | Methode nicht trainiert. |
|----------------------------------------------------|-----------------------|-----------------------|-----------------------|-----------------------|------------------------|-----------------------|--------------------------|
| <b>Versuchstierkundliche Methoden</b>              |                       |                       |                       |                       |                        |                       |                          |
| Handling - Transfer von Käfig zu Käfig             | <input type="radio"/>  | <input type="radio"/> | <input type="radio"/>    |
| Fixieren mit Nackengriff                           | <input type="radio"/>  | <input type="radio"/> | <input type="radio"/>    |
| Fixieren mit oberem Schultergriff                  | <input type="radio"/>  | <input type="radio"/> | <input type="radio"/>    |
| Fixieren mit mittlerem Schultergriff               | <input type="radio"/>  | <input type="radio"/> | <input type="radio"/>    |
| Fixieren mit unterem Schultergriff                 | <input type="radio"/>  | <input type="radio"/> | <input type="radio"/>    |
| Applikation per os mit Sonde                       | <input type="radio"/>  | <input type="radio"/> | <input type="radio"/>    |
| Applikation intravenös in die laterale Schwanzvene | <input type="radio"/>  | <input type="radio"/> | <input type="radio"/>    |
| Blutentnahme aus der lateralen Schwanzvene         | <input type="radio"/>  | <input type="radio"/> | <input type="radio"/>    |
| Sonstiges:                                         | <input type="radio"/>  | <input type="radio"/> | <input type="radio"/>    |
|                                                    | <input type="radio"/>  | <input type="radio"/> | <input type="radio"/>    |

11. Was hat Ihnen an der Rat Simulator B besonders gut gefallen?

12. Was hat Ihnen an der Rat Simulator B nicht gefallen?

13. Was würden Sie an der Rat Simulator B gerne verbessern?

14. Mit welchen Tierarten werden Sie nach bestandem Kurs in den nächsten 6 Monaten voraussichtlich versuchstierkundlich arbeiten?  
Mehrfachantworten sind bei den Tierarten möglich.

- |                                      |                                  |                                                     |
|--------------------------------------|----------------------------------|-----------------------------------------------------|
| <input type="checkbox"/> Ratte       | <input type="checkbox"/> Schwein | <input type="checkbox"/> Hund                       |
| <input type="checkbox"/> Maus        | <input type="checkbox"/> Schaf   | <input type="checkbox"/> Katze                      |
| <input type="checkbox"/> Kaninchen   | <input type="checkbox"/> Ziege   | <input type="checkbox"/> Sonstiges _____            |
| <input type="checkbox"/> Meerschwein | <input type="checkbox"/> Rind    | <input type="checkbox"/> Keine                      |
| <input type="checkbox"/> Hamster     | <input type="checkbox"/> Pferd   | <input type="checkbox"/> Kann ich nicht beurteilen. |

15. Wie alt sind Sie?

\_\_\_\_\_ Jahre



**16. Welches Geschlecht haben Sie?**

- ☐ Männlich
- ☐ Weiblich
- ☐ Divers
- ☐ Keine Angabe

**17. Bitte kreuzen Sie Ihren höchsten abgeschlossenen Bildungsabschluss an.**

Nur eine Antwort ist möglich

- ☐ (Noch) kein beruflicher Abschluss
- ☐ Abgeschlossene berufliche-/ betriebliche-/ schulische Ausbildung
- ☐ Abgeschlossene Ausbildung an Fachschule, Meister-, Technikerschule, Berufs- oder Fachakademie
- ☐ Fachhochschulabschluss
- ☐ Bachelorabschluss
- ☐ Master-, Magister-, Diplom- oder Staatsexamensabschluss
- ☐ Promotion
- ☐ Sonstiges: \_\_\_\_\_

**18. Bitte vervollständigen Sie den Satz:**

Nur eine Antwort ist möglich.

**Ich besuche den Kurs als ...**

- ☐ ...wissenschaftlich Beschäftigte/r.
- ☐ ...wissenschaftlich-technische/r Mitarbeiter/in.
- ☐ ...Auszubildende/r.
- ☐ ...Studierende/r.
- ☐ ...Sonstiges: \_\_\_\_\_.

**19. Aus welcher Fachrichtung kommen Sie?**

Nur eine Antwort ist möglich.

- ☐ Humanmedizin
- ☐ Veterinärmedizin
- ☐ Zahnmedizin
- ☐ Pharmazie
- ☐ Biologie
- ☐ Chemie
- ☐ Physik
- ☐ Biotechnologie
- ☐ Ernährungswissenschaft
- ☐ Sonstiges: \_\_\_\_\_

**20. Hatten Sie vor dem Kurs bereits Erfahrung ...**

Nur eine Antwort ist möglich.

**...im Handling von Ratten?**

- ☐ Ja, viel.
- ☐ Ja, etwas.
- ☐ Nein, gar keine.

**21. Hatten Sie vor dem Kurs bereits Erfahrung ...**

Nur eine Antwort ist möglich.

**...im Handling von Mäusen?**

- ☐ Ja, viel.
- ☐ Ja, etwas.
- ☐ Nein, gar keine.

**22. Haben Sie vor dem Kurs schon einmal mit Simulatoren gearbeitet?**

Mehrere Antworten für Simulatoren sind möglich. Bitte beschreiben Sie das Modell kurz.

- ☐ Ja, ...
  - ☐ ...mit Ratten-Simulatoren: Modell: \_\_\_\_\_
  - ☐ ...mit Maus-Simulatoren: Modell: \_\_\_\_\_
  - ☐ ...mit sonstigen Simulatoren: Modell: \_\_\_\_\_
- ☐ Nein.

**Haben Sie weitere Anmerkungen, Lob oder Kritik? Wir freuen uns über Ihr Feedback!**

**Herzlichen Dank für Ihre Teilnahme!**

**Das SimulRATor-Team**

**[web: www.simulator.de](http://web: www.simulator.de) mail: [kontakt@simulator.de](mailto:kontakt@simulator.de)**

# Herzlich willkommen bei „SimulRATor“

## Wir laden Sie ein, an unserer Umfrage über versuchstierkundliche Simulatoren teilzunehmen.

**Wir sind ein Team aus Wissenschaftler/innen** der Institute für Veterinär-Anatomie, für Tierschutz, Tierverhalten und Versuchstierkunde und für Veterinär-Epidemiologie und Biometrie am Fachbereich Veterinärmedizin der Freien Universität Berlin **und evaluieren in einem Forschungsprojekt alle derzeit kommerziell erhältlichen Ratten- und Maussimulatoren** in versuchstierkundlichen Kursen.

**Da Sie als Kursteilnehmer/in am besten bewerten können**, wie gut man an einem Simulator trainieren und sich auf die praktischen Übungen am Tier im Kurs vorbereiten kann, bitten wir Sie um **Ihr persönliches Feedback über die Stärken und Schwächen der Simulatoren** mit denen Sie im Kurs trainiert haben.

**Danke für Ihre Unterstützung!**

### **Das SimulRATor-Team**

Weitere Informationen finden Sie auf [www.simulator.de](http://www.simulator.de) oder schreiben Sie uns auf [kontakt@simulator.de](mailto:kontakt@simulator.de).

### **Teil 1 von 2 Rat Simulator C**

ID: \_\_\_\_\_

→ **Bitte merken Sie sich Ihre ID für Teil 2.**  
**Danke!**

Hinweis zum Datenschutz: Ihre Teilnahme an der Umfrage ist freiwillig. Die Umfragedaten werden anonymisiert gespeichert und verwaltet. Keinesfalls werden Daten an Dritte weitergegeben. Wir erheben keine personenbezogenen Daten von Ihnen. Es sind keine Rückschlüsse auf Ihre Teilnahme möglich. Nur Projektbeteiligte haben Zugriff auf die von Ihnen innerhalb des Fragebogens gemachten Angaben und sind zur Verschwiegenheit verpflichtet. Die gemachten Angaben werden ausschließlich für Forschungszwecke genutzt. Sie können die Umfrage jederzeit ohne Angabe von Gründen abbrechen.

| 1. Wie gut gelangen Ihnen die versuchstierkundlichen Methoden an der Rat Simulator C? |                       |                           |                       |                       |                       |                       |                                |
|---------------------------------------------------------------------------------------|-----------------------|---------------------------|-----------------------|-----------------------|-----------------------|-----------------------|--------------------------------|
|                                                                                       | Sehr<br>schlecht<br>1 | Ziemlich<br>schlecht<br>2 | Eher<br>schlecht<br>3 | Eher<br>gut<br>4      | Ziemlich<br>gut<br>5  | Sehr<br>gut<br>6      | Methode<br>nicht<br>trainiert. |
| Versuchstierkundliche Methoden                                                        |                       |                           |                       |                       |                       |                       |                                |
| Handling - Transfer von Käfig zu Käfig                                                | <input type="radio"/> | <input type="radio"/>     | <input type="radio"/> | <input type="radio"/> | <input type="radio"/> | <input type="radio"/> | <input type="radio"/>          |
| Fixieren mit Nackengriff                                                              | <input type="radio"/> | <input type="radio"/>     | <input type="radio"/> | <input type="radio"/> | <input type="radio"/> | <input type="radio"/> | <input type="radio"/>          |
| Fixieren mit oberem Schultergriff                                                     | <input type="radio"/> | <input type="radio"/>     | <input type="radio"/> | <input type="radio"/> | <input type="radio"/> | <input type="radio"/> | <input type="radio"/>          |
| Fixieren mit mittlerem Schultergriff                                                  | <input type="radio"/> | <input type="radio"/>     | <input type="radio"/> | <input type="radio"/> | <input type="radio"/> | <input type="radio"/> | <input type="radio"/>          |
| Fixieren mit unterem Schultergriff                                                    | <input type="radio"/> | <input type="radio"/>     | <input type="radio"/> | <input type="radio"/> | <input type="radio"/> | <input type="radio"/> | <input type="radio"/>          |
| Applikation intravenös in die laterale Schwanzvene                                    | <input type="radio"/> | <input type="radio"/>     | <input type="radio"/> | <input type="radio"/> | <input type="radio"/> | <input type="radio"/> | <input type="radio"/>          |
| Blutentnahme aus der Vena saphena                                                     | <input type="radio"/> | <input type="radio"/>     | <input type="radio"/> | <input type="radio"/> | <input type="radio"/> | <input type="radio"/> | <input type="radio"/>          |
| Blutentnahme aus der lateralen Schwanzvene                                            | <input type="radio"/> | <input type="radio"/>     | <input type="radio"/> | <input type="radio"/> | <input type="radio"/> | <input type="radio"/> | <input type="radio"/>          |
| Blutentnahme kardial                                                                  | <input type="radio"/> | <input type="radio"/>     | <input type="radio"/> | <input type="radio"/> | <input type="radio"/> | <input type="radio"/> | <input type="radio"/>          |
| Sonstiges:<br>_____                                                                   | <input type="radio"/> | <input type="radio"/>     | <input type="radio"/> | <input type="radio"/> | <input type="radio"/> | <input type="radio"/> | <input type="radio"/>          |
| _____                                                                                 | <input type="radio"/> | <input type="radio"/>     | <input type="radio"/> | <input type="radio"/> | <input type="radio"/> | <input type="radio"/> | <input type="radio"/>          |

| 2. Wie gut treffen folgenden Aussagen über das Training an der Rat Simulator C zu?                                      |                                 |                              |                        |                                 |                                       |                                         |
|-------------------------------------------------------------------------------------------------------------------------|---------------------------------|------------------------------|------------------------|---------------------------------|---------------------------------------|-----------------------------------------|
|                                                                                                                         | Trifft<br>voll und ganz zu<br>1 | Trifft<br>weitgehend zu<br>2 | Trifft<br>eher zu<br>3 | Trifft<br>eher<br>nicht zu<br>4 | Trifft<br>weitgehend<br>nicht zu<br>5 | Trifft<br>ganz und gar<br>nicht zu<br>6 |
| Die Anzahl an Teilnehmer/innen pro Rat Simulator C war angemessen.                                                      | <input type="radio"/>           | <input type="radio"/>        | <input type="radio"/>  | <input type="radio"/>           | <input type="radio"/>                 | <input type="radio"/>                   |
| Die Trainingsdauer an der Rat Simulator C war ausreichend.                                                              | <input type="radio"/>           | <input type="radio"/>        | <input type="radio"/>  | <input type="radio"/>           | <input type="radio"/>                 | <input type="radio"/>                   |
| Die Methoden lassen sich an der Rat Simulator C zufriedenstellend trainieren.                                           | <input type="radio"/>           | <input type="radio"/>        | <input type="radio"/>  | <input type="radio"/>           | <input type="radio"/>                 | <input type="radio"/>                   |
| Durch das Training an der Rat Simulator C fühle ich mich für das Kurstraining an der lebenden Ratte besser vorbereitet. | <input type="radio"/>           | <input type="radio"/>        | <input type="radio"/>  | <input type="radio"/>           | <input type="radio"/>                 | <input type="radio"/>                   |

| 3. Falls es zu materialbedingten Schwierigkeiten bei der Verwendung der Rat Simulator C kam, bitte nennen Sie uns diese. |       |
|--------------------------------------------------------------------------------------------------------------------------|-------|
| Versuchstierkundliche Methode:                                                                                           | _____ |
| Beschreibung der Komplikation:                                                                                           | _____ |
|                                                                                                                          | _____ |
|                                                                                                                          | _____ |
| Versuchstierkundliche Methode:                                                                                           | _____ |
| Beschreibung der Komplikation:                                                                                           | _____ |
|                                                                                                                          | _____ |
|                                                                                                                          | _____ |

| Haben Sie weitere Anmerkungen, Lob oder Kritik? Wir freuen uns über Ihr Feedback! |
|-----------------------------------------------------------------------------------|
|                                                                                   |

Herzlichen Dank für Ihre Teilnahme!  
 Das SimulRATor-Team [kontakt@simulator.de](mailto:kontakt@simulator.de)

# Herzlich willkommen bei „SimulRATor“

## Wir laden Sie ein, an unserer Umfrage über versuchstierkundliche Simulatoren teilzunehmen.

**Wir sind ein Team aus Wissenschaftler/innen** der Institute für Veterinär-Anatomie, für Tierschutz, Tierverhalten und Versuchstierkunde und für Veterinär-Epidemiologie und Biometrie am Fachbereich Veterinärmedizin der Freien Universität Berlin **und evaluieren in einem Forschungsprojekt alle derzeit kommerziell erhältlichen Ratten- und Maussimulatoren** in versuchstierkundlichen Kursen.

**Da Sie als Kursteilnehmer/in am besten bewerten können**, wie gut man an einem Simulator trainieren und sich auf die praktischen Übungen am Tier im Kurs vorbereiten kann, bitten wir Sie um **Ihr persönliches Feedback über die Stärken und Schwächen der Simulatoren** mit denen Sie im Kurs trainiert haben.

**Danke für Ihre Unterstützung!**

**Das SimulRATor-Team**

Weitere Informationen finden Sie auf [www.simulator.de](http://www.simulator.de) oder schreiben Sie uns auf [kontakt@simulator.de](mailto:kontakt@simulator.de).

### Teil 2 von 2 Rat Simulator C

ID: \_\_\_\_\_

Hinweis zum Datenschutz: Ihre Teilnahme an der Umfrage ist freiwillig. Die Umfragedaten werden anonymisiert gespeichert und verwaltet. Keinesfalls werden Daten an Dritte weitergegeben. Wir erheben keine personenbezogenen Daten von Ihnen. Es sind keine Rückschlüsse auf Ihre Teilnahme möglich. Nur Projektbeteiligte haben Zugriff auf die von Ihnen innerhalb des Fragebogens gemachten Angaben und sind zur Verschwiegenheit verpflichtet. Die gemachten Angaben werden ausschließlich für Forschungszwecke genutzt. Sie können die Umfrage jederzeit ohne Angabe von Gründen abbrechen.

| 1. Wie gut gelangen Ihnen Handling, Fixieren und Markieren an der lebenden Ratte? |                       |                       |                       |                       |                       |                       |                          |
|-----------------------------------------------------------------------------------|-----------------------|-----------------------|-----------------------|-----------------------|-----------------------|-----------------------|--------------------------|
|                                                                                   | Sehr gut              | Ziemlich gut          | Eher gut              | Eher schlecht         | Ziemlich schlecht     | Sehr schlecht         | Methode nicht trainiert. |
| Versuchstierkundliche Methoden                                                    | 1                     | 2                     | 3                     | 4                     | 5                     | 6                     |                          |
| Handling - Transfer von Käfig zu Käfig                                            | <input type="radio"/>    |
| Fixieren mit Nackengriff                                                          | <input type="radio"/>    |
| Fixieren mit oberem Schultergriff                                                 | <input type="radio"/>    |
| Fixieren mit mittlerem Schultergriff                                              | <input type="radio"/>    |
| Fixieren mit unterem Schultergriff                                                | <input type="radio"/>    |
| Ohrlochmarkierung                                                                 | <input type="radio"/>    |
| Sonstiges:                                                                        | <input type="radio"/>    |
|                                                                                   | <input type="radio"/>    |

| 2. Wie gut gelangen Ihnen die folgenden versuchstierkundlichen Methoden an der lebenden Ratte?                    |                       |                       |                       |                       |                       |                       |                       |                          |
|-------------------------------------------------------------------------------------------------------------------|-----------------------|-----------------------|-----------------------|-----------------------|-----------------------|-----------------------|-----------------------|--------------------------|
| Bitte kreuzen Sie zusätzlich das Kästchen der letzten Spalte an, wenn die Ratte für die Methode narkotisiert war. |                       |                       |                       |                       |                       |                       |                       |                          |
|                                                                                                                   | Sehr gut              | Ziemlich gut          | Eher gut              | Eher schlecht         | Ziemlich schlecht     | Sehr schlecht         | Nicht trainiert.      | Ratte in Narkose.        |
| Versuchstierkundliche Methoden                                                                                    | 1                     | 2                     | 3                     | 4                     | 5                     | 6                     |                       |                          |
| Applikation per os ohne Sonde                                                                                     | <input type="radio"/> | <input type="checkbox"/> |
| Applikation per os mit Sonde                                                                                      | <input type="radio"/> | <input type="checkbox"/> |
| Applikation subkutan Nackenhautfalte                                                                              | <input type="radio"/> | <input type="checkbox"/> |
| Applikation subkutan seitliche Bauchhautfalte (Flanke)                                                            | <input type="radio"/> | <input type="checkbox"/> |
| Applikation intramuskulär                                                                                         | <input type="radio"/> | <input type="checkbox"/> |
| Applikation intraperitoneal                                                                                       | <input type="radio"/> | <input type="checkbox"/> |
| Applikation intravenös in die dorsale Penisvene                                                                   | <input type="radio"/> | <input type="checkbox"/> |
| Applikation intravenös in die laterale Schwanzvene                                                                | <input type="radio"/> | <input type="checkbox"/> |
| Blutentnahme aus der Vena sublingualis                                                                            | <input type="radio"/> | <input type="checkbox"/> |
| Blutentnahme aus retrobulbärem Venenplexus                                                                        | <input type="radio"/> | <input type="checkbox"/> |
| Blutentnahme aus der Vena saphena                                                                                 | <input type="radio"/> | <input type="checkbox"/> |
| Blutentnahme aus der lateralen Schwanzvene                                                                        | <input type="radio"/> | <input type="checkbox"/> |
| Blutentnahme kardial                                                                                              | <input type="radio"/> | <input type="checkbox"/> |
| Sonstiges:                                                                                                        | <input type="radio"/> | <input type="checkbox"/> |
|                                                                                                                   | <input type="radio"/> | <input type="checkbox"/> |

| 3. Welche 3 Methoden an der lebenden Ratte sind Ihrer Meinung nach besonders anspruchsvoll für die/den Durchzuführende(n)? |       |
|----------------------------------------------------------------------------------------------------------------------------|-------|
| Bitte nennen Sie 3 Methoden aus der 1. und 2. Frage. Bitte geben Sie diese vollständig an.                                 |       |
| 1.                                                                                                                         | _____ |
| 2.                                                                                                                         | _____ |
| 3.                                                                                                                         | _____ |

| 4. Bitte wählen Sie aus der unten stehenden Liste die 5 Methoden an der lebenden Ratte, für die Sie ein vorbereitendes Training an Simulatoren für besonders sinnvoll einschätzen. |                                                        |
|------------------------------------------------------------------------------------------------------------------------------------------------------------------------------------|--------------------------------------------------------|
| Sie können bis zu 5 Methoden auswählen.                                                                                                                                            |                                                        |
| <input type="checkbox"/>                                                                                                                                                           | Handling - Transfer von Käfig zu Käfig                 |
| <input type="checkbox"/>                                                                                                                                                           | Fixieren (mit verschiedenen Griffen)                   |
| <input type="checkbox"/>                                                                                                                                                           | Ohrlochmarkierung                                      |
| <input type="checkbox"/>                                                                                                                                                           | Applikation per os ohne Sonde                          |
| <input type="checkbox"/>                                                                                                                                                           | Applikation per os mit Sonde                           |
| <input type="checkbox"/>                                                                                                                                                           | Applikation subkutan Nackenhautfalte                   |
| <input type="checkbox"/>                                                                                                                                                           | Applikation subkutan seitliche Bauchhautfalte (Flanke) |
| <input type="checkbox"/>                                                                                                                                                           | Applikation intramuskulär                              |
| <input type="checkbox"/>                                                                                                                                                           | Applikation intraperitoneal                            |
| <input type="checkbox"/>                                                                                                                                                           | Applikation intravenös in die dorsale Penisvene        |
| <input type="checkbox"/>                                                                                                                                                           | Applikation intravenös in die laterale Schwanzvene     |
| <input type="checkbox"/>                                                                                                                                                           | Blutentnahme aus der Vena sublingualis                 |
| <input type="checkbox"/>                                                                                                                                                           | Blutentnahme aus retrobulbärem Venenplexus             |
| <input type="checkbox"/>                                                                                                                                                           | Blutentnahme aus der Vena saphena                      |
| <input type="checkbox"/>                                                                                                                                                           | Blutentnahme aus der lateralen Schwanzvene             |
| <input type="checkbox"/>                                                                                                                                                           | Blutentnahme kardial                                   |

| 5. Würden Sie sich ein Simulator-Training auch für andere Methoden an der Ratte wünschen? |  |
|-------------------------------------------------------------------------------------------|--|
| Falls ja, beschreiben Sie uns bitte, welche Methode(n) Ihnen wichtig wäre(n).             |  |
|                                                                                           |  |

## Ihr persönliches Feedback zur Rat Simulator C

### 6. Wie realitätsnah sind folgende Merkmale an der Rat Simulator C im Vergleich zu einer echten Ratte?

| Merkmale                                                                                 | Sehr<br>realistisch<br>1 | Ziemlich<br>realistisch<br>2 | Eher<br>realistisch<br>3 | Eher<br>unrealistisch<br>4 | Ziemlich<br>unrealistisch<br>5 | Sehr<br>unrealistisch<br>6 |
|------------------------------------------------------------------------------------------|--------------------------|------------------------------|--------------------------|----------------------------|--------------------------------|----------------------------|
| Gesamterscheinung                                                                        | <input type="radio"/>    | <input type="radio"/>        | <input type="radio"/>    | <input type="radio"/>      | <input type="radio"/>          | <input type="radio"/>      |
| Haptik  | <input type="radio"/>    | <input type="radio"/>        | <input type="radio"/>    | <input type="radio"/>      | <input type="radio"/>          | <input type="radio"/>      |
| Verschieblichkeit der Haut im Nacken                                                     | <input type="radio"/>    | <input type="radio"/>        | <input type="radio"/>    | <input type="radio"/>      | <input type="radio"/>          | <input type="radio"/>      |
| Verschieblichkeit der Haut an der seitlichen Bauchwand (Flanke)                          | <input type="radio"/>    | <input type="radio"/>        | <input type="radio"/>    | <input type="radio"/>      | <input type="radio"/>          | <input type="radio"/>      |
| Konsistenz der Hautoberfläche                                                            | <input type="radio"/>    | <input type="radio"/>        | <input type="radio"/>    | <input type="radio"/>      | <input type="radio"/>          | <input type="radio"/>      |
| Körpergröße                                                                              | <input type="radio"/>    | <input type="radio"/>        | <input type="radio"/>    | <input type="radio"/>      | <input type="radio"/>          | <input type="radio"/>      |
| Gewicht                                                                                  | <input type="radio"/>    | <input type="radio"/>        | <input type="radio"/>    | <input type="radio"/>      | <input type="radio"/>          | <input type="radio"/>      |
| Körperform                                                                               | <input type="radio"/>    | <input type="radio"/>        | <input type="radio"/>    | <input type="radio"/>      | <input type="radio"/>          | <input type="radio"/>      |
| Proportionen                                                                             | <input type="radio"/>    | <input type="radio"/>        | <input type="radio"/>    | <input type="radio"/>      | <input type="radio"/>          | <input type="radio"/>      |

### 7. Wie realitätsnah war für Sie das Training an der Rat Simulator C im Vergleich zu einer echten Ratte?

| Versuchstierkundliche Methoden                     | Sehr<br>realistisch<br>1 | Ziemlich<br>realistisch<br>2 | Eher<br>realistisch<br>3 | Eher<br>unrealistisch<br>4 | Ziemlich<br>unrealistisch<br>5 | Sehr<br>unrealistisch<br>6 | Methode<br>nicht trainiert. |
|----------------------------------------------------|--------------------------|------------------------------|--------------------------|----------------------------|--------------------------------|----------------------------|-----------------------------|
| Handling - Transfer von Käfig zu Käfig             | <input type="radio"/>    | <input type="radio"/>        | <input type="radio"/>    | <input type="radio"/>      | <input type="radio"/>          | <input type="radio"/>      | <input type="radio"/>       |
| Fixieren mit Nackengriff                           | <input type="radio"/>    | <input type="radio"/>        | <input type="radio"/>    | <input type="radio"/>      | <input type="radio"/>          | <input type="radio"/>      | <input type="radio"/>       |
| Fixieren mit oberem Schultergriff                  | <input type="radio"/>    | <input type="radio"/>        | <input type="radio"/>    | <input type="radio"/>      | <input type="radio"/>          | <input type="radio"/>      | <input type="radio"/>       |
| Fixieren mit mittlerem Schultergriff               | <input type="radio"/>    | <input type="radio"/>        | <input type="radio"/>    | <input type="radio"/>      | <input type="radio"/>          | <input type="radio"/>      | <input type="radio"/>       |
| Fixieren mit unterem Schultergriff                 | <input type="radio"/>    | <input type="radio"/>        | <input type="radio"/>    | <input type="radio"/>      | <input type="radio"/>          | <input type="radio"/>      | <input type="radio"/>       |
| Applikation intravenös in die laterale Schwanzvene | <input type="radio"/>    | <input type="radio"/>        | <input type="radio"/>    | <input type="radio"/>      | <input type="radio"/>          | <input type="radio"/>      | <input type="radio"/>       |
| Blutentnahme aus der Vena saphena                  | <input type="radio"/>    | <input type="radio"/>        | <input type="radio"/>    | <input type="radio"/>      | <input type="radio"/>          | <input type="radio"/>      | <input type="radio"/>       |
| Blutentnahme aus der lateralen Schwanzvene         | <input type="radio"/>    | <input type="radio"/>        | <input type="radio"/>    | <input type="radio"/>      | <input type="radio"/>          | <input type="radio"/>      | <input type="radio"/>       |
| Blutentnahme kardial                               | <input type="radio"/>    | <input type="radio"/>        | <input type="radio"/>    | <input type="radio"/>      | <input type="radio"/>          | <input type="radio"/>      | <input type="radio"/>       |
| Sonstiges:                                         | <input type="radio"/>    | <input type="radio"/>        | <input type="radio"/>    | <input type="radio"/>      | <input type="radio"/>          | <input type="radio"/>      | <input type="radio"/>       |
|                                                    | <input type="radio"/>    | <input type="radio"/>        | <input type="radio"/>    | <input type="radio"/>      | <input type="radio"/>          | <input type="radio"/>      | <input type="radio"/>       |

### 8. Wie gut treffen folgende Aussagen über das Training an der Rat Simulator C zu?

|                                                                                                      | Trifft<br>voll und ganz zu<br>1 | Trifft<br>weitgehend zu<br>2 | Trifft<br>eher zu<br>3 | Trifft<br>eher nicht zu<br>4 | Trifft<br>weitgehend<br>nicht zu<br>5 | Trifft ganz und<br>gar nicht zu<br>6 |
|------------------------------------------------------------------------------------------------------|---------------------------------|------------------------------|------------------------|------------------------------|---------------------------------------|--------------------------------------|
| Ich habe mich beim <b>Handling und Fixieren</b> an der lebenden Ratte sicherer gefühlt.              | <input type="radio"/>           | <input type="radio"/>        | <input type="radio"/>  | <input type="radio"/>        | <input type="radio"/>                 | <input type="radio"/>                |
| Ich habe mich bei den <b>versuchstierkundlichen Methoden</b> an der lebenden Ratte sicherer gefühlt. | <input type="radio"/>           | <input type="radio"/>        | <input type="radio"/>  | <input type="radio"/>        | <input type="radio"/>                 | <input type="radio"/>                |

| 9. Wie gut hat Sie die Rat Simulator C auf das gesamte Kurstraining an der lebenden Ratte vorbereitet? |                       |                       |                       |                       |                       |
|--------------------------------------------------------------------------------------------------------|-----------------------|-----------------------|-----------------------|-----------------------|-----------------------|
| Sehr gut                                                                                               | Ziemlich gut          | Eher gut              | Eher schlecht         | Ziemlich schlecht     | Sehr schlecht         |
| 1                                                                                                      | 2                     | 3                     | 4                     | 5                     | 6                     |
| <input type="radio"/>                                                                                  | <input type="radio"/> | <input type="radio"/> | <input type="radio"/> | <input type="radio"/> | <input type="radio"/> |

| 10. Wie gut hat Sie die Rat Simulator C auf die folgenden Methoden im Kurstraining an der lebenden Ratte vorbereitet? |                       |                       |                       |                       |                        |                       |                          |
|-----------------------------------------------------------------------------------------------------------------------|-----------------------|-----------------------|-----------------------|-----------------------|------------------------|-----------------------|--------------------------|
|                                                                                                                       | Sehr gut<br>1         | Ziemlich gut<br>2     | Eher gut<br>3         | Eher schlecht<br>4    | Ziemlich schlecht<br>5 | Sehr schlecht<br>6    | Methode nicht trainiert. |
| <b>Versuchstierkundliche Methoden</b>                                                                                 |                       |                       |                       |                       |                        |                       |                          |
| Handling - Transfer von Käfig zu Käfig                                                                                | <input type="radio"/>  | <input type="radio"/> | <input type="radio"/>    |
| Fixieren mit Nackengriff                                                                                              | <input type="radio"/>  | <input type="radio"/> | <input type="radio"/>    |
| Fixieren mit oberem Schultergriff                                                                                     | <input type="radio"/>  | <input type="radio"/> | <input type="radio"/>    |
| Fixieren mit mittlerem Schultergriff                                                                                  | <input type="radio"/>  | <input type="radio"/> | <input type="radio"/>    |
| Fixieren mit unterem Schultergriff                                                                                    | <input type="radio"/>  | <input type="radio"/> | <input type="radio"/>    |
| Applikation intravenös in die laterale Schwanzvene                                                                    | <input type="radio"/>  | <input type="radio"/> | <input type="radio"/>    |
| Blutentnahme aus der Vena saphena                                                                                     | <input type="radio"/>  | <input type="radio"/> | <input type="radio"/>    |
| Blutentnahme aus der lateralen Schwanzvene                                                                            | <input type="radio"/>  | <input type="radio"/> | <input type="radio"/>    |
| Blutentnahme kardial                                                                                                  | <input type="radio"/>  | <input type="radio"/> | <input type="radio"/>    |
| Sonstiges:                                                                                                            | <input type="radio"/>  | <input type="radio"/> | <input type="radio"/>    |
|                                                                                                                       | <input type="radio"/>  | <input type="radio"/> | <input type="radio"/>    |

| 11. Was hat Ihnen an der Rat Simulator C besonders gut gefallen? |
|------------------------------------------------------------------|
| <br><br><br><br><br><br><br><br><br><br>                         |

| 12. Was hat Ihnen an der Rat Simulator C <u>nicht</u> gefallen? |
|-----------------------------------------------------------------|
| <br><br><br><br><br><br><br><br><br><br>                        |

| 13. Was würden Sie an der Rat Simulator C gerne verbessern? |
|-------------------------------------------------------------|
| <br><br><br><br><br><br><br><br><br><br>                    |

14. Mit welchen Tierarten werden Sie nach bestandenen Kurs in den nächsten 6 Monaten voraussichtlich versuchstierkundlich arbeiten?  
 Mehrfachantworten sind bei den Tierarten möglich.

- |                                      |                                  |                                                     |
|--------------------------------------|----------------------------------|-----------------------------------------------------|
| <input type="checkbox"/> Ratte       | <input type="checkbox"/> Schwein | <input type="checkbox"/> Hund                       |
| <input type="checkbox"/> Maus        | <input type="checkbox"/> Schaf   | <input type="checkbox"/> Katze                      |
| <input type="checkbox"/> Kaninchen   | <input type="checkbox"/> Ziege   | <input type="checkbox"/> Sonstiges _____            |
| <input type="checkbox"/> Meerschwein | <input type="checkbox"/> Rind    | <input type="checkbox"/> Keine                      |
| <input type="checkbox"/> Hamster     | <input type="checkbox"/> Pferd   | <input type="checkbox"/> Kann ich nicht beurteilen. |

15. Wie alt sind Sie?  
 \_\_\_\_\_ Jahre

**16. Welches Geschlecht haben Sie?**

- ☐ Männlich
- ☐ Weiblich
- ☐ Divers
- ☐ Keine Angabe

**17. Bitte kreuzen Sie Ihren höchsten abgeschlossenen Bildungsabschluss an.**

Nur eine Antwort ist möglich

- ☐ (Noch) kein beruflicher Abschluss
- ☐ Abgeschlossene berufliche-/ betriebliche-/ schulische Ausbildung
- ☐ Abgeschlossene Ausbildung an Fachschule, Meister-, Technikerschule, Berufs- oder Fachakademie
- ☐ Fachhochschulabschluss
- ☐ Bachelorabschluss
- ☐ Master-, Magister-, Diplom- oder Staatsexamensabschluss
- ☐ Promotion
- ☐ Sonstiges: \_\_\_\_\_

**18. Bitte vervollständigen Sie den Satz:**

Nur eine Antwort ist möglich.

**Ich besuche den Kurs als ...**

- ☐ ...wissenschaftlich Beschäftigte/r.
- ☐ ...wissenschaftlich-technische/r Mitarbeiter/in.
- ☐ ...Auszubildende/r.
- ☐ ...Studierende/r.
- ☐ ...Sonstiges: \_\_\_\_\_.

**19. Aus welcher Fachrichtung kommen Sie?**

Nur eine Antwort ist möglich.

- ☐ Humanmedizin
- ☐ Veterinärmedizin
- ☐ Zahnmedizin
- ☐ Pharmazie
- ☐ Biologie
- ☐ Chemie
- ☐ Physik
- ☐ Biotechnologie
- ☐ Ernährungswissenschaft
- ☐ Sonstiges: \_\_\_\_\_

**20. Hatten Sie vor dem Kurs bereits Erfahrung ...**

Nur eine Antwort ist möglich.

**...im Handling von Ratten?**

- ☐ Ja, viel.
- ☐ Ja, etwas.
- ☐ Nein, gar keine.

**21. Hatten Sie vor dem Kurs bereits Erfahrung ...**

Nur eine Antwort ist möglich.

**...im Handling von Mäusen?**

- ☐ Ja, viel.
- ☐ Ja, etwas.
- ☐ Nein, gar keine.

**22. Haben Sie vor dem Kurs schon einmal mit Simulatoren gearbeitet?**

Mehrere Antworten für Simulatoren sind möglich. Bitte beschreiben Sie das Modell kurz.

- ☐ Ja, ...
  - ☐ ...mit Ratten-Simulatoren: Modell: \_\_\_\_\_
  - ☐ ...mit Maus-Simulatoren: Modell: \_\_\_\_\_
  - ☐ ...mit sonstigen Simulatoren: Modell: \_\_\_\_\_
- ☐ Nein.

**Haben Sie weitere Anmerkungen, Lob oder Kritik? Wir freuen uns über Ihr Feedback!**

**Herzlichen Dank für Ihre Teilnahme!**

**Das SimulRATor-Team**

**[web: www.simulator.de](http://web: www.simulator.de) mail: [kontakt@simulator.de](mailto:kontakt@simulator.de)**



# Herzlich willkommen bei „SimulRATor“

## Wir laden Sie ein, an unserer Umfrage über versuchstierkundliche Simulatoren teilzunehmen.

Wir sind ein Team aus Wissenschaftler/innen der Institute für Veterinär-Anatomie, für Tierschutz, Tierverhalten und Versuchstierkunde und für Veterinär-Epidemiologie und Biometrie am Fachbereich Veterinärmedizin der Freien Universität Berlin und **evaluieren in einem Forschungsprojekt alle derzeit kommerziell erhältlichen Ratten- und Maussimulatoren** in versuchstierkundlichen Kursen.

Da Sie als Kursteilnehmer/in am besten bewerten können, wie gut man an einem Simulator trainieren und sich auf die praktischen Übungen am Tier im Kurs vorbereiten kann, bitten wir Sie um Ihr **persönliches Feedback über die Stärken und Schwächen der Simulatoren** mit denen Sie im Kurs trainiert haben.

**Danke für Ihre Unterstützung!**

### **Das SimulRATor-Team**

Weitere Informationen finden Sie auf [www.simulrator.de](http://www.simulrator.de) oder schreiben Sie uns auf [kontakt@simulrator.de](mailto:kontakt@simulrator.de).

### Teil 1 von 2 Rat Simulator D

ID: \_\_\_\_\_

➔ Bitte merken Sie sich Ihre ID für Teil 2.  
**Danke!**

Hinweis zum Datenschutz: Ihre Teilnahme an der Umfrage ist freiwillig. Die Umfragedaten werden anonymisiert gespeichert und verwaltet. Keinesfalls werden Daten an Dritte weitergegeben. Wir erheben keine personenbezogenen Daten von Ihnen. Es sind keine Rückschlüsse auf Ihre Teilnahme möglich. Nur Projektbeteiligte haben Zugriff auf die von Ihnen innerhalb des Fragebogens gemachten Angaben und sind zur Verschwiegenheit verpflichtet. Die gemachten Angaben werden ausschließlich für Forschungszwecke genutzt. Sie können die Umfrage jederzeit ohne Angabe von Gründen abbrechen.

| 1. Wie gut gelangen Ihnen die versuchstierkundlichen Methoden an der Rat Simulator D? |                       |                           |                       |                       |                       |                       |                                |
|---------------------------------------------------------------------------------------|-----------------------|---------------------------|-----------------------|-----------------------|-----------------------|-----------------------|--------------------------------|
|                                                                                       | Sehr<br>schlecht<br>1 | Ziemlich<br>schlecht<br>2 | Eher<br>schlecht<br>3 | Eher<br>gut<br>4      | Ziemlich<br>gut<br>5  | Sehr<br>gut<br>6      | Methode<br>nicht<br>trainiert. |
| Versuchstierkundliche Methoden                                                        |                       |                           |                       |                       |                       |                       |                                |
| Handling - Transfer von Käfig zu Käfig                                                | <input type="radio"/> | <input type="radio"/>     | <input type="radio"/> | <input type="radio"/> | <input type="radio"/> | <input type="radio"/> | <input type="radio"/>          |
| Fixieren mit Nackengriff                                                              | <input type="radio"/> | <input type="radio"/>     | <input type="radio"/> | <input type="radio"/> | <input type="radio"/> | <input type="radio"/> | <input type="radio"/>          |
| Fixieren mit oberem Schultergriff                                                     | <input type="radio"/> | <input type="radio"/>     | <input type="radio"/> | <input type="radio"/> | <input type="radio"/> | <input type="radio"/> | <input type="radio"/>          |
| Fixieren mit mittlerem Schultergriff                                                  | <input type="radio"/> | <input type="radio"/>     | <input type="radio"/> | <input type="radio"/> | <input type="radio"/> | <input type="radio"/> | <input type="radio"/>          |
| Fixieren mit unterem Schultergriff                                                    | <input type="radio"/> | <input type="radio"/>     | <input type="radio"/> | <input type="radio"/> | <input type="radio"/> | <input type="radio"/> | <input type="radio"/>          |
| Ohrlochmarkierung                                                                     | <input type="radio"/> | <input type="radio"/>     | <input type="radio"/> | <input type="radio"/> | <input type="radio"/> | <input type="radio"/> | <input type="radio"/>          |
| Applikation intravenös in die laterale Schwanzvene                                    | <input type="radio"/> | <input type="radio"/>     | <input type="radio"/> | <input type="radio"/> | <input type="radio"/> | <input type="radio"/> | <input type="radio"/>          |
| Blutentnahme aus der lateralen Schwanzvene                                            | <input type="radio"/> | <input type="radio"/>     | <input type="radio"/> | <input type="radio"/> | <input type="radio"/> | <input type="radio"/> | <input type="radio"/>          |
| Sonstiges:                                                                            | <input type="radio"/> | <input type="radio"/>     | <input type="radio"/> | <input type="radio"/> | <input type="radio"/> | <input type="radio"/> | <input type="radio"/>          |
|                                                                                       | <input type="radio"/> | <input type="radio"/>     | <input type="radio"/> | <input type="radio"/> | <input type="radio"/> | <input type="radio"/> | <input type="radio"/>          |

| 2. Wie gut treffen folgenden Aussagen über das Training an der Rat Simulator D zu?                                      |                                 |                              |                        |                                 |                                       |                                         |
|-------------------------------------------------------------------------------------------------------------------------|---------------------------------|------------------------------|------------------------|---------------------------------|---------------------------------------|-----------------------------------------|
|                                                                                                                         | Trifft<br>voll und ganz zu<br>1 | Trifft<br>weitgehend zu<br>2 | Trifft<br>eher zu<br>3 | Trifft<br>eher<br>nicht zu<br>4 | Trifft<br>weitgehend<br>nicht zu<br>5 | Trifft<br>ganz und gar<br>nicht zu<br>6 |
| Die Anzahl an Teilnehmer/innen pro Rat Simulator D war angemessen.                                                      | <input type="radio"/>           | <input type="radio"/>        | <input type="radio"/>  | <input type="radio"/>           | <input type="radio"/>                 | <input type="radio"/>                   |
| Die Trainingsdauer an der Rat Simulator D war ausreichend.                                                              | <input type="radio"/>           | <input type="radio"/>        | <input type="radio"/>  | <input type="radio"/>           | <input type="radio"/>                 | <input type="radio"/>                   |
| Die Methoden lassen sich an der Rat Simulator D zufriedenstellend trainieren.                                           | <input type="radio"/>           | <input type="radio"/>        | <input type="radio"/>  | <input type="radio"/>           | <input type="radio"/>                 | <input type="radio"/>                   |
| Durch das Training an der Rat Simulator D fühle ich mich für das Kurstraining an der lebenden Ratte besser vorbereitet. | <input type="radio"/>           | <input type="radio"/>        | <input type="radio"/>  | <input type="radio"/>           | <input type="radio"/>                 | <input type="radio"/>                   |

| 3. Falls es zu materialbedingten Schwierigkeiten bei der Verwendung der Rat Simulator D kam, bitte nennen Sie uns diese. |       |
|--------------------------------------------------------------------------------------------------------------------------|-------|
| Versuchstierkundliche Methode:                                                                                           | _____ |
| Beschreibung der Komplikation:                                                                                           | _____ |
|                                                                                                                          | _____ |
| Versuchstierkundliche Methode:                                                                                           | _____ |
| Beschreibung der Komplikation:                                                                                           | _____ |
|                                                                                                                          | _____ |
|                                                                                                                          | _____ |

| Haben Sie weitere Anmerkungen, Lob oder Kritik? Wir freuen uns über Ihr Feedback! |
|-----------------------------------------------------------------------------------|
|                                                                                   |

Herzlichen Dank für Ihre Teilnahme!  
 Das SimulRATor-Team [kontakt@simulator.de](mailto:kontakt@simulator.de)

# Herzlich willkommen bei „SimulRATor“

## Wir laden Sie ein, an unserer Umfrage über versuchstierkundliche Simulatoren teilzunehmen.

**Wir sind ein Team aus Wissenschaftler/innen** der Institute für Veterinär-Anatomie, für Tierschutz, Tierverhalten und Versuchstierkunde und für Veterinär-Epidemiologie und Biometrie am Fachbereich Veterinärmedizin der Freien Universität Berlin **und evaluieren in einem Forschungsprojekt alle derzeit kommerziell erhältlichen Ratten- und Maussimulatoren** in versuchstierkundlichen Kursen.

**Da Sie als Kursteilnehmer/in am besten bewerten können**, wie gut man an einem Simulator trainieren und sich auf die praktischen Übungen am Tier im Kurs vorbereiten kann, bitten wir Sie um **Ihr persönliches Feedback über die Stärken und Schwächen der Simulatoren** mit denen Sie im Kurs trainiert haben.

**Danke für Ihre Unterstützung!**

**Das SimulRATor-Team**

Weitere Informationen finden Sie auf [www.simulator.de](http://www.simulator.de) oder schreiben Sie uns auf [kontakt@simulator.de](mailto:kontakt@simulator.de).

### Teil 2 von 2 Rat Simualtor D

ID: \_\_\_\_\_

Hinweis zum Datenschutz: Ihre Teilnahme an der Umfrage ist freiwillig. Die Umfragedaten werden anonymisiert gespeichert und verwaltet. Keinesfalls werden Daten an Dritte weitergegeben. Wir erheben keine personenbezogenen Daten von Ihnen. Es sind keine Rückschlüsse auf Ihre Teilnahme möglich. Nur Projektbeteiligte haben Zugriff auf die von Ihnen innerhalb des Fragebogens gemachten Angaben und sind zur Verschwiegenheit verpflichtet. Die gemachten Angaben werden ausschließlich für Forschungszwecke genutzt. Sie können die Umfrage jederzeit ohne Angabe von Gründen abbrechen.

| 1. Wie gut gelangen Ihnen Handling, Fixieren und Markieren an der lebenden Ratte? |                       |                       |                       |                       |                       |                       |                          |
|-----------------------------------------------------------------------------------|-----------------------|-----------------------|-----------------------|-----------------------|-----------------------|-----------------------|--------------------------|
|                                                                                   | Sehr gut              | Ziemlich gut          | Eher gut              | Eher schlecht         | Ziemlich schlecht     | Sehr schlecht         | Methode nicht trainiert. |
| Versuchstierkundliche Methoden                                                    | 1                     | 2                     | 3                     | 4                     | 5                     | 6                     |                          |
| Handling - Transfer von Käfig zu Käfig                                            | <input type="radio"/>    |
| Fixieren mit Nackengriff                                                          | <input type="radio"/>    |
| Fixieren mit oberem Schultergriff                                                 | <input type="radio"/>    |
| Fixieren mit mittlerem Schultergriff                                              | <input type="radio"/>    |
| Fixieren mit unterem Schultergriff                                                | <input type="radio"/>    |
| Ohrlochmarkierung                                                                 | <input type="radio"/>    |
| Sonstiges:                                                                        | <input type="radio"/>    |
|                                                                                   | <input type="radio"/>    |

| 2. Wie gut gelangen Ihnen die folgenden versuchstierkundlichen Methoden an der lebenden Ratte?                    |                       |                       |                       |                       |                       |                       |                       |                          |
|-------------------------------------------------------------------------------------------------------------------|-----------------------|-----------------------|-----------------------|-----------------------|-----------------------|-----------------------|-----------------------|--------------------------|
| Bitte kreuzen Sie zusätzlich das Kästchen der letzten Spalte an, wenn die Ratte für die Methode narkotisiert war. |                       |                       |                       |                       |                       |                       |                       |                          |
|                                                                                                                   | Sehr gut              | Ziemlich gut          | Eher gut              | Eher schlecht         | Ziemlich schlecht     | Sehr schlecht         | Nicht trainiert.      | Ratte in Narkose.        |
| Versuchstierkundliche Methoden                                                                                    | 1                     | 2                     | 3                     | 4                     | 5                     | 6                     |                       |                          |
| Applikation per os ohne Sonde                                                                                     | <input type="radio"/> | <input type="checkbox"/> |
| Applikation per os mit Sonde                                                                                      | <input type="radio"/> | <input type="checkbox"/> |
| Applikation subkutan Nackenhautfalte                                                                              | <input type="radio"/> | <input type="checkbox"/> |
| Applikation subkutan seitliche Bauchhautfalte (Flanke)                                                            | <input type="radio"/> | <input type="checkbox"/> |
| Applikation intramuskulär                                                                                         | <input type="radio"/> | <input type="checkbox"/> |
| Applikation intraperitoneal                                                                                       | <input type="radio"/> | <input type="checkbox"/> |
| Applikation intravenös in die dorsale Penisvene                                                                   | <input type="radio"/> | <input type="checkbox"/> |
| Applikation intravenös in die laterale Schwanzvene                                                                | <input type="radio"/> | <input type="checkbox"/> |
| Blutentnahme aus der Vena sublingualis                                                                            | <input type="radio"/> | <input type="checkbox"/> |
| Blutentnahme aus retrobulbärem Venenplexus                                                                        | <input type="radio"/> | <input type="checkbox"/> |
| Blutentnahme aus der Vena saphena                                                                                 | <input type="radio"/> | <input type="checkbox"/> |
| Blutentnahme aus der lateralen Schwanzvene                                                                        | <input type="radio"/> | <input type="checkbox"/> |
| Blutentnahme kardial                                                                                              | <input type="radio"/> | <input type="checkbox"/> |
| Sonstiges:                                                                                                        | <input type="radio"/> | <input type="checkbox"/> |
|                                                                                                                   | <input type="radio"/> | <input type="checkbox"/> |

| 3. Welche 3 Methoden an der lebenden Ratte sind Ihrer Meinung nach besonders anspruchsvoll für die/den Durchzuführende(n)? |       |
|----------------------------------------------------------------------------------------------------------------------------|-------|
| Bitte nennen Sie 3 Methoden aus der 1. und 2. Frage. Bitte geben Sie diese vollständig an.                                 |       |
| 1.                                                                                                                         | _____ |
| 2.                                                                                                                         | _____ |
| 3.                                                                                                                         | _____ |

| 4. Bitte wählen Sie aus der unten stehenden Liste die 5 Methoden an der lebenden Ratte, für die Sie ein vorbereitendes Training an Simulatoren für besonders sinnvoll einschätzen. |                                                        |
|------------------------------------------------------------------------------------------------------------------------------------------------------------------------------------|--------------------------------------------------------|
| Sie können bis zu 5 Methoden auswählen.                                                                                                                                            |                                                        |
| <input type="checkbox"/>                                                                                                                                                           | Handling - Transfer von Käfig zu Käfig                 |
| <input type="checkbox"/>                                                                                                                                                           | Fixieren (mit verschiedenen Griffen)                   |
| <input type="checkbox"/>                                                                                                                                                           | Ohrlochmarkierung                                      |
| <input type="checkbox"/>                                                                                                                                                           | Applikation per os ohne Sonde                          |
| <input type="checkbox"/>                                                                                                                                                           | Applikation per os mit Sonde                           |
| <input type="checkbox"/>                                                                                                                                                           | Applikation subkutan Nackenhautfalte                   |
| <input type="checkbox"/>                                                                                                                                                           | Applikation subkutan seitliche Bauchhautfalte (Flanke) |
| <input type="checkbox"/>                                                                                                                                                           | Applikation intramuskulär                              |
| <input type="checkbox"/>                                                                                                                                                           | Applikation intraperitoneal                            |
| <input type="checkbox"/>                                                                                                                                                           | Applikation intravenös in die dorsale Penisvene        |
| <input type="checkbox"/>                                                                                                                                                           | Applikation intravenös in die laterale Schwanzvene     |
| <input type="checkbox"/>                                                                                                                                                           | Blutentnahme aus der Vena sublingualis                 |
| <input type="checkbox"/>                                                                                                                                                           | Blutentnahme aus retrobulbärem Venenplexus             |
| <input type="checkbox"/>                                                                                                                                                           | Blutentnahme aus der Vena saphena                      |
| <input type="checkbox"/>                                                                                                                                                           | Blutentnahme aus der lateralen Schwanzvene             |
| <input type="checkbox"/>                                                                                                                                                           | Blutentnahme kardial                                   |

| 5. Würden Sie sich ein Simulator-Training auch für andere Methoden an der Ratte wünschen? |  |
|-------------------------------------------------------------------------------------------|--|
| Falls ja, beschreiben Sie uns bitte, welche Methode(n) Ihnen wichtig wäre(n).             |  |
| <div style="border: 1px solid black; height: 50px; width: 100%;"></div>                   |  |

## Ihr persönliches Feedback zur Rat Simulator D

### 6. Wie realitätsnah sind folgende Merkmale an der Rat Simulator D im Vergleich zu einer echten Ratte?

| Merkmale                                                                                 | Sehr<br>realistisch<br>1 | Ziemlich<br>realistisch<br>2 | Eher<br>realistisch<br>3 | Eher<br>unrealistisch<br>4 | Ziemlich<br>unrealistisch<br>5 | Sehr<br>unrealistisch<br>6 |
|------------------------------------------------------------------------------------------|--------------------------|------------------------------|--------------------------|----------------------------|--------------------------------|----------------------------|
| Gesamterscheinung                                                                        | <input type="radio"/>    | <input type="radio"/>        | <input type="radio"/>    | <input type="radio"/>      | <input type="radio"/>          | <input type="radio"/>      |
| Haptik  | <input type="radio"/>    | <input type="radio"/>        | <input type="radio"/>    | <input type="radio"/>      | <input type="radio"/>          | <input type="radio"/>      |
| Verschieblichkeit der Haut im Nacken                                                     | <input type="radio"/>    | <input type="radio"/>        | <input type="radio"/>    | <input type="radio"/>      | <input type="radio"/>          | <input type="radio"/>      |
| Verschieblichkeit der Haut an der seitlichen Bauchwand (Flanke)                          | <input type="radio"/>    | <input type="radio"/>        | <input type="radio"/>    | <input type="radio"/>      | <input type="radio"/>          | <input type="radio"/>      |
| Konsistenz der Hautoberfläche                                                            | <input type="radio"/>    | <input type="radio"/>        | <input type="radio"/>    | <input type="radio"/>      | <input type="radio"/>          | <input type="radio"/>      |
| Körpergröße                                                                              | <input type="radio"/>    | <input type="radio"/>        | <input type="radio"/>    | <input type="radio"/>      | <input type="radio"/>          | <input type="radio"/>      |
| Gewicht                                                                                  | <input type="radio"/>    | <input type="radio"/>        | <input type="radio"/>    | <input type="radio"/>      | <input type="radio"/>          | <input type="radio"/>      |
| Körperform                                                                               | <input type="radio"/>    | <input type="radio"/>        | <input type="radio"/>    | <input type="radio"/>      | <input type="radio"/>          | <input type="radio"/>      |
| Proportionen                                                                             | <input type="radio"/>    | <input type="radio"/>        | <input type="radio"/>    | <input type="radio"/>      | <input type="radio"/>          | <input type="radio"/>      |

### 7. Wie realitätsnah war für Sie das Training an der Rat Simulator D im Vergleich zu einer echten Ratte?

| Versuchstierkundliche Methoden                     | Sehr<br>realistisch<br>1 | Ziemlich<br>realistisch<br>2 | Eher<br>realistisch<br>3 | Eher<br>unrealistisch<br>4 | Ziemlich<br>unrealistisch<br>5 | Sehr<br>unrealistisch<br>6 | Methode<br>nicht trainiert. |
|----------------------------------------------------|--------------------------|------------------------------|--------------------------|----------------------------|--------------------------------|----------------------------|-----------------------------|
| Handling - Transfer von Käfig zu Käfig             | <input type="radio"/>    | <input type="radio"/>        | <input type="radio"/>    | <input type="radio"/>      | <input type="radio"/>          | <input type="radio"/>      | <input type="radio"/>       |
| Fixieren mit Nackengriff                           | <input type="radio"/>    | <input type="radio"/>        | <input type="radio"/>    | <input type="radio"/>      | <input type="radio"/>          | <input type="radio"/>      | <input type="radio"/>       |
| Fixieren mit oberem Schultergriff                  | <input type="radio"/>    | <input type="radio"/>        | <input type="radio"/>    | <input type="radio"/>      | <input type="radio"/>          | <input type="radio"/>      | <input type="radio"/>       |
| Fixieren mit mittlerem Schultergriff               | <input type="radio"/>    | <input type="radio"/>        | <input type="radio"/>    | <input type="radio"/>      | <input type="radio"/>          | <input type="radio"/>      | <input type="radio"/>       |
| Fixieren mit unterem Schultergriff                 | <input type="radio"/>    | <input type="radio"/>        | <input type="radio"/>    | <input type="radio"/>      | <input type="radio"/>          | <input type="radio"/>      | <input type="radio"/>       |
| Ohrlochmarkierung                                  | <input type="radio"/>    | <input type="radio"/>        | <input type="radio"/>    | <input type="radio"/>      | <input type="radio"/>          | <input type="radio"/>      | <input type="radio"/>       |
| Applikation intravenös in die laterale Schwanzvene | <input type="radio"/>    | <input type="radio"/>        | <input type="radio"/>    | <input type="radio"/>      | <input type="radio"/>          | <input type="radio"/>      | <input type="radio"/>       |
| Blutentnahme aus der lateralen Schwanzvene         | <input type="radio"/>    | <input type="radio"/>        | <input type="radio"/>    | <input type="radio"/>      | <input type="radio"/>          | <input type="radio"/>      | <input type="radio"/>       |
| Sonstiges:                                         | <input type="radio"/>    | <input type="radio"/>        | <input type="radio"/>    | <input type="radio"/>      | <input type="radio"/>          | <input type="radio"/>      | <input type="radio"/>       |
|                                                    | <input type="radio"/>    | <input type="radio"/>        | <input type="radio"/>    | <input type="radio"/>      | <input type="radio"/>          | <input type="radio"/>      | <input type="radio"/>       |

### 8. Wie gut treffen folgende Aussagen über das Training an der Rat Simulator D zu?

|                                                                                                      | Trifft<br>voll und ganz zu<br>1 | Trifft<br>weitgehend zu<br>2 | Trifft<br>eher zu<br>3 | Trifft<br>eher nicht zu<br>4 | Trifft<br>weitgehend<br>nicht zu<br>5 | Trifft ganz und<br>gar nicht zu<br>6 |
|------------------------------------------------------------------------------------------------------|---------------------------------|------------------------------|------------------------|------------------------------|---------------------------------------|--------------------------------------|
| Ich habe mich beim <b>Handling und Fixieren</b> an der lebenden Ratte sicherer gefühlt.              | <input type="radio"/>           | <input type="radio"/>        | <input type="radio"/>  | <input type="radio"/>        | <input type="radio"/>                 | <input type="radio"/>                |
| Ich habe mich bei den <b>versuchstierkundlichen Methoden</b> an der lebenden Ratte sicherer gefühlt. | <input type="radio"/>           | <input type="radio"/>        | <input type="radio"/>  | <input type="radio"/>        | <input type="radio"/>                 | <input type="radio"/>                |

| 9. Wie gut hat Sie die Rat Simulator D auf das <u>gesamte</u> Kurstraining an der lebenden Ratte vorbereitet? |                       |                       |                       |                       |                       |
|---------------------------------------------------------------------------------------------------------------|-----------------------|-----------------------|-----------------------|-----------------------|-----------------------|
| Sehr gut                                                                                                      | Ziemlich gut          | Eher gut              | Eher schlecht         | Ziemlich schlecht     | Sehr schlecht         |
| 1                                                                                                             | 2                     | 3                     | 4                     | 5                     | 6                     |
| <input type="radio"/>                                                                                         | <input type="radio"/> | <input type="radio"/> | <input type="radio"/> | <input type="radio"/> | <input type="radio"/> |

| 10. Wie gut hat Sie die Rat Simulator D auf die folgenden Methoden im Kurstraining an der lebenden Ratte vorbereitet? |                       |                       |                       |                       |                        |                       |                          |
|-----------------------------------------------------------------------------------------------------------------------|-----------------------|-----------------------|-----------------------|-----------------------|------------------------|-----------------------|--------------------------|
|                                                                                                                       | Sehr gut<br>1         | Ziemlich gut<br>2     | Eher gut<br>3         | Eher schlecht<br>4    | Ziemlich schlecht<br>5 | Sehr schlecht<br>6    | Methode nicht trainiert. |
| <b>Versuchstierkundliche Methoden</b>                                                                                 |                       |                       |                       |                       |                        |                       |                          |
| Handling - Transfer von Käfig zu Käfig                                                                                | <input type="radio"/>  | <input type="radio"/> | <input type="radio"/>    |
| Fixieren mit Nackengriff                                                                                              | <input type="radio"/>  | <input type="radio"/> | <input type="radio"/>    |
| Fixieren mit oberem Schultergriff                                                                                     | <input type="radio"/>  | <input type="radio"/> | <input type="radio"/>    |
| Fixieren mit mittlerem Schultergriff                                                                                  | <input type="radio"/>  | <input type="radio"/> | <input type="radio"/>    |
| Fixieren mit unterem Schultergriff                                                                                    | <input type="radio"/>  | <input type="radio"/> | <input type="radio"/>    |
| Ohrlochmarkierung                                                                                                     | <input type="radio"/>  | <input type="radio"/> | <input type="radio"/>    |
| Applikation intravenös in die laterale Schwanzvene                                                                    | <input type="radio"/>  | <input type="radio"/> | <input type="radio"/>    |
| Blutentnahme aus der lateralen Schwanzvene                                                                            | <input type="radio"/>  | <input type="radio"/> | <input type="radio"/>    |
| Sonstiges:                                                                                                            | <input type="radio"/>  | <input type="radio"/> | <input type="radio"/>    |
|                                                                                                                       | <input type="radio"/>  | <input type="radio"/> | <input type="radio"/>    |

| 11. Was hat Ihnen an der Rat Simulator D besonders gut gefallen? |
|------------------------------------------------------------------|
| <br><br><br><br><br><br><br><br><br><br>                         |

| 12. Was hat Ihnen an der Rat Simulator D <u>nicht</u> gefallen? |
|-----------------------------------------------------------------|
| <br><br><br><br><br><br><br><br><br><br>                        |

| 13. Was würden Sie an der Rat Simulator D gerne verbessern? |
|-------------------------------------------------------------|
| <br><br><br><br><br><br><br><br><br><br>                    |

14. Mit welchen Tierarten werden Sie nach bestandem Kurs in den nächsten 6 Monaten voraussichtlich versuchstierkundlich arbeiten?  
 Mehrfachantworten sind bei den Tierarten möglich.

|                                      |                                  |                                                     |
|--------------------------------------|----------------------------------|-----------------------------------------------------|
| <input type="checkbox"/> Ratte       | <input type="checkbox"/> Schwein | <input type="checkbox"/> Hund                       |
| <input type="checkbox"/> Maus        | <input type="checkbox"/> Schaf   | <input type="checkbox"/> Katze                      |
| <input type="checkbox"/> Kaninchen   | <input type="checkbox"/> Ziege   | <input type="checkbox"/> Sonstiges _____            |
| <input type="checkbox"/> Meerschwein | <input type="checkbox"/> Rind    | <input type="checkbox"/> Keine                      |
| <input type="checkbox"/> Hamster     | <input type="checkbox"/> Pferd   | <input type="checkbox"/> Kann ich nicht beurteilen. |

15. Wie alt sind Sie?  
 \_\_\_\_\_ Jahre

**16. Welches Geschlecht haben Sie?**

- ☐ Männlich
- ☐ Weiblich
- ☐ Divers
- ☐ Keine Angabe

**17. Bitte kreuzen Sie Ihren höchsten abgeschlossenen Bildungsabschluss an.**

Nur eine Antwort ist möglich

- ☐ (Noch) kein beruflicher Abschluss
- ☐ Abgeschlossene berufliche-/ betriebliche-/ schulische Ausbildung
- ☐ Abgeschlossene Ausbildung an Fachschule, Meister-, Technikerschule, Berufs- oder Fachakademie
- ☐ Fachhochschulabschluss
- ☐ Bachelorabschluss
- ☐ Master-, Magister-, Diplom- oder Staatsexamensabschluss
- ☐ Promotion
- ☐ Sonstiges: \_\_\_\_\_

**18. Bitte vervollständigen Sie den Satz:**

Nur eine Antwort ist möglich.

**Ich besuche den Kurs als ...**

- ☐ ...wissenschaftlich Beschäftigte/r.
- ☐ ...wissenschaftlich-technische/r Mitarbeiter/in.
- ☐ ...Auszubildende/r.
- ☐ ...Studierende/r.
- ☐ ...Sonstiges: \_\_\_\_\_.

**19. Aus welcher Fachrichtung kommen Sie?**

Nur eine Antwort ist möglich.

- ☐ Humanmedizin
- ☐ Veterinärmedizin
- ☐ Zahnmedizin
- ☐ Pharmazie
- ☐ Biologie
- ☐ Chemie
- ☐ Physik
- ☐ Biotechnologie
- ☐ Ernährungswissenschaft
- ☐ Sonstiges: \_\_\_\_\_

**20. Hatten Sie vor dem Kurs bereits Erfahrung ...**

Nur eine Antwort ist möglich.

**...im Handling von Ratten?**

- ☐ Ja, viel.
- ☐ Ja, etwas.
- ☐ Nein, gar keine.

**21. Hatten Sie vor dem Kurs bereits Erfahrung ...**

Nur eine Antwort ist möglich.

**...im Handling von Mäusen?**

- ☐ Ja, viel.
- ☐ Ja, etwas.
- ☐ Nein, gar keine.

**22. Haben Sie vor dem Kurs schon einmal mit Simulatoren gearbeitet?**

Mehrere Antworten für Simulatoren sind möglich. Bitte beschreiben Sie das Modell kurz.

- ☐ Ja, ...
  - ☐ ...mit Ratten-Simulatoren: Modell: \_\_\_\_\_
  - ☐ ...mit Maus-Simulatoren: Modell: \_\_\_\_\_
  - ☐ ...mit sonstigen Simulatoren: Modell: \_\_\_\_\_
- ☐ Nein.

**Haben Sie weitere Anmerkungen, Lob oder Kritik? Wir freuen uns über Ihr Feedback!**

**Herzlichen Dank für Ihre Teilnahme!**

**Das SimulRATor-Team**

**[web: www.simulator.de](http://web: www.simulator.de) mail: [kontakt@simulator.de](mailto:kontakt@simulator.de)**

# Herzlich willkommen bei „SimulRATor“

## Wir laden Sie ein, an unserer Umfrage über versuchstierkundliche Simulatoren teilzunehmen.

Wir sind ein Team aus Wissenschaftler/innen der Institute für Veterinär-Anatomie, für Tierschutz, Tierverhalten und Versuchstierkunde und für Veterinär-Epidemiologie und Biometrie am Fachbereich Veterinärmedizin der Freien Universität Berlin und **evaluieren in einem Forschungsprojekt alle derzeit kommerziell erhältlichen Ratten- und Maussimulatoren** in versuchstierkundlichen Kursen.

Da Sie als Kursteilnehmer/in am besten bewerten können, wie gut man an einem Simulator trainieren und sich auf die praktischen Übungen am Tier im Kurs vorbereiten kann, bitten wir Sie um Ihr **persönliches Feedback über die Stärken und Schwächen der Simulatoren** mit denen Sie im Kurs trainiert haben.

**Danke für Ihre Unterstützung!**

### **Das SimulRATor-Team**

Weitere Informationen finden Sie auf [www.simulrator.de](http://www.simulrator.de) oder schreiben Sie uns auf [kontakt@simulrator.de](mailto:kontakt@simulrator.de).

### **Teil 1 von 2 Rat Simulator E**

ID: \_\_\_\_\_

→ Bitte merken Sie sich Ihre ID für Teil 2.  
**Danke!**

Hinweis zum Datenschutz: Ihre Teilnahme an der Umfrage ist freiwillig. Die Umfragedaten werden anonymisiert gespeichert und verwaltet. Keinesfalls werden Daten an Dritte weitergegeben. Wir erheben keine personenbezogenen Daten von Ihnen. Es sind keine Rückschlüsse auf Ihre Teilnahme möglich. Nur Projektbeteiligte haben Zugriff auf die von Ihnen innerhalb des Fragebogens gemachten Angaben und sind zur Verschwiegenheit verpflichtet. Die gemachten Angaben werden ausschließlich für Forschungszwecke genutzt. Sie können die Umfrage jederzeit ohne Angabe von Gründen abbrechen.



| 1. Wie gut gelangen Ihnen die versuchstierkundlichen Methoden an der Rat Simulator E? |                       |                           |                       |                       |                       |                       |                                |
|---------------------------------------------------------------------------------------|-----------------------|---------------------------|-----------------------|-----------------------|-----------------------|-----------------------|--------------------------------|
|                                                                                       | Sehr<br>schlecht<br>1 | Ziemlich<br>schlecht<br>2 | Eher<br>schlecht<br>3 | Eher<br>gut<br>4      | Ziemlich<br>gut<br>5  | Sehr<br>gut<br>6      | Methode<br>nicht<br>trainiert. |
| Versuchstierkundliche Methoden                                                        |                       |                           |                       |                       |                       |                       |                                |
| Handling - Transfer von Käfig zu Käfig                                                | <input type="radio"/> | <input type="radio"/>     | <input type="radio"/> | <input type="radio"/> | <input type="radio"/> | <input type="radio"/> | <input type="radio"/>          |
| Fixieren mit Nackengriff                                                              | <input type="radio"/> | <input type="radio"/>     | <input type="radio"/> | <input type="radio"/> | <input type="radio"/> | <input type="radio"/> | <input type="radio"/>          |
| Fixieren mit oberem Schultergriff                                                     | <input type="radio"/> | <input type="radio"/>     | <input type="radio"/> | <input type="radio"/> | <input type="radio"/> | <input type="radio"/> | <input type="radio"/>          |
| Fixieren mit mittlerem Schultergriff                                                  | <input type="radio"/> | <input type="radio"/>     | <input type="radio"/> | <input type="radio"/> | <input type="radio"/> | <input type="radio"/> | <input type="radio"/>          |
| Fixieren mit unterem Schultergriff                                                    | <input type="radio"/> | <input type="radio"/>     | <input type="radio"/> | <input type="radio"/> | <input type="radio"/> | <input type="radio"/> | <input type="radio"/>          |
| Applikation per os mit Sonde                                                          | <input type="radio"/> | <input type="radio"/>     | <input type="radio"/> | <input type="radio"/> | <input type="radio"/> | <input type="radio"/> | <input type="radio"/>          |
| Applikation subkutan Nackenhautfalte                                                  | <input type="radio"/> | <input type="radio"/>     | <input type="radio"/> | <input type="radio"/> | <input type="radio"/> | <input type="radio"/> | <input type="radio"/>          |
| Applikation subkutan seitliche Bauchhautfalte (Flanke)                                | <input type="radio"/> | <input type="radio"/>     | <input type="radio"/> | <input type="radio"/> | <input type="radio"/> | <input type="radio"/> | <input type="radio"/>          |
| Applikation intramuskulär                                                             | <input type="radio"/> | <input type="radio"/>     | <input type="radio"/> | <input type="radio"/> | <input type="radio"/> | <input type="radio"/> | <input type="radio"/>          |
| Applikation intravenös in die laterale Schwanzvene                                    | <input type="radio"/> | <input type="radio"/>     | <input type="radio"/> | <input type="radio"/> | <input type="radio"/> | <input type="radio"/> | <input type="radio"/>          |
| Blutentnahme aus der lateralen Schwanzvene                                            | <input type="radio"/> | <input type="radio"/>     | <input type="radio"/> | <input type="radio"/> | <input type="radio"/> | <input type="radio"/> | <input type="radio"/>          |
| Sonstiges:                                                                            | <input type="radio"/> | <input type="radio"/>     | <input type="radio"/> | <input type="radio"/> | <input type="radio"/> | <input type="radio"/> | <input type="radio"/>          |
|                                                                                       | <input type="radio"/> | <input type="radio"/>     | <input type="radio"/> | <input type="radio"/> | <input type="radio"/> | <input type="radio"/> | <input type="radio"/>          |

| 2. Wie gut treffen folgenden Aussagen über das Training an der Rat Simulator E zu?                                      |                                 |                              |                        |                                 |                                       |                                         |
|-------------------------------------------------------------------------------------------------------------------------|---------------------------------|------------------------------|------------------------|---------------------------------|---------------------------------------|-----------------------------------------|
|                                                                                                                         | Trifft<br>voll und ganz zu<br>1 | Trifft<br>weitgehend zu<br>2 | Trifft<br>eher zu<br>3 | Trifft<br>eher<br>nicht zu<br>4 | Trifft<br>weitgehend<br>nicht zu<br>5 | Trifft<br>ganz und gar<br>nicht zu<br>6 |
| Die Anzahl an Teilnehmer/innen pro Rat Simulator E war angemessen.                                                      | <input type="radio"/>           | <input type="radio"/>        | <input type="radio"/>  | <input type="radio"/>           | <input type="radio"/>                 | <input type="radio"/>                   |
| Die Trainingsdauer an der Rat Simulator E war ausreichend.                                                              | <input type="radio"/>           | <input type="radio"/>        | <input type="radio"/>  | <input type="radio"/>           | <input type="radio"/>                 | <input type="radio"/>                   |
| Die Methoden lassen sich an der Rat Simulator E zufriedenstellend trainieren.                                           | <input type="radio"/>           | <input type="radio"/>        | <input type="radio"/>  | <input type="radio"/>           | <input type="radio"/>                 | <input type="radio"/>                   |
| Durch das Training an der Rat Simulator E fühle ich mich für das Kurstraining an der lebenden Ratte besser vorbereitet. | <input type="radio"/>           | <input type="radio"/>        | <input type="radio"/>  | <input type="radio"/>           | <input type="radio"/>                 | <input type="radio"/>                   |

| 3. Falls es zu materialbedingten Schwierigkeiten bei der Verwendung der Rat Simulator E kam, bitte nennen Sie uns diese. |       |
|--------------------------------------------------------------------------------------------------------------------------|-------|
| Versuchstierkundliche Methode:                                                                                           | _____ |
| Beschreibung der Komplikation:                                                                                           | _____ |
|                                                                                                                          | _____ |
| Versuchstierkundliche Methode:                                                                                           | _____ |
| Beschreibung der Komplikation:                                                                                           | _____ |
|                                                                                                                          | _____ |
|                                                                                                                          | _____ |

| Haben Sie weitere Anmerkungen, Lob oder Kritik? Wir freuen uns über Ihr Feedback! |
|-----------------------------------------------------------------------------------|
|                                                                                   |

Herzlichen Dank für Ihre Teilnahme!

Das SimuRATor-Team [kontakt@simulator.de](mailto:kontakt@simulator.de)

# Herzlich willkommen bei „SimulRATor“

## Wir laden Sie ein, an unserer Umfrage über versuchstierkundliche Simulatoren teilzunehmen.

**Wir sind ein Team aus Wissenschaftler/innen** der Institute für Veterinär-Anatomie, für Tierschutz, Tierverhalten und Versuchstierkunde und für Veterinär-Epidemiologie und Biometrie am Fachbereich Veterinärmedizin der Freien Universität Berlin **und evaluieren in einem Forschungsprojekt alle derzeit kommerziell erhältlichen Ratten- und Maussimulatoren** in versuchstierkundlichen Kursen.

**Da Sie als Kursteilnehmer/in am besten bewerten können**, wie gut man an einem Simulator trainieren und sich auf die praktischen Übungen am Tier im Kurs vorbereiten kann, bitten wir Sie um **Ihr persönliches Feedback über die Stärken und Schwächen der Simulatoren** mit denen Sie im Kurs trainiert haben.

**Danke für Ihre Unterstützung!**

### **Das SimulRATor-Team**

Weitere Informationen finden Sie auf [www.simulator.de](http://www.simulator.de) oder schreiben Sie uns auf [kontakt@simulator.de](mailto:kontakt@simulator.de).

### **Teil 2 von 2 Rat Simulator E**

ID: \_\_\_\_\_

Hinweis zum Datenschutz: Ihre Teilnahme an der Umfrage ist freiwillig. Die Umfragedaten werden anonymisiert gespeichert und verwaltet. Keinesfalls werden Daten an Dritte weitergegeben. Wir erheben keine personenbezogenen Daten von Ihnen. Es sind keine Rückschlüsse auf Ihre Teilnahme möglich. Nur Projektbeteiligte haben Zugriff auf die von Ihnen innerhalb des Fragebogens gemachten Angaben und sind zur Verschwiegenheit verpflichtet. Die gemachten Angaben werden ausschließlich für Forschungszwecke genutzt. Sie können die Umfrage jederzeit ohne Angabe von Gründen abbrechen.

| 1. Wie gut gelangen Ihnen Handling, Fixieren und Markieren an der lebenden Ratte? |                       |                       |                       |                       |                       |                       |                          |
|-----------------------------------------------------------------------------------|-----------------------|-----------------------|-----------------------|-----------------------|-----------------------|-----------------------|--------------------------|
|                                                                                   | Sehr gut              | Ziemlich gut          | Eher gut              | Eher schlecht         | Ziemlich schlecht     | Sehr schlecht         | Methode nicht trainiert. |
| Versuchstierkundliche Methoden                                                    | 1                     | 2                     | 3                     | 4                     | 5                     | 6                     |                          |
| Handling - Transfer von Käfig zu Käfig                                            | <input type="radio"/>    |
| Fixieren mit Nackengriff                                                          | <input type="radio"/>    |
| Fixieren mit oberem Schultergriff                                                 | <input type="radio"/>    |
| Fixieren mit mittlerem Schultergriff                                              | <input type="radio"/>    |
| Fixieren mit unterem Schultergriff                                                | <input type="radio"/>    |
| Ohrlochmarkierung                                                                 | <input type="radio"/>    |
| Sonstiges:                                                                        | <input type="radio"/>    |
|                                                                                   | <input type="radio"/>    |

| 2. Wie gut gelangen Ihnen die folgenden versuchstierkundlichen Methoden an der lebenden Ratte?                    |                       |                       |                       |                       |                       |                       |                       |                          |
|-------------------------------------------------------------------------------------------------------------------|-----------------------|-----------------------|-----------------------|-----------------------|-----------------------|-----------------------|-----------------------|--------------------------|
| Bitte kreuzen Sie zusätzlich das Kästchen der letzten Spalte an, wenn die Ratte für die Methode narkotisiert war. |                       |                       |                       |                       |                       |                       |                       |                          |
|                                                                                                                   | Sehr gut              | Ziemlich gut          | Eher gut              | Eher schlecht         | Ziemlich schlecht     | Sehr schlecht         | Nicht trainiert.      | Ratte in Narkose.        |
| Versuchstierkundliche Methoden                                                                                    | 1                     | 2                     | 3                     | 4                     | 5                     | 6                     |                       |                          |
| Applikation per os ohne Sonde                                                                                     | <input type="radio"/> | <input type="checkbox"/> |
| Applikation per os mit Sonde                                                                                      | <input type="radio"/> | <input type="checkbox"/> |
| Applikation subkutan Nackenhautfalte                                                                              | <input type="radio"/> | <input type="checkbox"/> |
| Applikation subkutan seitliche Bauchhautfalte (Flanke)                                                            | <input type="radio"/> | <input type="checkbox"/> |
| Applikation intramuskulär                                                                                         | <input type="radio"/> | <input type="checkbox"/> |
| Applikation intraperitoneal                                                                                       | <input type="radio"/> | <input type="checkbox"/> |
| Applikation intravenös in die dorsale Penisvene                                                                   | <input type="radio"/> | <input type="checkbox"/> |
| Applikation intravenös in die laterale Schwanzvene                                                                | <input type="radio"/> | <input type="checkbox"/> |
| Blutentnahme aus der Vena sublingualis                                                                            | <input type="radio"/> | <input type="checkbox"/> |
| Blutentnahme aus retrobulbärem Venenplexus                                                                        | <input type="radio"/> | <input type="checkbox"/> |
| Blutentnahme aus der Vena saphena                                                                                 | <input type="radio"/> | <input type="checkbox"/> |
| Blutentnahme aus der lateralen Schwanzvene                                                                        | <input type="radio"/> | <input type="checkbox"/> |
| Blutentnahme kardial                                                                                              | <input type="radio"/> | <input type="checkbox"/> |
| Sonstiges:                                                                                                        | <input type="radio"/> | <input type="checkbox"/> |
|                                                                                                                   | <input type="radio"/> | <input type="checkbox"/> |

| 3. Welche 3 Methoden an der lebenden Ratte sind Ihrer Meinung nach besonders anspruchsvoll für die/den Durchzuführende(n)? |       |
|----------------------------------------------------------------------------------------------------------------------------|-------|
| Bitte nennen Sie 3 Methoden aus der 1. und 2. Frage. Bitte geben Sie diese vollständig an.                                 |       |
| 1.                                                                                                                         | _____ |
| 2.                                                                                                                         | _____ |
| 3.                                                                                                                         | _____ |

| 4. Bitte wählen Sie aus der unten stehenden Liste die 5 Methoden an der lebenden Ratte, für die Sie ein vorbereitendes Training an Simulatoren für besonders sinnvoll einschätzen. |                                                        |
|------------------------------------------------------------------------------------------------------------------------------------------------------------------------------------|--------------------------------------------------------|
| Sie können bis zu 5 Methoden auswählen.                                                                                                                                            |                                                        |
| <input type="checkbox"/>                                                                                                                                                           | Handling - Transfer von Käfig zu Käfig                 |
| <input type="checkbox"/>                                                                                                                                                           | Fixieren (mit verschiedenen Griffen)                   |
| <input type="checkbox"/>                                                                                                                                                           | Ohrlochmarkierung                                      |
| <input type="checkbox"/>                                                                                                                                                           | Applikation per os ohne Sonde                          |
| <input type="checkbox"/>                                                                                                                                                           | Applikation per os mit Sonde                           |
| <input type="checkbox"/>                                                                                                                                                           | Applikation subkutan Nackenhautfalte                   |
| <input type="checkbox"/>                                                                                                                                                           | Applikation subkutan seitliche Bauchhautfalte (Flanke) |
| <input type="checkbox"/>                                                                                                                                                           | Applikation intramuskulär                              |
| <input type="checkbox"/>                                                                                                                                                           | Applikation intraperitoneal                            |
| <input type="checkbox"/>                                                                                                                                                           | Applikation intravenös in die dorsale Penisvene        |
| <input type="checkbox"/>                                                                                                                                                           | Applikation intravenös in die laterale Schwanzvene     |
| <input type="checkbox"/>                                                                                                                                                           | Blutentnahme aus der Vena sublingualis                 |
| <input type="checkbox"/>                                                                                                                                                           | Blutentnahme aus retrobulbärem Venenplexus             |
| <input type="checkbox"/>                                                                                                                                                           | Blutentnahme aus der Vena saphena                      |
| <input type="checkbox"/>                                                                                                                                                           | Blutentnahme aus der lateralen Schwanzvene             |
| <input type="checkbox"/>                                                                                                                                                           | Blutentnahme kardial                                   |

| 5. Würden Sie sich ein Simulator-Training auch für andere Methoden an der Ratte wünschen? |  |
|-------------------------------------------------------------------------------------------|--|
| Falls ja, beschreiben Sie uns bitte, welche Methode(n) Ihnen wichtig wäre(n).             |  |
|                                                                                           |  |

## Ihr persönliches Feedback zur Rat Simulator E

### 6. Wie realitätsnah sind folgende Merkmale an der Rat Simulator E im Vergleich zu einer echten Ratte?

| Merkmale                                                                                 | Sehr<br>realistisch<br>1 | Ziemlich<br>realistisch<br>2 | Eher<br>realistisch<br>3 | Eher<br><u>un</u> realistisch<br>4 | Ziemlich<br><u>un</u> realistisch<br>5 | Sehr<br><u>un</u> realistisch<br>6 |
|------------------------------------------------------------------------------------------|--------------------------|------------------------------|--------------------------|------------------------------------|----------------------------------------|------------------------------------|
| Gesamterscheinung                                                                        | <input type="radio"/>    | <input type="radio"/>        | <input type="radio"/>    | <input type="radio"/>              | <input type="radio"/>                  | <input type="radio"/>              |
| Haptik  | <input type="radio"/>    | <input type="radio"/>        | <input type="radio"/>    | <input type="radio"/>              | <input type="radio"/>                  | <input type="radio"/>              |
| Verschieblichkeit der Haut im Nacken                                                     | <input type="radio"/>    | <input type="radio"/>        | <input type="radio"/>    | <input type="radio"/>              | <input type="radio"/>                  | <input type="radio"/>              |
| Verschieblichkeit der Haut an der seitlichen Bauchwand (Flanke)                          | <input type="radio"/>    | <input type="radio"/>        | <input type="radio"/>    | <input type="radio"/>              | <input type="radio"/>                  | <input type="radio"/>              |
| Konsistenz der Hautoberfläche                                                            | <input type="radio"/>    | <input type="radio"/>        | <input type="radio"/>    | <input type="radio"/>              | <input type="radio"/>                  | <input type="radio"/>              |
| Körpergröße                                                                              | <input type="radio"/>    | <input type="radio"/>        | <input type="radio"/>    | <input type="radio"/>              | <input type="radio"/>                  | <input type="radio"/>              |
| Gewicht                                                                                  | <input type="radio"/>    | <input type="radio"/>        | <input type="radio"/>    | <input type="radio"/>              | <input type="radio"/>                  | <input type="radio"/>              |
| Körperform                                                                               | <input type="radio"/>    | <input type="radio"/>        | <input type="radio"/>    | <input type="radio"/>              | <input type="radio"/>                  | <input type="radio"/>              |
| Proportionen                                                                             | <input type="radio"/>    | <input type="radio"/>        | <input type="radio"/>    | <input type="radio"/>              | <input type="radio"/>                  | <input type="radio"/>              |

### 7. Wie realitätsnah war für Sie das Training an der Rat Simulator E im Vergleich zu einer echten Ratte?

| Versuchstierkundliche Methoden                         | Sehr<br>realistisch<br>1 | Ziemlich<br>realistisch<br>2 | Eher<br>realistisch<br>3 | Eher<br><u>un</u> realistisch<br>4 | Ziemlich<br><u>un</u> realistisch<br>5 | Sehr<br><u>un</u> realistisch<br>6 | Methode<br>nicht trainiert. |
|--------------------------------------------------------|--------------------------|------------------------------|--------------------------|------------------------------------|----------------------------------------|------------------------------------|-----------------------------|
| Handling - Transfer von Käfig zu Käfig                 | <input type="radio"/>    | <input type="radio"/>        | <input type="radio"/>    | <input type="radio"/>              | <input type="radio"/>                  | <input type="radio"/>              | <input type="radio"/>       |
| Fixieren mit Nackengriff                               | <input type="radio"/>    | <input type="radio"/>        | <input type="radio"/>    | <input type="radio"/>              | <input type="radio"/>                  | <input type="radio"/>              | <input type="radio"/>       |
| Fixieren mit oberem Schultergriff                      | <input type="radio"/>    | <input type="radio"/>        | <input type="radio"/>    | <input type="radio"/>              | <input type="radio"/>                  | <input type="radio"/>              | <input type="radio"/>       |
| Fixieren mit mittlerem Schultergriff                   | <input type="radio"/>    | <input type="radio"/>        | <input type="radio"/>    | <input type="radio"/>              | <input type="radio"/>                  | <input type="radio"/>              | <input type="radio"/>       |
| Fixieren mit unterem Schultergriff                     | <input type="radio"/>    | <input type="radio"/>        | <input type="radio"/>    | <input type="radio"/>              | <input type="radio"/>                  | <input type="radio"/>              | <input type="radio"/>       |
| Applikation per os mit Sonde                           | <input type="radio"/>    | <input type="radio"/>        | <input type="radio"/>    | <input type="radio"/>              | <input type="radio"/>                  | <input type="radio"/>              | <input type="radio"/>       |
| Applikation subkutan Nackenhautfalte                   | <input type="radio"/>    | <input type="radio"/>        | <input type="radio"/>    | <input type="radio"/>              | <input type="radio"/>                  | <input type="radio"/>              | <input type="radio"/>       |
| Applikation subkutan seitliche Bauchhautfalte (Flanke) | <input type="radio"/>    | <input type="radio"/>        | <input type="radio"/>    | <input type="radio"/>              | <input type="radio"/>                  | <input type="radio"/>              | <input type="radio"/>       |
| Applikation intramuskulär                              | <input type="radio"/>    | <input type="radio"/>        | <input type="radio"/>    | <input type="radio"/>              | <input type="radio"/>                  | <input type="radio"/>              | <input type="radio"/>       |
| Applikation intravenös in die laterale Schwanzvene     | <input type="radio"/>    | <input type="radio"/>        | <input type="radio"/>    | <input type="radio"/>              | <input type="radio"/>                  | <input type="radio"/>              | <input type="radio"/>       |
| Blutentnahme aus der lateralen Schwanzvene             | <input type="radio"/>    | <input type="radio"/>        | <input type="radio"/>    | <input type="radio"/>              | <input type="radio"/>                  | <input type="radio"/>              | <input type="radio"/>       |
| Sonstiges:                                             | <input type="radio"/>    | <input type="radio"/>        | <input type="radio"/>    | <input type="radio"/>              | <input type="radio"/>                  | <input type="radio"/>              | <input type="radio"/>       |
|                                                        | <input type="radio"/>    | <input type="radio"/>        | <input type="radio"/>    | <input type="radio"/>              | <input type="radio"/>                  | <input type="radio"/>              | <input type="radio"/>       |

### 8. Wie gut treffen folgende Aussagen über das Training an der Rat Simulator E zu?

|                                                                                                      | Trifft<br>voll und ganz zu<br>1 | Trifft<br>weitgehend zu<br>2 | Trifft<br>eher zu<br>3 | Trifft<br>eher <u>nicht</u> zu<br>4 | Trifft<br>weitgehend<br><u>nicht</u> zu<br>5 | Trifft ganz und<br>gar <u>nicht</u> zu<br>6 |
|------------------------------------------------------------------------------------------------------|---------------------------------|------------------------------|------------------------|-------------------------------------|----------------------------------------------|---------------------------------------------|
| Ich habe mich beim <b>Handling und Fixieren</b> an der lebenden Ratte sicherer gefühlt.              | <input type="radio"/>           | <input type="radio"/>        | <input type="radio"/>  | <input type="radio"/>               | <input type="radio"/>                        | <input type="radio"/>                       |
| Ich habe mich bei den <b>versuchstierkundlichen Methoden</b> an der lebenden Ratte sicherer gefühlt. | <input type="radio"/>           | <input type="radio"/>        | <input type="radio"/>  | <input type="radio"/>               | <input type="radio"/>                        | <input type="radio"/>                       |

| 9. Wie gut hat Sie die Rat Simulator E auf das <u>gesamte</u> Kurstraining an der lebenden Ratte vorbereitet? |                       |                       |                       |                       |                       |
|---------------------------------------------------------------------------------------------------------------|-----------------------|-----------------------|-----------------------|-----------------------|-----------------------|
| Sehr gut                                                                                                      | Ziemlich gut          | Eher gut              | Eher schlecht         | Ziemlich schlecht     | Sehr schlecht         |
| 1                                                                                                             | 2                     | 3                     | 4                     | 5                     | 6                     |
| <input type="radio"/>                                                                                         | <input type="radio"/> | <input type="radio"/> | <input type="radio"/> | <input type="radio"/> | <input type="radio"/> |

| 10. Wie gut hat Sie die Rat Simulator E auf die folgenden Methoden im Kurstraining an der lebenden Ratte vorbereitet? |                       |                       |                       |                       |                       |                       |                          |
|-----------------------------------------------------------------------------------------------------------------------|-----------------------|-----------------------|-----------------------|-----------------------|-----------------------|-----------------------|--------------------------|
|                                                                                                                       | Sehr gut              | Ziemlich gut          | Eher gut              | Eher schlecht         | Ziemlich schlecht     | Sehr schlecht         | Methode nicht trainiert. |
| Versuchstierkundliche Methoden                                                                                        | 1                     | 2                     | 3                     | 4                     | 5                     | 6                     |                          |
| Handling - Transfer von Käfig zu Käfig                                                                                | <input type="radio"/>    |
| Fixieren mit Nackengriff                                                                                              | <input type="radio"/>    |
| Fixieren mit oberem Schultergriff                                                                                     | <input type="radio"/>    |
| Fixieren mit mittlerem Schultergriff                                                                                  | <input type="radio"/>    |
| Fixieren mit unterem Schultergriff                                                                                    | <input type="radio"/>    |
| Applikation per os mit Sonde                                                                                          | <input type="radio"/>    |
| Applikation subkutan Nackenhautfalte                                                                                  | <input type="radio"/>    |
| Applikation subkutan seitliche Bauchhautfalte (Flanke)                                                                | <input type="radio"/>    |
| Applikation intramuskulär                                                                                             | <input type="radio"/>    |
| Applikation intravenös in die laterale Schwanzvene                                                                    | <input type="radio"/>    |
| Blutentnahme aus der lateralen Schwanzvene                                                                            | <input type="radio"/>    |
| Sonstiges:                                                                                                            | <input type="radio"/>    |
|                                                                                                                       | <input type="radio"/>    |

| 11. Was hat Ihnen an der Rat Simulator E besonders gut gefallen? |
|------------------------------------------------------------------|
| <br><br><br><br><br><br><br><br><br><br>                         |

| 12. Was hat Ihnen an der Rat Simulator E <u>nicht</u> gefallen? |
|-----------------------------------------------------------------|
| <br><br><br><br><br><br><br><br><br><br>                        |

| 13. Was würden Sie an der Rat Simulator E gerne verbessern? |
|-------------------------------------------------------------|
| <br><br><br><br><br><br><br><br><br><br>                    |

14. Mit welchen Tierarten werden Sie nach bestandem Kurs in den nächsten 6 Monaten voraussichtlich versuchstierkundlich arbeiten?  
 Mehrfachantworten sind bei den Tierarten möglich.

|                                      |                                  |                                                     |
|--------------------------------------|----------------------------------|-----------------------------------------------------|
| <input type="checkbox"/> Ratte       | <input type="checkbox"/> Schwein | <input type="checkbox"/> Hund                       |
| <input type="checkbox"/> Maus        | <input type="checkbox"/> Schaf   | <input type="checkbox"/> Katze                      |
| <input type="checkbox"/> Kaninchen   | <input type="checkbox"/> Ziege   | <input type="checkbox"/> Sonstiges _____            |
| <input type="checkbox"/> Meerschwein | <input type="checkbox"/> Rind    | <input type="checkbox"/> Keine                      |
| <input type="checkbox"/> Hamster     | <input type="checkbox"/> Pferd   | <input type="checkbox"/> Kann ich nicht beurteilen. |

15. Wie alt sind Sie?  
 \_\_\_\_\_ Jahre

**16. Welches Geschlecht haben Sie?**

- ☐ Männlich
- ☐ Weiblich
- ☐ Divers
- ☐ Keine Angabe

**17. Bitte kreuzen Sie Ihren höchsten abgeschlossenen Bildungsabschluss an.**

Nur eine Antwort ist möglich

- ☐ (Noch) kein beruflicher Abschluss
- ☐ Abgeschlossene berufliche-/ betriebliche-/ schulische Ausbildung
- ☐ Abgeschlossene Ausbildung an Fachschule, Meister-, Technikerschule, Berufs- oder Fachakademie
- ☐ Fachhochschulabschluss
- ☐ Bachelorabschluss
- ☐ Master-, Magister-, Diplom- oder Staatsexamensabschluss
- ☐ Promotion
- ☐ Sonstiges: \_\_\_\_\_

**18. Bitte vervollständigen Sie den Satz:**

Nur eine Antwort ist möglich.

**Ich besuche den Kurs als ...**

- ☐ ...wissenschaftlich Beschäftigte/r.
- ☐ ...wissenschaftlich-technische/r Mitarbeiter/in.
- ☐ ...Auszubildende/r.
- ☐ ...Studierende/r.
- ☐ ...Sonstiges: \_\_\_\_\_.

**19. Aus welcher Fachrichtung kommen Sie?**

Nur eine Antwort ist möglich.

- ☐ Humanmedizin
- ☐ Veterinärmedizin
- ☐ Zahnmedizin
- ☐ Pharmazie
- ☐ Biologie
- ☐ Chemie
- ☐ Physik
- ☐ Biotechnologie
- ☐ Ernährungswissenschaft
- ☐ Sonstiges: \_\_\_\_\_

**20. Hatten Sie vor dem Kurs bereits Erfahrung ...**

Nur eine Antwort ist möglich.

**...im Handling von Ratten?**

- ☐ Ja, viel.
- ☐ Ja, etwas.
- ☐ Nein, gar keine.

**21. Hatten Sie vor dem Kurs bereits Erfahrung ...**

Nur eine Antwort ist möglich.

**...im Handling von Mäusen?**

- ☐ Ja, viel.
- ☐ Ja, etwas.
- ☐ Nein, gar keine.

**22. Haben Sie vor dem Kurs schon einmal mit Simulatoren gearbeitet?**

Mehrere Antworten für Simulatoren sind möglich. Bitte beschreiben Sie das Modell kurz.

- ☐ Ja, ...
  - ☐ ...mit Ratten-Simulatoren: Modell: \_\_\_\_\_
  - ☐ ...mit Maus-Simulatoren: Modell: \_\_\_\_\_
  - ☐ ...mit sonstigen Simulatoren: Modell: \_\_\_\_\_
- ☐ Nein.

**Haben Sie weitere Anmerkungen, Lob oder Kritik? Wir freuen uns über Ihr Feedback!**

**Herzlichen Dank für Ihre Teilnahme!**

**Das SimulRATor-Team**

**[web: www.simulator.de](http://web: www.simulator.de) mail: [kontakt@simulator.de](mailto:kontakt@simulator.de)**
